# Supplementary material for: An ANOCEF Genomic and Transcriptomic Microarray Study of the Response to Irinotecan and Bevacizumab in Recurrent Glioblastomas
Source: Biomed Res Int. 2014 Apr 2;2014:282815. doi: 10.1155/2014/282815 (PMC3996912; doi:10.1155/2014/282815)
Supplement: Supplementary file 1 — Additional Table 1: Patients' clinical characteristics and classification according to Gravendeel and Verhaak classification. Additional Table 2: Primers used for RT-PCR. Additional Table 3: a) Main Genomic alterations significantly associated with the response to bevacizumab/irinotecan b) Complete list of genomic differences with a P-value < 0.05 in responders and non-responders. Additional Table 4: Complete list of genes differentially expressed with a P-value < 0.05 between responders and non-responders. Additional Table 5: Gene expression fold change in the initial and independent series of the 6 genes studied using RT-PCR. Additional Table 6: List of gene sets with a hypergeometric P-value < 0.05 in non-responders. Additional Table 7: List of gene sets with a hypergeometric P-value < 0.05 in responders. [file 282815.f1.xls]

## Sheet: Supp Table 1
Sample Name	Gene expression study	Genomic study	Age at diagnosis	Sex	Histology	Tumor Location	Tumor Surgery	Initial treatment	Number of adjuvant TMZ cycles	First recurrence treatment	Second recurrence treatment	Third recurrence treatment	Fourth recurrent treatment	Nb of recurrence at beva/irinotecan onset	Delay between diagnosis and beva/irinotecan onset (months)	KPS at bevacizumab / irinotecan onset	Responder (R) or Non responder (NR)	Best response	PFS after bevacizumab / irinotecan	Progression during	OS after bevacizumab / irinotecan	Death	OS since diagnosis	Verhaak classification	EGFR	p16	EGFR + P16	Gravendeel Intrinsic Glioma Subtypes
BEVA_FDY_HS_001	x	x	56.2574	F	Glioblastoma multiforme	parietal-occipital	large	Stupp protocol	2	Surgery and Gliadel	bevacizumab and irinotecan			2	9.92857	80	NR	PR	3.92857	1	8.25	0	19.25	M	0	0		23
BEVA_FDY_HS_002	x	x	65.013	H	Glioblastoma multiforme	temporal	large	Stupp protocol	7	bevacizumab and irinotecan				1	11.7143	70	NR	P	1.92857	1	7.67857	1	19.3929	C	1	1	1	18
BEVA_FDY_HS_003	x	x	71.9644	F	Glioblastoma multiforme	parietal-occipital	large	Stupp protocol	6	bevacizumab and irinotecan				1	16.5	80	R	CR	10.7143	1	17.25	0	33.75	N	1	1	1	18
BEVA_FDY_HS_004	x	x	62.3107	H	Glioblastoma multiforme	frontal	large	Stupp protocol	10	Surgery and Gliadel	bevacizumab and irinotecan			2	17.2857	60	NR	PR	2.21429	1	3.28571	1	20.5714	C	1	1	1	18
BEVA_FDY_HS_005	x	x	48.8652	F	Glioblastoma multiforme	frontal	large	Stupp protocol	2	bevacizumab and irinotecan				1	6.82143	80	NR	P	1.89286	1	7.78571	0	14.6071	C	1	1	1	18
BEVA_FDY_HS_006	x	x	58.6092	H	Glioblastoma multiforme	temporal	large	Stupp protocol	6	bevacizumab and irinotecan				1	22.3571	70	NR	P	4	1	6.14286	1	28.5	C	1	0		18
BEVA_FDY_HS_007	x	x	57.974	F	Glioblastoma multiforme	frontal	large	Stupp protocol	6	Surgery and Gliadel	bevacizumab and irinotecan			2	25.0714	80	R	PR	6	1	15.6786	0	40.75	C	1	1	1	18
BEVA_FDY_HS_008	x	x	57.1225	H	Glioblastoma multiforme	frontal	large	Stupp protocol	6	Surgery and Gliadel	bevacizumab and irinotecan			2	16	70	R	PR	7.89286	1	8.78571	1	24.7857	M	0	0		23
BEVA_FDY_HS_009	x	x	61.3881	F	Glioblastoma multiforme	occipital	large	Stupp protocol	4	BCNU	bevacizumab and irinotecan			2	13.5357	60	R	PR	9.39286	1	9.60714	1	23.1429	P	0	0		22
BEVA_FDY_HS_010	x		59.4497	F	Glioblastoma multiforme	frontal	biopsy	Stupp protocol	2	bevacizumab and irinotecan				1	6.53571	60	R	PR	12	0	18.9286	1	25.4643	P				22
BEVA_FDY_HS_011	x	x	37.2512	H	Glioblastoma multiforme	temporal	large	Stupp protocol	3	Fotemustine	bevacizumab and irinotecan			2	11.3214	70	NR	PR	4.03571	1	7	1	18.3214	P	0	0		18
BEVA_FDY_HS_012	x		62.6229	H	Glioblastoma multiforme	frontal	biopsy	Stupp protocol	3	bevacizumab and irinotecan				1	6	60	R	CR	18	0	25.9643	0	32.1071	M				23
BEVA_FDY_HS_013	x	x	60.7091	H	Glioblastoma multiforme	temporal	large	Stupp protocol	6	bevacizumab and irinotecan				1	10	80	NR	S	4	1	5.5	1	15.9643	M	0	0		23
BEVA_FDY_HS_014	x	x	42.36	H	Glioblastoma multiforme	occipital	large	Stupp protocol	6	bevacizumab and irinotecan	Fotemustine			1	11.25	70	NR	P	2.03571	1	6.35714	1	17.6071	C	1	1	1	18
BEVA_FDY_HS_015	x	x	54.6749	F	Glioblastoma multiforme	temporal	large	Stupp protocol	6	bevacizumab and irinotecan				1	10.5714	60	NR	P	2.42857	1	4.10714	1	14.6786	P	0	0		18
BEVA_FDY_HS_016		x	60.2793	F	Glioblastoma multiforme	occipital	large	Stupp protocol	6	bevacizumab and irinotecan				1	11.25	70	NR	P	1	1	1.39286	1	12.6429		1	1	1
BEVA_FDY_HS_017	x	x	69.1389	F	Glioblastoma multiforme	parietal	large	Stupp protocol	6	bevacizumab and irinotecan				1	13.3214	70	NR	PR	4.07143	1	12.8214	1	25.2857	N	1	1	1	18
BEVA_FDY_HS_019		x	65.6783	H	Glioblastoma multiforme	multifocal	biopsy	Stupp protocol	0	bevacizumab and irinotecan				1	5.35714	NA	R	PR	6.07143	1	8.57143	1	13.9286		1	0
BEVA_FDY_HS_020	x	x	46.0479	H	Glioblastoma multiforme	temporal	large	Stupp protocol	5	BCNU	bevacizumab and irinotecan			2	15.6071	NA	NR	P	0.892857	1	1.35714	1	18	C	1	1	1	18
BEVA_FDY_HS_021	x	x	57.9055	H	Glioblastoma multiforme	parietal-occipital	large	Stupp protocol	6	BCNU	bevacizumab and irinotecan			2	12.9286	80	R	CR	9.82143	1	11.8214	1	24.75	C	1	1	1	18
BEVA_FDY_HS_022	x		65.0979	H	Glioblastoma multiforme	temporal	large	Stupp protocol	1	bevacizumab and irinotecan				1	6.5	NA	R	PR	9	0	15.2143	0	21.7143	P				22
BEVA_FDY_HS_024	x		58.5955	H	Glioblastoma multiforme	frontal	large	Stupp protocol	2	Surgery and Gliadel	bevacizumab and irinotecan			2	26.9643	80	R	PR	8.32143	1	16.4643	0	43.4286	M				23
BEVA_FDY_HS_025	x	x	67.7262	H	Glioblastoma multiforme	temporal	large	Stupp protocol	12	bevacizumab and irinotecan				1	22.1786	90	R	PR	10.6071	1	14.25	1	36.4286	M	0	1		23
BEVA_FDY_HS_026	x	x	47.6112	F	Glioblastoma multiforme	parietal-occipital	large	Stupp protocol	0	Surgery and Gliadel	BCNU	bevacizumab and irinotecan		3	10.9643	NA	NR	P	2.39286	1	6.64286	1	17.6071	C	1	1	1	18
BEVA_FDY_HS_027	x	x	69.3908	H	Glioblastoma multiforme	temporal	large	Stupp protocol	2	bevacizumab and irinotecan				1	12.6786	NA	R	PR	6	1	5.92857	0	13.4286	N	0	0		18

## Sheet: Supp Table 2
Gene		Sequence
NPTX2	Forward primer	gcgtgctgatccttggac
	Reverse primer	cctgagtggcatcaaacctac
	Probe number	15
PRKCZ	Forward primer	ccttcctggtcggattacac
	Reverse primer	cgttgacgtactcaatgacca
	Probe number	38
EPHA7	Forward primer	gaggatgatccagaagctgtctat
	Reverse primer	ggtgctgtccaccttactgg
	Probe number	31
SOCS2	Forward primer	ggagctcggtcagacagg
	Reverse primer	gttccttctggtgcctctttt
	Probe number	60
PDGFD	Forward primer	gctagtgtttgacaatcagtttgg
	Reverse primer	ttcaacttccacaaaatcataccta
	Probe number	38
ENPP4	Forward primer	gcaacttcccacgagtgc
	Reverse primer	cgttgaaggacagcaatcag
	Probe number	28
PPIA	Forward primer	cctaaagcatacgggtcctg
	Reverse primer	tttcactttgccaaacacca
	Probe number	48

## Sheet: Supp Table 3a
Table 2: Genomic alterations significantly associated with the response to bevacizumab/irinotecan
Comparison of the genomic profiles of responders (n=8) and non-responders (n=13) demonstrated 6 focal genomic alterations and 1 whole chromosomal alteration that were significantly different between the two groups (Fisher’s exact test p-value <0.05). Differentially expressed genes with a p-value <0.05 and a fold change (FC) above 1.5 that were located in the alteration are shown with their corres…
Chr= chromosome, NR= Non-responder, R= Responder, % = Frequency of the event, FC= Fold change in NR versus R
Event	Chr	% in NR	% in R	p-value	Differentially expressed genes located in the alteration
Gain	1p32	0	50	0.03	None
Gain	1p31.3	0	50	0.03	None
Gain	1q42	0	50	0.03	PGDB5 (FC=0.6)
Loss	1q43	0	67	0.03	None
Loss	9p21.1	9		0.03	None
Gain	19p13	54	0	0.04	None
Gain	chr20	54	0	0.04	GNAS (FC=4), DOK5 (FC=1.6), PABPC1L (FC=1.7), TGIF2 (FC=1.5)

## Sheet: Supp Table 3b
	id	chrom	loc	gene_symbol	location	pvG	pvL
rs592298	rs592298	1	64288060	ROR1	intron	0,03	1,00
rs639222	rs639222	1	64290298	ROR1	intron	0,03	1,00
rs641335	rs641335	1	64300985	ROR1	intron	0,03	1,00
rs11581982	rs11581982	1	64304937	ROR1	intron	0,03	1,00
rs4915931	rs4915931	1	64309093	ROR1	intron	0,03	1,00
rs602934	rs602934	1	64309265	ROR1	intron	0,03	1,00
rs583102	rs583102	1	64309302	ROR1	intron	0,03	1,00
rs663458	rs663458	1	64312919	ROR1	intron	0,03	1,00
rs649608	rs649608	1	64313696	ROR1	intron	0,03	1,00
rs11208307	rs11208307	1	64336067	ROR1	intron	0,03	1,00
rs11208308	rs11208308	1	64340452	ROR1	intron	0,03	1,00
rs855852	rs855852	1	64351149	ROR1	intron	0,03	1,00
rs855843	rs855843	1	64354825	ROR1	intron	0,03	1,00
rs705529	rs705529	1	64381917	ROR1	intron	0,03	1,00
rs1337406	rs1337406	1	68573853	GPR177	intron	0,03	1,00
rs2033348	rs2033348	1	68574929	GPR177	intron	0,03	1,00
rs2566760	rs2566760	1	68581702	GPR177	intron	0,03	1,00
rs2566762	rs2566762	1	68582457	GPR177	intron	0,03	1,00
rs1367452	rs1367452	1	68586013	GPR177	intron	0,03	1,00
rs7062	rs7062	1	68591253	GPR177	3UTR	0,03	1,00
rs2820483	rs2820483	1	68594640	GPR177	intron	0,03	1,00
rs983034	rs983034	1	68603586	GPR177	coding	0,03	1,00
rs7529360	rs7529360	1	68609967	GPR177	intron	0,03	1,00
rs3762371	rs3762371	1	68620762	GPR177	intron	0,03	1,00
rs12068243	rs12068243	1	68621794	GPR177	intron	0,03	1,00
rs3748705	rs3748705	1	68624878	GPR177	coding	0,03	1,00
rs2772279	rs2772279	1	68626287	LOC645291	3UTR	0,03	1,00
cnvi0006864	cnvi0006864	1	68627028	GPR177	flanking_5UTR	0,03	1,00
rs2820489	rs2820489	1	68628540	LOC645291	3UTR	0,03	1,00
rs930145	rs930145	1	68629530	LOC645291	flanking_5UTR	0,03	1,00
rs2566758	rs2566758	1	68632483	LOC645291	flanking_5UTR	0,03	1,00
rs2566757	rs2566757	1	68634144	LOC645291	flanking_5UTR	0,03	1,00
rs2772304	rs2772304	1	68636580	LOC645291	flanking_5UTR	0,03	1,00
rs4233320	rs4233320	1	68638451	LOC645291	flanking_5UTR	0,03	1,00
rs1367444	rs1367444	1	68638980	LOC645291	flanking_5UTR	0,03	1,00
rs891528	rs891528	1	68640353	LOC645291	flanking_5UTR	0,03	1,00
rs17130546	rs17130546	1	68643147	LOC645291	flanking_5UTR	0,03	1,00
rs2419659	rs2419659	1	68645908	GPR177	flanking_3UTR	0,03	1,00
rs2772300	rs2772300	1	68648026	GPR177	flanking_3UTR	0,03	1,00
rs1430741	rs1430741	1	68654276	GPR177	flanking_3UTR	0,03	1,00
rs2820500	rs2820500	1	68658961	GPR177	flanking_3UTR	0,03	1,00
rs1346864	rs1346864	1	68660546	GPR177	intron	0,03	1,00
rs7529246	rs7529246	1	68667683	GPR177	intron	0,03	1,00
rs989842	rs989842	1	68680929	GPR177	intron	0,03	1,00
rs2772286	rs2772286	1	68685389	GPR177	intron	0,03	1,00
rs10493438	rs10493438	1	68687697	GPR177	intron	0,03	1,00
rs10493439	rs10493439	1	68688069	GPR177	intron	0,03	1,00
rs2915124	rs2915124	1	68688538	GPR177	intron	0,03	1,00
rs1430753	rs1430753	1	68692642	GPR177	intron	0,03	1,00
rs2772294	rs2772294	1	68703843	LOC149224	flanking_3UTR	0,03	1,00
rs1360180	rs1360180	1	68712358	LOC149224	flanking_5UTR	0,03	1,00
rs1360181	rs1360181	1	68714135	LOC149224	flanking_5UTR	0,03	1,00
rs6686875	rs6686875	1	68719016	LOC149224	flanking_5UTR	0,03	1,00
rs7554674	rs7554674	1	68728518	LOC149224	flanking_5UTR	0,03	1,00
rs12065581	rs12065581	1	68732819	LOC149224	flanking_5UTR	0,03	1,00
rs885097	rs885097	1	68733391	LOC149224	flanking_5UTR	0,03	1,00
rs2039153	rs2039153	1	68735899	LOC149224	flanking_5UTR	0,03	1,00
rs944081	rs944081	1	68739525	LOC149224	flanking_5UTR	0,03	1,00
rs7536982	rs7536982	1	68748015	LOC149224	flanking_5UTR	0,03	1,00
rs7546334	rs7546334	1	68750782	LOC149224	flanking_5UTR	0,03	1,00
rs3923451	rs3923451	1	68757334	LOC149224	flanking_5UTR	0,03	1,00
rs7541094	rs7541094	1	68764274	LOC149224	flanking_5UTR	0,03	1,00
rs4259701	rs4259701	1	68779124	LOC149224	flanking_5UTR	0,03	1,00
rs4926354	rs4926354	1	68803646	RPE65	flanking_3UTR	0,03	1,00
rs12087152	rs12087152	1	230456667	PGBD5	flanking_3UTR	0,03	1,00
rs2306813	rs2306813	1	230461079	PGBD5	coding	0,03	1,00
rs2275690	rs2275690	1	237949456	RYR2	intron	1,00	0,03
rs790900	rs790900	1	237957309	RYR2	intron	1,00	0,03
rs1796909	rs1796909	1	237959772	RYR2	intron	1,00	0,03
rs2794828	rs2794828	1	237967937	RYR2	intron	1,00	0,03
rs790883	rs790883	1	237973034	RYR2	intron	1,00	0,03
rs7550039	rs7550039	1	237975768	RYR2	intron	1,00	0,03
rs1891246	rs1891246	1	237981846	RYR2	intron	1,00	0,03
rs2819742	rs2819742	1	237990122	RYR2	intron	1,00	0,03
rs6429040	rs6429040	1	237994300	RYR2	intron	1,00	0,03
rs1416798	rs1416798	1	238010960	RYR2	flanking_3UTR	1,00	0,03
rs659527	rs659527	9	32527324	LOC392301	flanking_3UTR	1,00	0,03
rs597131	rs597131	9	32537141	LOC392301	flanking_3UTR	1,00	0,03
rs10971020	rs10971020	9	32546117	LOC392301	flanking_3UTR	1,00	0,03
rs628425	rs628425	9	32549602	LOC392301	flanking_3UTR	1,00	0,03
rs13295477	rs13295477	9	32561304	LOC392301	flanking_3UTR	1,00	0,03
rs629566	rs629566	9	32573602	LOC392301	flanking_3UTR	1,00	0,03
rs653790	rs653790	9	32576997	LOC392301	flanking_3UTR	1,00	0,03
rs920029	rs920029	9	32583507	LOC392301	flanking_3UTR	1,00	0,03
rs12003093	rs12003093	9	32588258	LOC392301	3UTR	1,00	0,03
rs10971038	rs10971038	9	32592503	LOC392301	3UTR	1,00	0,03
rs688958	rs688958	9	32592639	LOC392301	3UTR	1,00	0,03
rs504896	rs504896	9	32596503	LOC392301	intron	1,00	0,03
rs540467	rs540467	9	32601501	LOC392301	flanking_5UTR	1,00	0,03
rs10971043	rs10971043	9	32604219	LOC392301	flanking_5UTR	1,00	0,03
rs10813840	rs10813840	9	32618055	LOC392301	flanking_5UTR	1,00	0,03
rs10813841	rs10813841	9	32619211	LOC392301	flanking_5UTR	1,00	0,03
rs10813843	rs10813843	9	32625622	ACO1	flanking_5UTR	1,00	0,03
rs2117523	rs2117523	9	32675417	ACO1	flanking_5UTR	1,00	0,03
rs4879592	rs4879592	9	32697114	ACO1	intron	1,00	0,03
rs7030127	rs7030127	9	32707073	ACO1	intron	1,00	0,03
rs4878501	rs4878501	9	32709876	ACO1	intron	1,00	0,03
rs960083	rs960083	9	32739599	ACO1	coding	1,00	0,03
rs1410831	rs1410831	9	32741428	ACO1	intron	1,00	0,03
rs1410832	rs1410832	9	32741593	ACO1	intron	1,00	0,03
rs10813871	rs10813871	9	32746889	ACO1	intron	1,00	0,03
rs12551778	rs12551778	9	32748365	ACO1	flanking_3UTR	1,00	0,03
rs7849269	rs7849269	9	32754685	DDX58	3UTR	1,00	0,03
rs7865760	rs7865760	9	32758898	DDX58	intron	1,00	0,03
rs664241	rs664241	9	32769523	DDX58	intron	1,00	0,03
rs1810807	rs1810807	9	32784838	DDX58	intron	1,00	0,03
rs300639	rs300639	9	32786553	DDX58	intron	1,00	0,03
rs300637	rs300637	9	32786653	DDX58	intron	1,00	0,03
rs300622	rs300622	9	32793466	DDX58	intron	1,00	0,03
rs300629	rs300629	9	32797839	DDX58	intron	1,00	0,03
rs608538	rs608538	9	32811227	DDX58	intron	1,00	0,03
rs606902	rs606902	9	32821457	DDX58	intron	1,00	0,03
rs1822234	rs1822234	9	32827302	DDX58	intron	1,00	0,03
rs12552521	rs12552521	9	32831188	DDX58	flanking_5UTR	1,00	0,03
rs596443	rs596443	9	32834922	TOPORS	flanking_3UTR	1,00	0,03
rs12684472	rs12684472	9	32850712	TOPORS	intron	1,00	0,03
rs1442286	rs1442286	9	32855756	TOPORS	intron	1,00	0,03
rs10813878	rs10813878	9	32859234	NDUFB6	intron	1,00	0,03
rs10971169	rs10971169	9	32866253	NDUFB6	flanking_5UTR	1,00	0,03
rs10813887	rs10813887	9	32879341	NDUFB6	flanking_5UTR	1,00	0,03
rs4878509	rs4878509	9	32884254	NDUFB6	flanking_5UTR	1,00	0,03
rs1888871	rs1888871	9	32886639	NDUFB6	flanking_5UTR	1,00	0,03
rs1348255	rs1348255	9	32886717	NDUFB6	flanking_5UTR	1,00	0,03
rs10511913	rs10511913	9	32889200	NDUFB6	flanking_5UTR	1,00	0,03
rs724259	rs724259	9	32890160	NDUFB6	flanking_5UTR	1,00	0,03
rs724258	rs724258	9	32890348	TAF1L	flanking_3UTR	1,00	0,03
cnvi0002266	cnvi0002266	9	32900849	TAF1L	flanking_3UTR	1,00	0,03
rs1470217	rs1470217	9	32903868	TAF1L	flanking_3UTR	1,00	0,03
rs7042500	rs7042500	9	32907608	TAF1L	flanking_3UTR	1,00	0,03
rs12552198	rs12552198	9	32925505	TAF1L	flanking_3UTR	1,00	0,03
rs4878520	rs4878520	9	32930288	TAF1L	flanking_5UTR	1,00	0,03
cnvi0009218	cnvi0009218	19	20208964	GMIP	intron	0,04	1,00
cnvi0017844	cnvi0017844	19	20209518	ATP13A1	intron	0,04	1,00
rs6074947	rs6074947	20	216811	ZNF132	intron	0,04	1,00
rs10485818	rs10485818	20	220303	ZNF324B	3UTR	0,04	1,00
rs10485819	rs10485819	20	221018	ZNF446	coding	0,04	1,00
rs12624551	rs12624551	20	222632	ZNF446	coding	0,04	1,00
rs1978761	rs1978761	20	222836	SLC27A5	intron	0,04	1,00
rs16999397	rs16999397	20	224128	ZBTB45	coding	0,04	1,00
rs4815112	rs4815112	20	283877	MZF1	coding	0,04	1,00
rs6048226	rs6048226	20	285323	MZF1	intron	0,04	1,00
rs6082956	rs6082956	20	288996	MGC2752	flanking_3UTR	0,04	1,00
rs723477	rs723477	20	289362	MZF1	flanking_5UTR	0,04	1,00
rs6049002	rs6049002	20	296172	MZF1	flanking_5UTR	0,04	1,00
rs6049789	rs6049789	20	304800	DEFB125	flanking_5UTR	0,04	1,00
cnvi0010427	cnvi0010427	20	306826	DEFB125	intron	0,04	1,00
rs6050276	rs6050276	20	309692	DEFB125	intron	0,04	1,00
rs6051321	rs6051321	20	322612	DEFB125	intron	0,04	1,00
rs1001549	rs1001549	20	335225	DEFB125	coding	0,04	1,00
rs6051490	rs6051490	20	345864	DEFB125	flanking_3UTR	0,04	1,00
rs6051492	rs6051492	20	346751	DEFB125	flanking_3UTR	0,04	1,00
rs6051520	rs6051520	20	351944	DEFB125	flanking_3UTR	0,04	1,00
rs742605	rs742605	20	353085	DEFB125	flanking_3UTR	0,04	1,00
rs6084242	rs6084242	20	357050	DEFB126	flanking_5UTR	0,04	1,00
rs6037475	rs6037475	20	358935	DEFB126	flanking_5UTR	0,04	1,00
rs6139007	rs6139007	20	360789	DEFB126	flanking_5UTR	0,04	1,00
rs6115830	rs6115830	20	377226	DEFB126	intron	0,04	1,00
rs2145068	rs2145068	20	380980	DEFB126	flanking_3UTR	0,04	1,00
rs6037542	rs6037542	20	382876	DEFB126	flanking_3UTR	0,04	1,00
rs4815579	rs4815579	20	383720	DEFB127	flanking_5UTR	0,04	1,00
rs6084337	rs6084337	20	384898	DEFB127	coding	0,04	1,00
rs4815585	rs4815585	20	389881	DEFB127	flanking_3UTR	0,04	1,00
rs7059	rs7059	20	391170	DEFB127	flanking_3UTR	0,04	1,00
rs6115906	rs6115906	20	397928	DEFB128	flanking_3UTR	0,04	1,00
rs11698154	rs11698154	20	398278	DEFB128	intron	0,04	1,00
rs3787563	rs3787563	20	404916	DEFB128	flanking_5UTR	0,04	1,00
rs2295495	rs2295495	20	411842	DEFB128	flanking_5UTR	0,04	1,00
rs2273463	rs2273463	20	425434	DEFB128	flanking_5UTR	0,04	1,00
rs6052047	rs6052047	20	425865	DEFB128	flanking_5UTR	0,04	1,00
rs282159	rs282159	20	598694	TRIB3	flanking_5UTR	0,04	1,00
rs282160	rs282160	20	600964	TRIB3	flanking_5UTR	0,04	1,00
rs6133220	rs6133220	20	603620	TRIB3	flanking_5UTR	0,04	1,00
rs6038199	rs6038199	20	606714	TRIB3	flanking_5UTR	0,04	1,00
rs911448	rs911448	20	610661	TRIB3	flanking_5UTR	0,04	1,00
rs6139794	rs6139794	20	617808	TRIB3	coding	0,04	1,00
rs1980586	rs1980586	20	619611	TRIB3	flanking_3UTR	0,04	1,00
rs6053635	rs6053635	20	625267	TRIB3	flanking_3UTR	0,04	1,00
rs6053666	rs6053666	20	628890	RBCK1	flanking_5UTR	0,04	1,00
rs6107696	rs6107696	20	630970	RBCK1	flanking_5UTR	0,04	1,00
rs6085283	rs6085283	20	632959	RBCK1	intron	0,04	1,00
rs12480949	rs12480949	20	638921	RBCK1	intron	0,04	1,00
rs6053783	rs6053783	20	641893	RBCK1	intron	0,04	1,00
rs6107716	rs6107716	20	643919	RBCK1	intron	0,04	1,00
rs6053798	rs6053798	20	645853	RBCK1	intron	0,04	1,00
rs6053809	rs6053809	20	648989	RBCK1	flanking_3UTR	0,04	1,00
rs753490	rs753490	20	652097	TBC1D20	intron	0,04	1,00
rs6076914	rs6076914	20	655242	TBC1D20	intron	0,04	1,00
rs6085394	rs6085394	20	660793	TBC1D20	intron	0,04	1,00
rs4815889	rs4815889	20	665551	TBC1D20	intron	0,04	1,00
rs6139948	rs6139948	20	674962	TBC1D20	intron	0,04	1,00
rs1535234	rs1535234	20	675903	TBC1D20	intron	0,04	1,00
rs6085469	rs6085469	20	681164	TBC1D20	flanking_5UTR	0,04	1,00
rs753320	rs753320	20	683616	TBC1D20	flanking_5UTR	0,04	1,00
rs6038447	rs6038447	20	687401	CSNK2A1	flanking_3UTR	0,04	1,00
rs6139971	rs6139971	20	687772	CSNK2A1	intron	0,04	1,00
rs6054162	rs6054162	20	688741	CSNK2A1	intron	0,04	1,00
rs6054168	rs6054168	20	688988	CSNK2A1	intron	0,04	1,00
cnvi0010429	cnvi0010429	20	689448	CSNK2A1	intron	0,04	1,00
rs6117232	rs6117232	20	689537	CSNK2A1	intron	0,04	1,00
rs873544	rs873544	20	691592	CSNK2A1	intron	0,04	1,00
rs1114734	rs1114734	20	694894	CSNK2A1	intron	0,04	1,00
rs8121910	rs8121910	20	695670	CSNK2A1	intron	0,04	1,00
rs6117279	rs6117279	20	698987	CSNK2A1	flanking_5UTR	0,04	1,00
rs6085580	rs6085580	20	702570	CSNK2A1	flanking_5UTR	0,04	1,00
rs6107832	rs6107832	20	707880	CSNK2A1	flanking_5UTR	0,04	1,00
rs927067	rs927067	20	714462	CSNK2A1	flanking_5UTR	0,04	1,00
rs6117373	rs6117373	20	717649	CSNK2A1	flanking_5UTR	0,04	1,00
rs1884639	rs1884639	20	719854	CSNK2A1	flanking_5UTR	0,04	1,00
rs1074257	rs1074257	20	723155	TCF15	flanking_3UTR	0,04	1,00
rs6140090	rs6140090	20	731744	TCF15	flanking_3UTR	0,04	1,00
rs6085691	rs6085691	20	735858	TCF15	flanking_3UTR	0,04	1,00
rs4815945	rs4815945	20	739452	TCF15	flanking_3UTR	0,04	1,00
rs6117508	rs6117508	20	742931	TCF15	flanking_3UTR	0,04	1,00
rs2317024	rs2317024	20	743220	TCF15	flanking_3UTR	0,04	1,00
rs6140113	rs6140113	20	743770	TCF15	flanking_3UTR	0,04	1,00
rs910858	rs910858	20	743827	TCF15	flanking_3UTR	0,04	1,00
rs3746802	rs3746802	20	744308	TCF15	intron	0,04	1,00
rs3746803	rs3746803	20	744382	TCF15	intron	0,04	1,00
rs3746804	rs3746804	20	744415	TCF15	flanking_5UTR	0,04	1,00
rs3746807	rs3746807	20	745963	TCF15	flanking_5UTR	0,04	1,00
rs1884637	rs1884637	20	748974	TCF15	flanking_5UTR	0,04	1,00
rs4815961	rs4815961	20	752633	TCF15	flanking_5UTR	0,04	1,00
rs668988	rs668988	20	753739	TCF15	flanking_5UTR	0,04	1,00
rs530831	rs530831	20	775376	TCF15	flanking_5UTR	0,04	1,00
rs535315	rs535315	20	775842	SRXN1	flanking_3UTR	0,04	1,00
rs628692	rs628692	20	778405	SRXN1	flanking_3UTR	0,04	1,00
rs495241	rs495241	20	780387	SRXN1	flanking_3UTR	0,04	1,00
rs592954	rs592954	20	781645	SRXN1	flanking_3UTR	0,04	1,00
rs2180465	rs2180465	20	787341	SRXN1	3UTR	0,04	1,00
rs645843	rs645843	20	798755	SRXN1	intron	0,04	1,00
rs600810	rs600810	20	802123	SRXN1	intron	0,04	1,00
rs673261	rs673261	20	806878	SCRT2	flanking_3UTR	0,04	1,00
rs6055109	rs6055109	20	807864	SCRT2	flanking_3UTR	0,04	1,00
rs610274	rs610274	20	809930	SCRT2	3UTR	0,04	1,00
rs491100	rs491100	20	811975	SCRT2	intron	0,04	1,00
rs552367	rs552367	20	823504	SCRT2	intron	0,04	1,00
rs1045410	rs1045410	20	826666	SCRT2	intron	0,04	1,00
rs4816023	rs4816023	20	832763	SCRT2	intron	0,04	1,00
rs626703	rs626703	20	836700	SCRT2	flanking_5UTR	0,04	1,00
rs2183307	rs2183307	20	838260	SCRT2	flanking_5UTR	0,04	1,00
rs6038974	rs6038974	20	840405	SCRT2	flanking_5UTR	0,04	1,00
rs6086286	rs6086286	20	844801	SCRT2	flanking_5UTR	0,04	1,00
rs1411192	rs1411192	20	851769	SCRT2	flanking_5UTR	0,04	1,00
rs1888087	rs1888087	20	853435	LOC727883	flanking_3UTR	0,04	1,00
rs944115	rs944115	20	856837	LOC727883	flanking_3UTR	0,04	1,00
rs882805	rs882805	20	857377	LOC727883	flanking_3UTR	0,04	1,00
rs6077309	rs6077309	20	862823	LOC727883	flanking_3UTR	0,04	1,00
rs6055551	rs6055551	20	863706	LOC727883	flanking_3UTR	0,04	1,00
rs3787565	rs3787565	20	864512	SCRT2	flanking_5UTR	0,04	1,00
rs6086361	rs6086361	20	870556	LOC727883	flanking_3UTR	0,04	1,00
rs6108123	rs6108123	20	873277	LOC727883	flanking_3UTR	0,04	1,00
rs4816051	rs4816051	20	873749	LOC727883	flanking_3UTR	0,04	1,00
rs1590871	rs1590871	20	876702	LOC727883	flanking_3UTR	0,04	1,00
rs6039132	rs6039132	20	882803	LOC727883	flanking_3UTR	0,04	1,00
rs6039134	rs6039134	20	883000	LOC727883	flanking_3UTR	0,04	1,00
rs6055734	rs6055734	20	883514	LOC727883	flanking_3UTR	0,04	1,00
rs976165	rs976165	20	886856	LOC727883	flanking_5UTR	0,04	1,00
rs742922	rs742922	20	887675	LOC727883	flanking_5UTR	0,04	1,00
rs574628	rs574628	20	892948	LOC727883	flanking_5UTR	0,04	1,00
rs524765	rs524765	20	894967	LOC727883	flanking_5UTR	0,04	1,00
rs1014898	rs1014898	20	895531	C20orf54	flanking_3UTR	0,04	1,00
rs1997923	rs1997923	20	897614	C20orf54	flanking_3UTR	0,04	1,00
rs501322	rs501322	20	900831	C20orf54	flanking_3UTR	0,04	1,00
rs530365	rs530365	20	901676	C20orf54	intron	0,04	1,00
rs6133587	rs6133587	20	902060	C20orf54	intron	0,04	1,00
rs761570	rs761570	20	912626	C20orf54	intron	0,04	1,00
rs6086545	rs6086545	20	915863	C20orf54	intron	0,04	1,00
rs564744	rs564744	20	921971	C20orf54	coding	0,04	1,00
rs500655	rs500655	20	929504	C20orf54	coding	0,04	1,00
rs530652	rs530652	20	930560	C20orf54	5UTR	0,04	1,00
rs480789	rs480789	20	932618	C20orf54	flanking_5UTR	0,04	1,00
rs6140734	rs6140734	20	934313	C20orf54	flanking_5UTR	0,04	1,00
rs550408	rs550408	20	934948	C20orf54	flanking_5UTR	0,04	1,00
rs6039300	rs6039300	20	936079	C20orf54	flanking_5UTR	0,04	1,00
rs486344	rs486344	20	939161	C20orf54	flanking_5UTR	0,04	1,00
rs564477	rs564477	20	941419	C20orf54	flanking_5UTR	0,04	1,00
rs570869	rs570869	20	942098	C20orf54	flanking_5UTR	0,04	1,00
rs6086687	rs6086687	20	943058	FAM110A	flanking_5UTR	0,04	1,00
rs2317321	rs2317321	20	953050	FAM110A	flanking_5UTR	0,04	1,00
rs6086733	rs6086733	20	954364	FAM110A	flanking_5UTR	0,04	1,00
rs6140836	rs6140836	20	955412	FAM110A	flanking_5UTR	0,04	1,00
rs4816116	rs4816116	20	959339	FAM110A	flanking_5UTR	0,04	1,00
rs6086773	rs6086773	20	961220	FAM110A	flanking_5UTR	0,04	1,00
rs6108256	rs6108256	20	961527	FAM110A	flanking_5UTR	0,04	1,00
rs4813886	rs4813886	20	964652	FAM110A	intron	0,04	1,00
rs6140878	rs6140878	20	967848	FAM110A	3UTR	0,04	1,00
rs6133676	rs6133676	20	972129	FAM110A	flanking_3UTR	0,04	1,00
rs1569816	rs1569816	20	973669	FAM110A	flanking_3UTR	0,04	1,00
rs6056558	rs6056558	20	985530	FAM110A	flanking_3UTR	0,04	1,00
rs6039459	rs6039459	20	992713	ANGPT4	flanking_3UTR	0,04	1,00
rs6056637	rs6056637	20	999784	ANGPT4	flanking_3UTR	0,04	1,00
rs879013	rs879013	20	1009679	ANGPT4	flanking_3UTR	0,04	1,00
rs6039511	rs6039511	20	1010089	ANGPT4	3UTR	0,04	1,00
rs4816153	rs4816153	20	1012798	ANGPT4	intron	0,04	1,00
rs6056801	rs6056801	20	1020318	ANGPT4	intron	0,04	1,00
rs6056813	rs6056813	20	1022712	ANGPT4	intron	0,04	1,00
rs4816177	rs4816177	20	1029686	ANGPT4	intron	0,04	1,00
rs6118727	rs6118727	20	1030235	ANGPT4	intron	0,04	1,00
rs2180368	rs2180368	20	1039828	ANGPT4	intron	0,04	1,00
rs6056973	rs6056973	20	1040861	ANGPT4	intron	0,04	1,00
rs6087073	rs6087073	20	1045261	ANGPT4	intron	0,04	1,00
rs6087091	rs6087091	20	1050896	ANGPT4	intron	0,04	1,00
rs6077755	rs6077755	20	1089961	ANGPT4	intron	0,04	1,00
cnvi0010430	cnvi0010430	20	1095154	ANGPT4	intron	0,04	1,00
rs6074136	rs6074136	20	1095396	ANGPT4	intron	0,04	1,00
cnvi0010431	cnvi0010431	20	1095562	ANGPT4	intron	0,04	1,00
rs6077792	rs6077792	20	1096116	ANGPT4	intron	0,04	1,00
rs4813031	rs4813031	20	1097747	ANGPT4	intron	0,04	1,00
rs6074148	rs6074148	20	1098486	ANGPT4	intron	0,04	1,00
rs1803415	rs1803415	20	1099523	ANGPT4	intron	0,04	1,00
rs3787573	rs3787573	20	1100669	ANGPT4	flanking_5UTR	0,04	1,00
rs2268065	rs2268065	20	1102532	ANGPT4	flanking_5UTR	0,04	1,00
rs6032895	rs6032895	20	1104297	ANGPT4	flanking_5UTR	0,04	1,00
rs1883522	rs1883522	20	1126724	ANGPT4	flanking_5UTR	0,04	1,00
rs4813941	rs4813941	20	1128013	ANGPT4	flanking_5UTR	0,04	1,00
rs6077915	rs6077915	20	1130033	ANGPT4	flanking_5UTR	0,04	1,00
rs6040222	rs6040222	20	1140727	RSPO4	flanking_3UTR	0,04	1,00
rs4813044	rs4813044	20	1148783	RSPO4	flanking_3UTR	0,04	1,00
rs6078022	rs6078022	20	1155854	RSPO4	flanking_3UTR	0,04	1,00
rs6134119	rs6134119	20	1158804	RSPO4	flanking_3UTR	0,04	1,00
rs6033024	rs6033024	20	1159472	RSPO4	flanking_3UTR	0,04	1,00
rs8119636	rs8119636	20	1162370	RSPO4	flanking_3UTR	0,04	1,00
rs1217	rs1217	20	1162615	RSPO4	flanking_3UTR	0,04	1,00
rs6108855	rs6108855	20	1169991	RSPO4	flanking_3UTR	0,04	1,00
rs6078095	rs6078095	20	1171788	RSPO4	flanking_3UTR	0,04	1,00
rs11697869	rs11697869	20	1174075	RSPO4	3UTR	0,04	1,00
rs6078117	rs6078117	20	1180222	RSPO4	intron	0,04	1,00
rs6040523	rs6040523	20	1183414	RSPO4	intron	0,04	1,00
rs7266780	rs7266780	20	1183560	RSPO4	intron	0,04	1,00
rs6040555	rs6040555	20	1186321	RSPO4	intron	0,04	1,00
rs203544	rs203544	20	1195784	RSPO4	intron	0,04	1,00
rs397020	rs397020	20	1205886	RSPO4	intron	0,04	1,00
rs6078239	rs6078239	20	1208610	RSPO4	intron	0,04	1,00
rs450739	rs450739	20	1210647	RSPO4	intron	0,04	1,00
rs203534	rs203534	20	1214814	RSPO4	intron	0,04	1,00
rs17717241	rs17717241	20	1224774	RSPO4	intron	0,04	1,00
rs7271372	rs7271372	20	1233893	RSPO4	intron	0,04	1,00
rs1407766	rs1407766	20	1248286	RSPO4	flanking_5UTR	0,04	1,00
rs6134424	rs6134424	20	1250463	RSPO4	flanking_5UTR	0,04	1,00
rs6074376	rs6074376	20	1255478	RSPO4	flanking_5UTR	0,04	1,00
rs3795144	rs3795144	20	1261930	RSPO4	flanking_5UTR	0,04	1,00
rs966846	rs966846	20	1266403	RSPO4	flanking_5UTR	0,04	1,00
rs1040974	rs1040974	20	1268250	RSPO4	flanking_5UTR	0,04	1,00
rs6033330	rs6033330	20	1269588	RSPO4	flanking_5UTR	0,04	1,00
rs4814078	rs4814078	20	1278770	RSPO4	flanking_5UTR	0,04	1,00
rs3818331	rs3818331	20	1281685	RSPO4	flanking_5UTR	0,04	1,00
rs7354385	rs7354385	20	1283523	PSMF1	flanking_5UTR	0,04	1,00
rs3764713	rs3764713	20	1287251	PSMF1	flanking_5UTR	0,04	1,00
rs13163	rs13163	20	1289585	PSMF1	flanking_5UTR	0,04	1,00
rs4814111	rs4814111	20	1292989	PSMF1	flanking_5UTR	0,04	1,00
rs1048621	rs1048621	20	1293046	PSMF1	flanking_5UTR	0,04	1,00
rs2273959	rs2273959	20	1293247	PSMF1	flanking_5UTR	0,04	1,00
rs6033417	rs6033417	20	1296811	PSMF1	intron	0,04	1,00
rs1018575	rs1018575	20	1298397	PSMF1	flanking_5UTR	0,04	1,00
rs6041386	rs6041386	20	1300456	PSMF1	intron	0,04	1,00
rs6109437	rs6109437	20	1301598	PSMF1	intron	0,04	1,00
rs4319993	rs4319993	20	1302727	PSMF1	intron	0,04	1,00
rs6041420	rs6041420	20	1304120	PSMF1	coding	0,04	1,00
rs754363	rs754363	20	1305272	PSMF1	intron	0,04	1,00
rs3764712	rs3764712	20	1313762	PSMF1	intron	0,04	1,00
rs6041524	rs6041524	20	1318214	PSMF1	intron	0,04	1,00
rs6131399	rs6131399	20	1336654	PSMF1	intron	0,04	1,00
rs6078807	rs6078807	20	1340390	PSMF1	intron	0,04	1,00
rs912116	rs912116	20	1343807	PSMF1	intron	0,04	1,00
rs6041717	rs6041717	20	1344974	PSMF1	intron	0,04	1,00
rs6109623	rs6109623	20	1346596	PSMF1	flanking_3UTR	0,04	1,00
rs6134733	rs6134733	20	1349052	C20orf46	flanking_3UTR	0,04	1,00
rs1062369	rs1062369	20	1349682	C20orf46	flanking_3UTR	0,04	1,00
rs1803585	rs1803585	20	1350123	C20orf46	flanking_3UTR	0,04	1,00
rs11550411	rs11550411	20	1350376	C20orf46	intron	0,04	1,00
rs6041827	rs6041827	20	1358272	C20orf46	intron	0,04	1,00
rs747611	rs747611	20	1363295	C20orf46	flanking_5UTR	0,04	1,00
rs6041884	rs6041884	20	1364598	C20orf46	flanking_5UTR	0,04	1,00
rs1294689	rs1294689	20	1369198	C20orf46	flanking_5UTR	0,04	1,00
rs1294690	rs1294690	20	1371697	LOC400831	flanking_5UTR	0,04	1,00
rs6041970	rs6041970	20	1376444	LOC400831	flanking_5UTR	0,04	1,00
rs6042018	rs6042018	20	1384298	LOC400831	flanking_5UTR	0,04	1,00
rs1474879	rs1474879	20	1386473	LOC400831	intron	0,04	1,00
rs4814230	rs4814230	20	1388312	LOC400831	flanking_3UTR	0,04	1,00
rs6079055	rs6079055	20	1393861	LOC642636	flanking_5UTR	0,04	1,00
rs6042158	rs6042158	20	1400227	LOC642636	intron	0,04	1,00
rs6042209	rs6042209	20	1406212	LOC642636	coding	0,04	1,00
rs1884389	rs1884389	20	1410582	LOC642636	coding	0,04	1,00
rs910619	rs910619	20	1416521	LOC642636	intron	0,04	1,00
rs6109989	rs6109989	20	1416737	LOC642636	intron	0,04	1,00
rs10485823	rs10485823	20	1419846	SNPH	flanking_5UTR	0,04	1,00
rs910620	rs910620	20	1425078	LOC642636	flanking_3UTR	0,04	1,00
rs3829698	rs3829698	20	1430550	SNPH	flanking_5UTR	0,04	1,00
rs4546067	rs4546067	20	1438230	SNPH	intron	0,04	1,00
rs2024799	rs2024799	20	1445821	SNPH	intron	0,04	1,00
rs1884393	rs1884393	20	1456079	SNPH	intron	0,04	1,00
rs6042507	rs6042507	20	1459060	SNPH	intron	0,04	1,00
rs6079325	rs6079325	20	1467917	SNPH	intron	0,04	1,00
rs6042568	rs6042568	20	1470343	SNPH	intron	0,04	1,00
rs715217	rs715217	20	1472408	SNPH	intron	0,04	1,00
rs6042592	rs6042592	20	1474132	SNPH	intron	0,04	1,00
rs6135095	rs6135095	20	1474405	SNPH	intron	0,04	1,00
rs6042667	rs6042667	20	1483926	SNPH	intron	0,04	1,00
rs6074730	rs6074730	20	1493263	SNPH	3UTR	0,04	1,00
rs2422579	rs2422579	20	1494464	SNPH	3UTR	0,04	1,00
rs8182997	rs8182997	20	1497623	SDCBP2	coding	0,04	1,00
rs4813157	rs4813157	20	1499127	SDCBP2	coding	0,04	1,00
rs10485824	rs10485824	20	1518100	SDCBP2	coding	0,04	1,00
rs6034006	rs6034006	20	1519511	SDCBP2	intron	0,04	1,00
rs6034039	rs6034039	20	1529499	SDCBP2	intron	0,04	1,00
rs2249317	rs2249317	20	1532595	SDCBP2	intron	0,04	1,00
rs2249431	rs2249431	20	1533205	SDCBP2	intron	0,04	1,00
rs6043374	rs6043374	20	1609952	FKBP1A	flanking_3UTR	0,04	1,00
rs3746721	rs3746721	20	1610894	FKBP1A	flanking_3UTR	0,04	1,00
rs6043388	rs6043388	20	1612491	FKBP1A	3UTR	0,04	1,00
rs2318044	rs2318044	20	1614288	FKBP1A	3UTR	0,04	1,00
rs963168	rs963168	20	1638578	FKBP1A	3UTR	0,04	1,00
rs6043583	rs6043583	20	1639169	FKBP1A	intron	0,04	1,00
rs4814413	rs4814413	20	1642302	FKBP1A	intron	0,04	1,00
rs6110838	rs6110838	20	1645502	FKBP1A	intron	0,04	1,00
rs6110853	rs6110853	20	1650040	FKBP1A	intron	0,04	1,00
rs2273331	rs2273331	20	1650577	FKBP1A	intron	0,04	1,00
rs2247082	rs2247082	20	1653863	FKBP1A	flanking_5UTR	0,04	1,00
rs6034368	rs6034368	20	1658258	FKBP1A	flanking_5UTR	0,04	1,00
rs202548	rs202548	20	1662999	FKBP1A	flanking_5UTR	0,04	1,00
rs202546	rs202546	20	1663539	FKBP1A	flanking_5UTR	0,04	1,00
rs202481	rs202481	20	1679289	FKBP1A	flanking_5UTR	0,04	1,00
rs599837	rs599837	20	1689557	NSFL1C	flanking_3UTR	0,04	1,00
rs743082	rs743082	20	1690191	NSFL1C	flanking_3UTR	0,04	1,00
rs202493	rs202493	20	1693713	NSFL1C	flanking_3UTR	0,04	1,00
rs6135782	rs6135782	20	1704114	NSFL1C	flanking_3UTR	0,04	1,00
rs202456	rs202456	20	1714362	NSFL1C	flanking_3UTR	0,04	1,00
rs6135817	rs6135817	20	1715448	NSFL1C	flanking_3UTR	0,04	1,00
rs622259	rs622259	20	1726903	NSFL1C	intron	0,04	1,00
rs480355	rs480355	20	1727401	NSFL1C	intron	0,04	1,00
rs619145	rs619145	20	1727507	NSFL1C	intron	0,04	1,00
rs6034677	rs6034677	20	1741300	NSFL1C	intron	0,04	1,00
rs202490	rs202490	20	1748126	SIRPB2	3UTR	0,04	1,00
rs6080550	rs6080550	20	1759590	SIRPB2	coding	0,04	1,00
rs200885	rs200885	20	1767896	SIRPB2	intron	0,04	1,00
rs6111448	rs6111448	20	1770607	SIRPB2	intron	0,04	1,00
rs200880	rs200880	20	1776193	SIRPB2	flanking_5UTR	0,03	1,00
rs200875	rs200875	20	1781754	SIRPB2	flanking_5UTR	0,03	1,00
rs200894	rs200894	20	1789827	SIRPB2	flanking_5UTR	0,03	1,00
rs200891	rs200891	20	1791920	SIRPB2	flanking_5UTR	0,03	1,00
rs58532	rs58532	20	1792434	LOC642697	flanking_3UTR	0,03	1,00
rs200888	rs200888	20	1796461	LOC642697	flanking_3UTR	0,03	1,00
rs6034870	rs6034870	20	1815620	LOC642697	intron	0,03	1,00
rs156331	rs156331	20	1826988	LOC642697	intron	0,03	1,00
rs6034909	rs6034909	20	1832655	SIRPD	intron	0,03	1,00
rs6045464	rs6045464	20	1907716	SIRPB1	intron	0,03	1,00
rs2267916	rs2267916	20	1912310	SIRPB1	intron	0,03	1,00
rs2284295	rs2284295	20	1912981	SIRPB1	intron	0,03	1,00
rs2143541	rs2143541	20	1916732	SIRPB1	coding	0,03	1,00
rs3828016	rs3828016	20	1917290	SIRPG	3UTR	0,03	1,00
cnvi0010434	cnvi0010434	20	1918014	SIRPG	coding	0,03	1,00
rs6045550	rs6045550	20	1918951	SIRPG	intron	0,03	1,00
rs6035103	rs6035103	20	1921450	SIRPG	intron	0,03	1,00
rs6132106	rs6132106	20	1924127	SIRPG	flanking_5UTR	0,03	1,00
rs926620	rs926620	20	1925837	SIRPG	flanking_5UTR	0,03	1,00
rs6132109	rs6132109	20	1927515	LOC441938	flanking_3UTR	0,03	1,00
rs4470399	rs4470399	20	1930704	LOC441938	3UTR	0,03	1,00
rs6045615	rs6045615	20	1931582	LOC441938	intron	0,03	1,00
rs2206698	rs2206698	20	1937475	LOC441938	UTR	0,03	1,00
rs12626044	rs12626044	20	1942718	LOC441938	intron	0,03	1,00
rs910077	rs910077	20	1945956	LOC441938	intron	0,03	1,00
rs6112177	rs6112177	20	1949127	LOC441938	intron	0,03	1,00
rs6045733	rs6045733	20	1950858	LOC441938	intron	0,03	1,00
rs7264572	rs7264572	20	1953270	LOC441938	intron	0,03	1,00
rs6132153	rs6132153	20	1958145	LOC441938	intron	0,03	1,00
rs6045824	rs6045824	20	1961977	LOC441938	intron	0,03	1,00
rs6045868	rs6045868	20	1967278	LOC441938	intron	0,03	1,00
rs6035239	rs6035239	20	1967321	LOC441938	intron	0,03	1,00
rs2235751	rs2235751	20	1969934	LOC441938	intron	0,03	1,00
rs2281285	rs2281285	20	1972460	LOC441938	intron	0,03	1,00
rs2206699	rs2206699	20	1985050	LOC441938	flanking_5UTR	0,03	1,00
rs2422670	rs2422670	20	1988682	LOC441938	flanking_5UTR	0,03	1,00
rs6035312	rs6035312	20	1988915	LOC441938	flanking_5UTR	0,03	1,00
rs2422671	rs2422671	20	1989383	LOC441938	flanking_5UTR	0,03	1,00
rs6081597	rs6081597	20	1995534	LOC441938	flanking_5UTR	0,03	1,00
rs10211836	rs10211836	20	1998187	LOC441938	flanking_5UTR	0,03	1,00
rs6035351	rs6035351	20	1999622	LOC441938	flanking_5UTR	0,03	1,00
rs6046138	rs6046138	20	2000810	LOC441938	flanking_5UTR	0,03	1,00
rs8121495	rs8121495	20	2001015	LOC441938	flanking_5UTR	0,03	1,00
rs6515016	rs6515016	20	2001161	LOC441938	flanking_5UTR	0,03	1,00
rs3944890	rs3944890	20	2010334	LOC441938	flanking_5UTR	0,03	1,00
rs6112537	rs6112537	20	2024972	LOC441938	flanking_5UTR	0,03	1,00
rs6136826	rs6136826	20	2026068	LOC441938	flanking_5UTR	0,03	1,00
rs8126088	rs8126088	20	2028980	LOC728018	flanking_3UTR	0,03	1,00
rs869220	rs869220	20	2033627	LOC728018	flanking_3UTR	0,03	1,00
rs6081765	rs6081765	20	2035775	LOC728018	flanking_3UTR	0,03	1,00
rs6046373	rs6046373	20	2037867	LOC728018	flanking_3UTR	0,03	1,00
rs6081825	rs6081825	20	2047966	LOC728018	flanking_3UTR	0,03	1,00
rs4405822	rs4405822	20	2050481	LOC728018	flanking_3UTR	0,03	1,00
rs6112747	rs6112747	20	2059834	LOC728018	flanking_3UTR	0,03	1,00
rs4814966	rs4814966	20	2074922	SIRPA	intron	0,03	1,00
rs4814973	rs4814973	20	2088222	SIRPA	intron	0,03	1,00
rs6081995	rs6081995	20	2094304	SIRPA	intron	0,03	1,00
rs6075668	rs6075668	20	2103264	SIRPA	intron	0,03	1,00
rs6137102	rs6137102	20	2121228	SIRPA	coding	0,03	1,00
rs6113005	rs6113005	20	2130371	SIRPA	coding	0,03	1,00
rs6106323	rs6106323	20	2149678	SIRPA	intron	0,04	1,00
rs1610305	rs1610305	20	2152057	SIRPA	intron	0,04	1,00
rs1590202	rs1590202	20	2162656	SIRPA	intron	0,04	1,00
rs16982273	rs16982273	20	2163414	SIRPA	intron	0,04	1,00
rs6106338	rs6106338	20	2164115	SIRPA	intron	0,04	1,00
rs6113161	rs6113161	20	2171649	SIRPA	coding	0,04	1,00
rs911132	rs911132	20	2174119	SIRPA	3UTR	0,04	1,00
rs6075784	rs6075784	20	2177885	SIRPA	flanking_3UTR	0,04	1,00
rs6035842	rs6035842	20	2183608	SIRPA	flanking_3UTR	0,04	1,00
rs6075795	rs6075795	20	2187430	LOC727993	flanking_5UTR	0,04	1,00
rs6047425	rs6047425	20	2193014	LOC727993	flanking_5UTR	0,04	1,00
rs6137352	rs6137352	20	2198288	LOC727993	intron	0,04	1,00
rs6082438	rs6082438	20	2204811	LOC727993	intron	0,04	1,00
rs4428078	rs4428078	20	2391153	STK35	flanking_3UTR	0,04	1,00
rs1004269	rs1004269	20	2397656	LOC388780	flanking_5UTR	0,04	1,00
rs10485600	rs10485600	20	2400503	LOC388780	flanking_5UTR	0,04	1,00
rs6048880	rs6048880	20	2407441	LOC388780	flanking_5UTR	0,04	1,00
rs6048961	rs6048961	20	2415857	LOC388780	flanking_5UTR	0,04	1,00
rs6048966	rs6048966	20	2416977	LOC388780	flanking_5UTR	0,04	1,00
rs4815227	rs4815227	20	2421742	LOC388780	flanking_5UTR	0,04	1,00
rs6049212	rs6049212	20	2442022	LOC388780	flanking_3UTR	0,04	1,00
rs6076161	rs6076161	20	2444744	LOC388780	flanking_3UTR	0,04	1,00
rs1109009	rs1109009	20	2457788	LOC388780	flanking_3UTR	0,04	1,00
rs1109010	rs1109010	20	2457887	LOC388780	flanking_3UTR	0,04	1,00
rs4815266	rs4815266	20	2458160	LOC388780	flanking_3UTR	0,04	1,00
rs6076199	rs6076199	20	2471755	LOC388780	flanking_3UTR	0,04	1,00
rs6083460	rs6083460	20	2476631	LOC388780	flanking_3UTR	0,04	1,00
rs6114605	rs6114605	20	2481263	LOC388780	flanking_3UTR	0,04	1,00
rs6083505	rs6083505	20	2488753	TGM3	flanking_5UTR	0,04	1,00
rs6036759	rs6036759	20	2491209	TGM3	flanking_5UTR	0,04	1,00
rs6083536	rs6083536	20	2501632	TGM3	flanking_5UTR	0,04	1,00
rs6114789	rs6114789	20	2511030	TGM3	flanking_5UTR	0,04	1,00
rs6076243	rs6076243	20	2514558	TGM3	flanking_5UTR	0,04	1,00
rs6049839	rs6049839	20	2518565	TGM3	flanking_5UTR	0,04	1,00
rs6050063	rs6050063	20	2539387	TGM3	flanking_5UTR	0,04	1,00
rs6036974	rs6036974	20	2543804	TGM3	flanking_5UTR	0,04	1,00
rs6083683	rs6083683	20	2545219	TGM3	coding	0,04	1,00
rs4815352	rs4815352	20	2549008	TGM3	coding	0,04	1,00
rs767739	rs767739	20	2550579	TGM3	intron	0,04	1,00
rs2422788	rs2422788	20	2552634	TGM3	intron	0,04	1,00
rs11908093	rs11908093	20	2552884	TGM3	intron	0,04	1,00
rs6115073	rs6115073	20	2570208	TGM3	intron	0,04	1,00
rs6050455	rs6050455	20	2574223	TGM3	intron	0,04	1,00
rs6037081	rs6037081	20	2580772	TGM3	intron	0,04	1,00
rs2207154	rs2207154	20	2589686	TGM3	3UTR	0,04	1,00
rs1883979	rs1883979	20	2590917	TGM3	flanking_3UTR	0,04	1,00
rs10485601	rs10485601	20	2594190	TGM3	flanking_3UTR	0,04	1,00
rs6115181	rs6115181	20	2594254	TGM3	flanking_3UTR	0,04	1,00
rs6515654	rs6515654	20	2599121	TGM3	flanking_3UTR	0,04	1,00
rs6050664	rs6050664	20	2605308	TGM3	flanking_3UTR	0,04	1,00
rs6050670	rs6050670	20	2606116	TGM3	flanking_3UTR	0,04	1,00
rs996708	rs996708	20	2610285	TGM3	flanking_3UTR	0,04	1,00
rs7270022	rs7270022	20	2615108	TGM6	flanking_5UTR	0,04	1,00
rs6083931	rs6083931	20	2625120	TGM6	flanking_5UTR	0,04	1,00
rs2422821	rs2422821	20	2630311	TGM6	flanking_5UTR	0,04	1,00
rs2273137	rs2273137	20	2635212	TGM6	intron	0,04	1,00
rs2325899	rs2325899	20	2639806	TGM6	intron	0,04	1,00
rs6132905	rs6132905	20	2647040	TGM6	intron	0,04	1,00
rs6051076	rs6051076	20	2650958	TGM6	intron	0,04	1,00
rs1810636	rs1810636	20	2654925	TGM6	coding	0,04	1,00
rs6051098	rs6051098	20	2656328	TGM6	intron	0,04	1,00
rs6051100	rs6051100	20	2656495	TGM6	intron	0,04	1,00
rs6037336	rs6037336	20	2667729	TGM6	intron	0,04	1,00
rs4141589	rs4141589	20	2682206	TGM6	intron	0,04	1,00
rs4815533	rs4815533	20	2684924	TGM6	intron	0,04	1,00
rs6084136	rs6084136	20	2693625	TGM6	flanking_3UTR	0,04	1,00
rs6076426	rs6076426	20	2694156	TGM6	flanking_3UTR	0,04	1,00
rs1883808	rs1883808	20	2703692	TGM6	flanking_3UTR	0,04	1,00
rs6084148	rs6084148	20	2712329	TGM6	flanking_3UTR	0,04	1,00
rs1028408	rs1028408	20	2721474	TGM6	flanking_3UTR	0,04	1,00
rs4815541	rs4815541	20	2725678	SNRPB	flanking_3UTR	0,04	1,00
rs16990611	rs16990611	20	2728570	SNRPB	flanking_3UTR	0,04	1,00
rs2073126	rs2073126	20	2728985	SNRPB	intron	0,04	1,00
rs6084151	rs6084151	20	2733894	ZNF343	flanking_3UTR	0,04	1,00
rs1005304	rs1005304	20	2735182	ZNF343	flanking_3UTR	0,04	1,00
rs4813616	rs4813616	20	2747481	ZNF343	flanking_3UTR	0,04	1,00
rs2281316	rs2281316	20	2751341	ZNF343	intron	0,04	1,00
rs215523	rs215523	20	2760705	ZNF343	intron	0,04	1,00
rs215536	rs215536	20	2772495	ZNF343	intron	0,04	1,00
rs6051397	rs6051397	20	2772654	ZNF343	intron	0,04	1,00
rs215542	rs215542	20	2779747	ZNF343	flanking_5UTR	0,04	1,00
rs215543	rs215543	20	2780151	ZNF343	flanking_5UTR	0,04	1,00
rs215551	rs215551	20	2785279	TMC2	flanking_5UTR	0,04	1,00
rs127073	rs127073	20	2787994	TMC2	flanking_5UTR	0,04	1,00
rs215560	rs215560	20	2795625	TMC2	intron	0,04	1,00
rs4815546	rs4815546	20	2801409	TMC2	coding	0,04	1,00
rs1329269	rs1329269	20	2810098	TMC2	intron	0,04	1,00
rs6084184	rs6084184	20	2812772	TMC2	intron	0,04	1,00
rs873711	rs873711	20	2827468	TMC2	intron	0,04	1,00
rs677344	rs677344	20	2846289	TMC2	intron	0,04	1,00
rs555502	rs555502	20	2846397	TMC2	intron	0,04	1,00
rs622601	rs622601	20	2855466	TMC2	coding	0,04	1,00
rs7262267	rs7262267	20	2865976	TMC2	intron	0,04	1,00
rs6138929	rs6138929	20	2873970	TMC2	intron	0,04	1,00
rs6138952	rs6138952	20	2901540	TMC2	intron	0,04	1,00
rs6084203	rs6084203	20	2910044	TMC2	intron	0,04	1,00
rs1741731	rs1741731	20	2930770	TMC2	intron	0,04	1,00
rs1178027	rs1178027	20	2945759	TMC2	intron	0,04	1,00
rs3787478	rs3787478	20	2959298	TMC2	intron	0,04	1,00
rs6037443	rs6037443	20	2961408	TMC2	intron	0,04	1,00
rs6084229	rs6084229	20	2978928	TMC2	intron	0,04	1,00
rs6133002	rs6133002	20	2991560	TMC2	intron	0,04	1,00
rs2277756	rs2277756	20	3003027	TMC2	intron	0,04	1,00
rs561059	rs561059	20	3011175	TMC2	intron	0,04	1,00
rs654750	rs654750	20	3011188	TMC2	flanking_3UTR	0,04	1,00
rs2296236	rs2296236	20	3020090	NOL5A	flanking_5UTR	0,04	1,00
rs1034063	rs1034063	20	3031832	NOL5A	coding	0,04	1,00
rs6076466	rs6076466	20	3034048	IDH3B	intron	0,04	1,00
rs8184236	rs8184236	20	3039115	IDH3B	flanking_5UTR	0,04	1,00
rs877172	rs877172	20	3049890	IDH3B	flanking_5UTR	0,04	1,00
rs2740210	rs2740210	20	3053255	IDH3B	flanking_5UTR	0,04	1,00
rs4813627	rs4813627	20	3055513	IDH3B	flanking_5UTR	0,04	1,00
rs6084265	rs6084265	20	3070898	IDH3B	flanking_5UTR	0,04	1,00
rs857240	rs857240	20	3075629	EBF4	flanking_5UTR	0,04	1,00
rs857242	rs857242	20	3081101	EBF4	intron	0,04	1,00
rs864140	rs864140	20	3088010	EBF4	intron	0,04	1,00
rs913555	rs913555	20	3090124	EBF4	intron	0,04	1,00
rs306757	rs306757	20	3119133	EBF4	intron	0,04	1,00
rs857252	rs857252	20	3119555	EBF4	intron	0,04	1,00
rs2145222	rs2145222	20	3130175	EBF4	intron	0,04	1,00
rs3827132	rs3827132	20	3138280	EBF4	intron	0,04	1,00
rs6084276	rs6084276	20	3138979	EBF4	intron	0,04	1,00
rs911112	rs911112	20	3144664	EBF4	intron	0,04	1,00
rs11697620	rs11697620	20	3150165	EBF4	intron	0,04	1,00
rs6084282	rs6084282	20	3164110	EBF4	intron	0,04	1,00
rs2295545	rs2295545	20	3164686	EBF4	intron	0,04	1,00
rs7260785	rs7260785	20	3165057	EBF4	flanking_3UTR	0,04	1,00
rs8120592	rs8120592	20	3166259	EBF4	flanking_3UTR	0,04	1,00
rs6084288	rs6084288	20	3173666	CPXM1	flanking_3UTR	0,04	1,00
rs6051639	rs6051639	20	3180283	CPXM1	flanking_3UTR	0,04	1,00
rs6084306	rs6084306	20	3193617	CPXM1	flanking_3UTR	0,04	1,00
rs8362	rs8362	20	3193978	CPXM1	intron	0,04	1,00
rs3810560	rs3810560	20	3207819	CPXM1	intron	0,04	1,00
rs6139039	rs6139039	20	3210692	CPXM1	flanking_5UTR	0,04	1,00
rs6084312	rs6084312	20	3211235	CPXM1	flanking_5UTR	0,04	1,00
rs3827075	rs3827075	20	3214819	C20orf141	flanking_5UTR	0,04	1,00
rs6037513	rs6037513	20	3223225	LOC728109	flanking_3UTR	0,04	1,00
rs1207	rs1207	20	3231134	FAM113A	flanking_3UTR	0,04	1,00
rs3310	rs3310	20	3237232	FAM113A	flanking_3UTR	0,04	1,00
rs6051689	rs6051689	20	3241613	VPS16	intron	0,04	1,00
rs6051693	rs6051693	20	3244449	VPS16	intron	0,04	1,00
rs2326084	rs2326084	20	3251356	VPS16	intron	0,04	1,00
rs6051702	rs6051702	20	3251924	PTPRA	intron	0,04	1,00
rs6084327	rs6084327	20	3271855	PTPRA	intron	0,04	1,00
rs6051727	rs6051727	20	3287121	PTPRA	intron	0,04	1,00
rs976041	rs976041	20	3325420	PTPRA	intron	0,04	1,00
cnvi0010437	cnvi0010437	20	3341194	PTPRA	intron	0,04	1,00
rs6115860	rs6115860	20	3341355	PTPRA	intron	0,04	1,00
rs6051789	rs6051789	20	3342754	PTPRA	coding	0,04	1,00
rs2092991	rs2092991	20	3346954	PTPRA	intron	0,04	1,00
rs750702	rs750702	20	3355228	PTPRA	intron	0,04	1,00
rs6115865	rs6115865	20	3359303	PTPRA	intron	0,04	1,00
rs965469	rs965469	20	3381549	PTPRA	intron	0,04	1,00
rs6051841	rs6051841	20	3392871	PTPRA	intron	0,04	1,00
rs6051855	rs6051855	20	3409126	PTPRA	intron	0,04	1,00
rs6115892	rs6115892	20	3411569	PTPRA	intron	0,04	1,00
rs6051863	rs6051863	20	3416845	PTPRA	flanking_3UTR	0,04	1,00
rs6076519	rs6076519	20	3431140	MRPS26	flanking_3UTR	0,04	1,00
rs979332	rs979332	20	3433158	MRPS26	flanking_3UTR	0,04	1,00
rs6076520	rs6076520	20	3434010	MRPS26	flanking_3UTR	0,04	1,00
rs11696647	rs11696647	20	3450635	OXT	flanking_5UTR	0,04	1,00
rs1552323	rs1552323	20	3450811	OXT	flanking_3UTR	0,04	1,00
rs6076524	rs6076524	20	3452447	OXT	flanking_3UTR	0,04	1,00
rs171165	rs171165	20	3457616	LOC642991	flanking_5UTR	0,04	1,00
rs239096	rs239096	20	3458260	LOC642991	flanking_3UTR	0,04	1,00
rs238736	rs238736	20	3462333	LOC642991	flanking_3UTR	0,04	1,00
rs238723	rs238723	20	3470066	UBOX5	flanking_3UTR	0,04	1,00
rs11558155	rs11558155	20	3470825	UBOX5	3UTR	0,04	1,00
rs6115922	rs6115922	20	3471336	FASTKD5	flanking_3UTR	0,04	1,00
rs238722	rs238722	20	3471971	FASTKD5	flanking_3UTR	0,04	1,00
cnvi0010441	cnvi0010441	20	3476259	FASTKD5	intron	0,04	1,00
cnvi0010442	cnvi0010442	20	3481581	FASTKD5	intron	0,04	1,00
rs237405	rs237405	20	3495935	FASTKD5	intron	0,04	1,00
cnvi0010443	cnvi0010443	20	3498162	ProSAPiP1	3UTR	0,04	1,00
cnvi0010444	cnvi0010444	20	3498493	ProSAPiP1	flanking_5UTR	0,04	1,00
cnvi0010445	cnvi0010445	20	3498816	C20orf116	flanking_3UTR	0,04	1,00
rs151518	rs151518	20	3515924	C20orf116	flanking_3UTR	0,04	1,00
rs2853218	rs2853218	20	3520496	C20orf116	flanking_3UTR	0,04	1,00
cnvi0010446	cnvi0010446	20	3567210	C20orf116	flanking_3UTR	0,04	1,00
cnvi0010447	cnvi0010447	20	3567421	C20orf116	intron	0,04	1,00
rs6051960	rs6051960	20	3567429	C20orf116	intron	0,04	1,00
rs3886999	rs3886999	20	3577062	ITPA	intron	0,04	1,00
rs622099	rs622099	20	3580168	ITPA	coding	0,04	1,00
rs667358	rs667358	20	3582030	SLC4A11	flanking_3UTR	0,04	1,00
rs616641	rs616641	20	3585602	SLC4A11	intron	0,04	1,00
rs596720	rs596720	20	3597874	SLC4A11	coding	0,04	1,00
rs2252091	rs2252091	20	3598451	SLC4A11	coding	0,04	1,00
rs235523	rs235523	20	3599516	SLC4A11	flanking_5UTR	0,04	1,00
rs2064945	rs2064945	20	3604754	SLC4A11	flanking_5UTR	0,04	1,00
rs6051991	rs6051991	20	3619384	SLC4A11	flanking_5UTR	0,04	1,00
rs434222	rs434222	20	3628918	SLC4A11	flanking_5UTR	0,04	1,00
rs6084432	rs6084432	20	3643653	SLC4A11	flanking_5UTR	0,04	1,00
rs512625	rs512625	20	3648378	SLC4A11	flanking_5UTR	0,04	1,00
rs487377	rs487377	20	3658931	SLC4A11	flanking_5UTR	0,04	1,00
rs554743	rs554743	20	3662142	SLC4A11	flanking_5UTR	0,04	1,00
rs2853215	rs2853215	20	3666255	SLC4A11	flanking_5UTR	0,04	1,00
rs3746634	rs3746634	20	3670061	SLC4A11	flanking_5UTR	0,04	1,00
rs4815596	rs4815596	20	3671800	C20orf194	intron	0,04	1,00
rs3746638	rs3746638	20	3675333	ATRN	flanking_5UTR	0,04	1,00
rs709012	rs709012	20	3675498	ATRN	flanking_5UTR	0,04	1,00
rs12624922	rs12624922	20	3680280	ATRN	flanking_5UTR	0,04	1,00
rs6139180	rs6139180	20	3681283	ATRN	flanking_5UTR	0,04	1,00
rs611847	rs611847	20	3684022	ATRN	flanking_5UTR	0,04	1,00
rs625372	rs625372	20	3684729	ATRN	flanking_5UTR	0,04	1,00
rs6037651	rs6037651	20	3686436	ATRN	flanking_5UTR	0,04	1,00
rs735710	rs735710	20	3692839	ATRN	flanking_5UTR	0,04	1,00
rs1018491	rs1018491	20	3701132	ATRN	flanking_5UTR	0,04	1,00
rs4815600	rs4815600	20	3706863	ATRN	flanking_5UTR	0,04	1,00
rs580502	rs580502	20	3711864	ATRN	flanking_5UTR	0,04	1,00
rs509764	rs509764	20	3716457	ATRN	flanking_5UTR	0,04	1,00
rs862832	rs862832	20	3720701	ATRN	flanking_5UTR	0,04	1,00
rs6139191	rs6139191	20	3724708	ATRN	flanking_5UTR	0,04	1,00
rs910652	rs910652	20	3727970	ATRN	flanking_5UTR	0,04	1,00
rs674110	rs674110	20	3728026	ATRN	intron	0,04	1,00
rs2295343	rs2295343	20	3735601	ATRN	intron	0,04	1,00
rs658495	rs658495	20	3737495	ATRN	intron	0,04	1,00
rs683808	rs683808	20	3749886	ATRN	intron	0,04	1,00
rs13043330	rs13043330	20	3756597	ATRN	intron	0,04	1,00
rs2281479	rs2281479	20	3762095	ATRN	intron	0,04	1,00
rs1010608	rs1010608	20	3784593	ATRN	flanking_5UTR	0,04	1,00
rs2295348	rs2295348	20	3785034	ATRN	flanking_5UTR	0,04	1,00
rs4813643	rs4813643	20	3787755	ATRN	intron	0,04	1,00
rs11570030	rs11570030	20	3788194	ATRN	flanking_5UTR	0,04	1,00
rs2282128	rs2282128	20	3792226	ATRN	flanking_5UTR	0,04	1,00
rs12481679	rs12481679	20	3794183	ATRN	flanking_5UTR	0,04	1,00
rs6052093	rs6052093	20	3799390	ATRN	coding	0,04	1,00
rs6052096	rs6052096	20	3803596	ATRN	intron	0,04	1,00
rs6037671	rs6037671	20	3807608	ATRN	intron	0,04	1,00
rs6052105	rs6052105	20	3811433	ATRN	intron	0,04	1,00
rs6084488	rs6084488	20	3815654	ATRN	intron	0,04	1,00
rs4815617	rs4815617	20	3827309	ATRN	coding	0,04	1,00
rs6116065	rs6116065	20	3829667	ATRN	intron	0,04	1,00
rs8116776	rs8116776	20	3838807	ATRN	intron	0,04	1,00
rs6133067	rs6133067	20	3839754	ATRN	intron	0,04	1,00
rs7262903	rs7262903	20	3843027	ATRN	intron	0,04	1,00
rs914294	rs914294	20	3843393	ATRN	intron	0,04	1,00
rs6052130	rs6052130	20	3843668	ATRN	intron	0,04	1,00
rs7269320	rs7269320	20	3846397	ATRN	intron	0,04	1,00
rs3746660	rs3746660	20	3846843	ATRN	intron	0,04	1,00
rs7267297	rs7267297	20	3853420	ATRN	3UTR	0,04	1,00
rs6052140	rs6052140	20	3862208	GFRA4	intron	0,04	1,00
rs6052147	rs6052147	20	3868355	ADAM33	flanking_3UTR	0,04	1,00
rs6084506	rs6084506	20	3870932	ADAM33	intron	0,04	1,00
rs4815621	rs4815621	20	3878038	ADAM33	intron	0,04	1,00
rs6084513	rs6084513	20	3897014	SIGLEC1	flanking_3UTR	0,04	1,00
rs241606	rs241606	20	3915885	SIGLEC1	intron	0,04	1,00
rs241623	rs241623	20	3921964	SIGLEC1	intron	0,04	1,00
rs241630	rs241630	20	3925248	SIGLEC1	coding	0,04	1,00
rs6084530	rs6084530	20	3934766	SIGLEC1	coding	0,04	1,00
rs2253977	rs2253977	20	3939140	SIGLEC1	intron	0,04	1,00
rs2300216	rs2300216	20	3946057	SIGLEC1	intron	0,04	1,00
rs6052209	rs6052209	20	3961747	SIGLEC1	coding	0,04	1,00
rs998132	rs998132	20	3965054	SIGLEC1	coding	0,04	1,00
rs6107386	rs6107386	20	3972756	SIGLEC1	coding	0,04	1,00
rs2078382	rs2078382	20	3975106	SIGLEC1	flanking_5UTR	0,04	1,00
rs1028366	rs1028366	20	3985917	HSPA12B	flanking_5UTR	0,04	1,00
rs6107393	rs6107393	20	3987738	HSPA12B	flanking_5UTR	0,04	1,00
rs2143234	rs2143234	20	3994609	HSPA12B	flanking_5UTR	0,04	1,00
rs6052257	rs6052257	20	4018579	HSPA12B	intron	0,04	1,00
rs6139278	rs6139278	20	4039627	HSPA12B	intron	0,04	1,00
rs6076595	rs6076595	20	4040828	HSPA12B	intron	0,04	1,00
rs6076598	rs6076598	20	4043286	C20orf27	intron	0,04	1,00
rs6037744	rs6037744	20	4049691	C20orf27	intron	0,04	1,00
rs4815641	rs4815641	20	4053690	C20orf27	flanking_5UTR	0,04	1,00
rs945763	rs945763	20	4056123	SPEF1	flanking_3UTR	0,04	1,00
rs6116189	rs6116189	20	4063862	SPEF1	5UTR	0,04	1,00
rs17290928	rs17290928	20	4073275	CENPB	flanking_3UTR	0,04	1,00
rs6076612	rs6076612	20	4073370	CENPB	flanking_5UTR	0,04	1,00
rs2095639	rs2095639	20	4075290	CDC25B	intron	0,04	1,00
rs4815646	rs4815646	20	4079151	CDC25B	intron	0,04	1,00
rs6116201	rs6116201	20	4085758	CDC25B	flanking_3UTR	0,04	1,00
rs4815651	rs4815651	20	4087050	CDC25B	flanking_3UTR	0,04	1,00
rs4813669	rs4813669	20	4092860	CDC25B	flanking_3UTR	0,04	1,00
rs4815660	rs4815660	20	4095716	C20orf29	flanking_5UTR	0,04	1,00
rs16989226	rs16989226	20	4100615	C20orf29	flanking_5UTR	0,04	1,00
rs1741295	rs1741295	20	4104019	C20orf29	intron	0,04	1,00
rs1741340	rs1741340	20	4109544	C20orf29	flanking_3UTR	0,04	1,00
rs1741280	rs1741280	20	4111780	C20orf29	flanking_3UTR	0,04	1,00
rs1741285	rs1741285	20	4116436	C20orf29	flanking_3UTR	0,04	1,00
rs6084644	rs6084644	20	4121799	VISA	flanking_5UTR	0,04	1,00
rs945772	rs945772	20	4129054	VISA	intron	0,04	1,00
rs1765003	rs1765003	20	4135849	VISA	intron	0,04	1,00
rs6076623	rs6076623	20	4136671	VISA	intron	0,04	1,00
rs6139335	rs6139335	20	4140721	VISA	coding	0,04	1,00
rs1741315	rs1741315	20	4155948	VISA	intron	0,04	1,00
rs1741318	rs1741318	20	4157600	VISA	intron	0,04	1,00
rs1741327	rs1741327	20	4164283	VISA	coding	0,04	1,00
rs6139351	rs6139351	20	4167234	VISA	3UTR	0,04	1,00
rs6084657	rs6084657	20	4171497	VISA	flanking_3UTR	0,04	1,00
rs1217369	rs1217369	20	4183819	PANK2	flanking_5UTR	0,04	1,00
rs7262469	rs7262469	20	4184858	PANK2	flanking_5UTR	0,04	1,00
rs1235695	rs1235695	20	4186032	PANK2	intron	0,04	1,00
rs6116265	rs6116265	20	4191058	PANK2	intron	0,04	1,00
rs4408788	rs4408788	20	4195591	PANK2	intron	0,04	1,00
rs734290	rs734290	20	4200595	RNF24	intron	0,04	1,00
rs835880	rs835880	20	4208895	RNF24	intron	0,04	1,00
rs8183794	rs8183794	20	4210448	RNF24	intron	0,04	1,00
rs1556832	rs1556832	20	4215557	RNF24	intron	0,04	1,00
rs6076639	rs6076639	20	4219258	RNF24	intron	0,04	1,00
rs6084670	rs6084670	20	4222509	RNF24	intron	0,04	1,00
rs6052456	rs6052456	20	4225573	RNF24	intron	0,04	1,00
rs6052462	rs6052462	20	4235594	RNF24	intron	0,04	1,00
rs1886844	rs1886844	20	4239658	RNF24	intron	0,04	1,00
rs6107436	rs6107436	20	4251663	RNF24	intron	0,04	1,00
rs4815682	rs4815682	20	4259113	RNF24	intron	0,04	1,00
rs6084686	rs6084686	20	4259841	RNF24	intron	0,04	1,00
rs6052484	rs6052484	20	4260610	RNF24	intron	0,04	1,00
rs4815683	rs4815683	20	4260649	RNF24	flanking_5UTR	0,04	1,00
rs3892507	rs3892507	20	4284877	RNF24	flanking_5UTR	0,04	1,00
rs6139385	rs6139385	20	4285493	RNF24	flanking_5UTR	0,04	1,00
rs4813685	rs4813685	20	4293908	RNF24	flanking_5UTR	0,04	1,00
rs3848815	rs3848815	20	4297569	RNF24	flanking_5UTR	0,04	1,00
rs6076657	rs6076657	20	4301757	RNF24	flanking_5UTR	0,04	1,00
rs4110508	rs4110508	20	4308155	RNF24	flanking_5UTR	0,04	1,00
rs3904873	rs3904873	20	4312031	RNF24	flanking_5UTR	0,04	1,00
rs6052517	rs6052517	20	4315140	RNF24	flanking_5UTR	0,04	1,00
rs6037820	rs6037820	20	4316337	SMOX	flanking_5UTR	0,04	1,00
rs513783	rs513783	20	4324820	SMOX	flanking_5UTR	0,04	1,00
rs636293	rs636293	20	4328509	SMOX	flanking_5UTR	0,04	1,00
rs6076665	rs6076665	20	4334541	SMOX	flanking_5UTR	0,04	1,00
rs159774	rs159774	20	4340694	SMOX	flanking_5UTR	0,04	1,00
rs6139405	rs6139405	20	4346419	SMOX	flanking_5UTR	0,04	1,00
rs159786	rs159786	20	4348440	SMOX	flanking_5UTR	0,04	1,00
rs159788	rs159788	20	4352104	SMOX	flanking_5UTR	0,04	1,00
rs6116326	rs6116326	20	4352738	SMOX	flanking_5UTR	0,04	1,00
rs192717	rs192717	20	4353884	SMOX	flanking_5UTR	0,04	1,00
rs3848821	rs3848821	20	4359816	SMOX	flanking_5UTR	0,04	1,00
rs6139415	rs6139415	20	4378871	SMOX	flanking_5UTR	0,04	1,00
rs3904864	rs3904864	20	4379086	SMOX	flanking_5UTR	0,04	1,00
rs7266768	rs7266768	20	4380585	SMOX	flanking_5UTR	0,04	1,00
rs95045	rs95045	20	4383330	SMOX	flanking_5UTR	0,04	1,00
rs531043	rs531043	20	4387440	SMOX	flanking_5UTR	0,04	1,00
rs297718	rs297718	20	4390527	SMOX	intron	0,04	1,00
rs172470	rs172470	20	4392917	SMOX	intron	0,04	1,00
rs46593	rs46593	20	4393118	SMOX	intron	0,04	1,00
rs212617	rs212617	20	4398587	SMOX	intron	0,04	1,00
rs10485512	rs10485512	20	4406221	SMOX	intron	0,04	1,00
rs192718	rs192718	20	4407665	SMOX	coding	0,04	1,00
rs297737	rs297737	20	4412081	SMOX	intron	0,04	1,00
rs297740	rs297740	20	4416301	hCG_2045830	flanking_5UTR	0,04	1,00
rs402899	rs402899	20	4420450	hCG_2045830	flanking_3UTR	0,04	1,00
rs297672	rs297672	20	4432967	hCG_2045830	flanking_3UTR	0,04	1,00
rs297660	rs297660	20	4453463	ADRA1D	flanking_3UTR	0,04	1,00
rs4465845	rs4465845	20	4454065	ADRA1D	flanking_3UTR	0,04	1,00
rs6133125	rs6133125	20	4459954	ADRA1D	flanking_3UTR	0,04	1,00
rs6139434	rs6139434	20	4460275	ADRA1D	intron	0,04	1,00
rs6133126	rs6133126	20	4461359	ADRA1D	intron	0,04	1,00
rs297741	rs297741	20	4469421	ADRA1D	intron	0,04	1,00
rs6133127	rs6133127	20	4469883	ADRA1D	intron	0,04	1,00
rs297745	rs297745	20	4473609	ADRA1D	intron	0,04	1,00
rs6139439	rs6139439	20	4475430	ADRA1D	intron	0,04	1,00
rs1382035	rs1382035	20	4484638	ADRA1D	flanking_5UTR	0,04	1,00
rs297765	rs297765	20	4487111	ADRA1D	flanking_5UTR	0,04	1,00
rs8115602	rs8115602	20	4493931	ADRA1D	flanking_5UTR	0,04	1,00
rs6116400	rs6116400	20	4506988	ADRA1D	flanking_5UTR	0,04	1,00
rs6107476	rs6107476	20	4513311	ADRA1D	flanking_5UTR	0,04	1,00
rs6037864	rs6037864	20	4514960	ADRA1D	flanking_5UTR	0,04	1,00
rs7268029	rs7268029	20	4518594	ADRA1D	flanking_5UTR	0,04	1,00
rs6133138	rs6133138	20	4520282	ADRA1D	flanking_5UTR	0,04	1,00
rs6139470	rs6139470	20	4521342	ADRA1D	flanking_5UTR	0,04	1,00
rs6076687	rs6076687	20	4529879	ADRA1D	flanking_5UTR	0,04	1,00
rs1547021	rs1547021	20	4534377	ADRA1D	flanking_5UTR	0,04	1,00
rs911165	rs911165	20	4544779	ADRA1D	flanking_5UTR	0,04	1,00
rs4815715	rs4815715	20	4552904	ADRA1D	flanking_5UTR	0,04	1,00
rs6116433	rs6116433	20	4559991	ADRA1D	flanking_5UTR	0,04	1,00
rs2326536	rs2326536	20	4562141	ADRA1D	flanking_5UTR	0,04	1,00
rs6076703	rs6076703	20	4571478	ADRA1D	flanking_5UTR	0,04	1,00
rs6133145	rs6133145	20	4576230	ADRA1D	flanking_5UTR	0,04	1,00
rs6139486	rs6139486	20	4578080	ADRA1D	flanking_5UTR	0,04	1,00
rs6052674	rs6052674	20	4582716	ADRA1D	flanking_5UTR	0,04	1,00
rs6037894	rs6037894	20	4587153	ADRA1D	flanking_5UTR	0,04	1,00
rs961197	rs961197	20	4595503	ADRA1D	flanking_5UTR	0,04	1,00
rs6052697	rs6052697	20	4606491	ADRA1D	flanking_5UTR	0,04	1,00
rs6076707	rs6076707	20	4608341	ADRA1D	flanking_5UTR	0,04	1,00
rs6052699	rs6052699	20	4611877	ADRA1D	flanking_5UTR	0,04	1,00
rs1981105	rs1981105	20	4614486	ADRA1D	flanking_5UTR	0,04	1,00
rs6037908	rs6037908	20	4617391	ADRA1D	flanking_5UTR	0,04	1,00
rs4813709	rs4813709	20	4619157	ADRA1D	flanking_5UTR	0,04	1,00
rs6107503	rs6107503	20	4622734	ADRA1D	flanking_5UTR	0,04	1,00
rs6052725	rs6052725	20	4626878	ADRA1D	flanking_5UTR	0,04	1,00
rs2326509	rs2326509	20	4630299	ADRA1D	flanking_5UTR	0,04	1,00
rs6116466	rs6116466	20	4637168	ADRA1D	flanking_5UTR	0,04	1,00
rs6037922	rs6037922	20	4640974	ADRA1D	flanking_5UTR	0,04	1,00
rs6052751	rs6052751	20	4645073	ADRA1D	flanking_5UTR	0,04	1,00
rs2025115	rs2025115	20	4648538	ADRA1D	flanking_5UTR	0,04	1,00
rs2859720	rs2859720	20	4654585	ADRA1D	flanking_5UTR	0,04	1,00
rs6052761	rs6052761	20	4657017	ADRA1D	flanking_5UTR	0,04	1,00
rs2756271	rs2756271	20	4665262	ADRA1D	flanking_5UTR	0,04	1,00
rs6084833	rs6084833	20	4672759	ADRA1D	flanking_5UTR	0,04	1,00
rs6107516	rs6107516	20	4677092	ADRA1D	flanking_5UTR	0,04	1,00
rs2855412	rs2855412	20	4684718	ADRA1D	flanking_5UTR	0,04	1,00
rs6052778	rs6052778	20	4689236	ADRA1D	flanking_5UTR	0,04	1,00
rs6052787	rs6052787	20	4695812	PRNP	flanking_5UTR	0,04	1,00
rs926106	rs926106	20	4700552	PRNP	flanking_5UTR	0,04	1,00
rs2245220	rs2245220	20	4705718	PRNP	flanking_5UTR	0,04	1,00
rs2756260	rs2756260	20	4709986	PRNP	flanking_5UTR	0,04	1,00
rs6139537	rs6139537	20	4717262	PRNP	flanking_5UTR	0,04	1,00
rs7264576	rs7264576	20	4717456	PRNP	flanking_5UTR	0,04	1,00
rs6052810	rs6052810	20	4722964	PRNP	flanking_5UTR	0,04	1,00
rs6052818	rs6052818	20	4725883	PRNP	flanking_5UTR	0,04	1,00
rs6084859	rs6084859	20	4731359	PRNP	flanking_5UTR	0,04	1,00
rs4143674	rs4143674	20	4741304	PRNP	flanking_5UTR	0,04	1,00
rs2422956	rs2422956	20	4746387	PRNP	flanking_5UTR	0,04	1,00
rs6084884	rs6084884	20	4751293	PRNP	flanking_5UTR	0,04	1,00
rs8114703	rs8114703	20	4754794	PRNP	flanking_5UTR	0,04	1,00
rs6052867	rs6052867	20	4756050	PRNP	flanking_5UTR	0,04	1,00
rs2422970	rs2422970	20	4759039	PRNP	flanking_5UTR	0,04	1,00
rs1535380	rs1535380	20	4759396	PRNP	flanking_5UTR	0,04	1,00
rs2422979	rs2422979	20	4764682	PRNP	flanking_5UTR	0,04	1,00
rs2422982	rs2422982	20	4766197	PRNP	flanking_5UTR	0,04	1,00
rs1998292	rs1998292	20	4773597	PRNP	flanking_5UTR	0,04	1,00
rs2423000	rs2423000	20	4774685	PRNP	flanking_5UTR	0,04	1,00
rs723561	rs723561	20	4777740	PRNP	flanking_5UTR	0,04	1,00
rs2281639	rs2281639	20	4778754	PRNP	flanking_5UTR	0,04	1,00
rs6084895	rs6084895	20	4780947	PRNP	flanking_5UTR	0,04	1,00
rs1535382	rs1535382	20	4781198	PRNP	flanking_5UTR	0,04	1,00
rs6139557	rs6139557	20	4782100	PRNP	flanking_5UTR	0,04	1,00
rs2423011	rs2423011	20	4785315	PRNP	flanking_5UTR	0,04	1,00
rs6084900	rs6084900	20	4788130	PRNP	flanking_5UTR	0,04	1,00
rs2065009	rs2065009	20	4789930	PRNP	flanking_5UTR	0,04	1,00
rs1885303	rs1885303	20	4794243	PRNP	flanking_5UTR	0,04	1,00
rs2423037	rs2423037	20	4794989	PRNP	flanking_5UTR	0,04	1,00
rs2423045	rs2423045	20	4799322	PRNP	flanking_5UTR	0,04	1,00
rs2295782	rs2295782	20	4805281	PRNP	flanking_5UTR	0,04	1,00
rs2423064	rs2423064	20	4813678	PRNP	flanking_5UTR	0,04	1,00
rs2423067	rs2423067	20	4817968	PRNP	flanking_5UTR	0,04	1,00
rs4815747	rs4815747	20	4821622	PRNP	flanking_5UTR	0,04	1,00
rs6084910	rs6084910	20	4826400	PRNP	flanking_5UTR	0,04	1,00
rs6037988	rs6037988	20	4830412	PRNP	flanking_5UTR	0,04	1,00
rs1131382	rs1131382	20	4834338	PRNP	flanking_5UTR	0,04	1,00
rs16990309	rs16990309	20	4836440	PRNP	flanking_5UTR	0,04	1,00
rs6107541	rs6107541	20	4840270	PRNP	flanking_5UTR	0,04	1,00
rs6116558	rs6116558	20	4845554	PRNP	flanking_5UTR	0,04	1,00
rs12329577	rs12329577	20	4847010	PRNP	flanking_5UTR	0,04	1,00
rs1110277	rs1110277	20	4854682	PRNP	flanking_5UTR	0,04	1,00
rs8115867	rs8115867	20	4855678	PRNP	flanking_5UTR	0,04	1,00
rs6107546	rs6107546	20	4856744	PRNP	flanking_5UTR	0,04	1,00
rs6038010	rs6038010	20	4863786	PRNP	flanking_5UTR	0,04	1,00
rs1629176	rs1629176	20	4869790	PRNP	flanking_5UTR	0,04	1,00
rs1715378	rs1715378	20	4879837	PRNP	intron	0,04	1,00
rs1776964	rs1776964	20	4880308	PRNP	intron	0,04	1,00
rs1715385	rs1715385	20	4887670	PRNP	flanking_3UTR	0,04	1,00
rs1776967	rs1776967	20	4891536	PRNP	flanking_3UTR	0,04	1,00
rs6133175	rs6133175	20	4891759	PRND	flanking_5UTR	0,04	1,00
rs1614554	rs1614554	20	4894220	PRND	flanking_5UTR	0,04	1,00
rs1715364	rs1715364	20	4898896	PRND	coding	0,04	1,00
rs3914810	rs3914810	20	4927713	PRND	flanking_3UTR	0,04	1,00
rs2748901	rs2748901	20	4948248	PRNT	intron	0,04	1,00
rs6139593	rs6139593	20	4952923	PRNT	intron	0,04	1,00
rs2064842	rs2064842	20	4970721	PRNT	flanking_5UTR	0,04	1,00
rs4815759	rs4815759	20	4979886	PRNT	flanking_5UTR	0,04	1,00
rs8126456	rs8126456	20	4998974	PRNT	flanking_5UTR	0,04	1,00
rs6053046	rs6053046	20	5014479	RASSF2	flanking_3UTR	0,04	1,00
rs373542	rs373542	20	5020237	RASSF2	flanking_3UTR	0,04	1,00
rs404678	rs404678	20	5024237	RASSF2	flanking_3UTR	0,04	1,00
rs261360	rs261360	20	5037774	RASSF2	flanking_3UTR	0,04	1,00
rs4815763	rs4815763	20	5046930	RASSF2	flanking_3UTR	0,04	1,00
rs374995	rs374995	20	5053808	RASSF2	flanking_3UTR	0,04	1,00
rs11908536	rs11908536	20	5058969	RASSF2	flanking_3UTR	0,04	1,00
rs735204	rs735204	20	5075777	RASSF2	3UTR	0,04	1,00
rs11549113	rs11549113	20	5081477	RASSF2	intron	0,04	1,00
rs11549109	rs11549109	20	5081499	RASSF2	intron	0,04	1,00
rs11549112	rs11549112	20	5081524	RASSF2	intron	0,04	1,00
rs6053111	rs6053111	20	5081937	RASSF2	intron	0,04	1,00
rs17349	rs17349	20	5099516	RASSF2	intron	0,04	1,00
rs4239761	rs4239761	20	5114584	RASSF2	intron	0,04	1,00
rs6107581	rs6107581	20	5115036	RASSF2	intron	0,04	1,00
rs2423089	rs2423089	20	5116199	RASSF2	flanking_5UTR	0,04	1,00
rs1292197	rs1292197	20	5137905	RASSF2	flanking_5UTR	0,04	1,00
rs1470351	rs1470351	20	5149713	LOC643305	flanking_5UTR	0,04	1,00
rs6107589	rs6107589	20	5150051	LOC643305	flanking_5UTR	0,04	1,00
rs10485483	rs10485483	20	5158354	LOC643305	flanking_3UTR	0,04	1,00
rs6038092	rs6038092	20	5189472	RASSF2	flanking_3UTR	0,04	1,00
rs1028549	rs1028549	20	5198287	LOC643305	flanking_3UTR	0,04	1,00
rs1002929	rs1002929	20	5209217	LOC728286	intron	0,04	1,00
rs6076792	rs6076792	20	5223014	LOC728286	flanking_3UTR	0,04	1,00
rs6076798	rs6076798	20	5234887	LOC728286	flanking_3UTR	0,04	1,00
rs2875986	rs2875986	20	5240592	SLC23A2	flanking_3UTR	0,04	1,00
rs6053233	rs6053233	20	5242559	SLC23A2	flanking_3UTR	0,04	1,00
rs6085054	rs6085054	20	5245152	SLC23A2	flanking_3UTR	0,04	1,00
rs17777279	rs17777279	20	5246614	SLC23A2	3UTR	0,04	1,00
rs728237	rs728237	20	5248293	SLC23A2	3UTR	0,04	1,00
rs2038410	rs2038410	20	5249302	SLC23A2	intron	0,04	1,00
rs910970	rs910970	20	5271710	SLC23A2	intron	0,04	1,00
rs6085075	rs6085075	20	5271836	SLC23A2	intron	0,04	1,00
rs6038123	rs6038123	20	5272152	SLC23A2	coding	0,04	1,00
rs10485484	rs10485484	20	5278869	SLC23A2	intron	0,04	1,00
rs6053268	rs6053268	20	5278993	SLC23A2	intron	0,04	1,00
rs10485485	rs10485485	20	5284380	SLC23A2	intron	0,04	1,00
rs6053281	rs6053281	20	5289644	SLC23A2	intron	0,04	1,00
rs6516015	rs6516015	20	5292086	SLC23A2	intron	0,04	1,00
rs910973	rs910973	20	5296651	SLC23A2	coding	0,04	1,00
rs4281978	rs4281978	20	5297984	SLC23A2	intron	0,04	1,00
rs6085093	rs6085093	20	5302653	SLC23A2	intron	0,04	1,00
rs6107614	rs6107614	20	5308321	SLC23A2	intron	0,04	1,00
rs6038138	rs6038138	20	5316523	SLC23A2	intron	0,04	1,00
rs6085113	rs6085113	20	5318202	SLC23A2	intron	0,04	1,00
rs6116759	rs6116759	20	5334440	SLC23A2	intron	0,04	1,00
rs4815797	rs4815797	20	5338636	SLC23A2	intron	0,04	1,00
rs4815800	rs4815800	20	5339502	SLC23A2	intron	0,04	1,00
rs6038151	rs6038151	20	5348790	SLC23A2	intron	0,04	1,00
rs6085135	rs6085135	20	5357187	SLC23A2	intron	0,04	1,00
rs6053352	rs6053352	20	5357902	SLC23A2	flanking_5UTR	0,04	1,00
rs6053355	rs6053355	20	5359699	SLC23A2	flanking_5UTR	0,04	1,00
rs6076827	rs6076827	20	5374252	SLC23A2	flanking_5UTR	0,04	1,00
rs2145097	rs2145097	20	5377511	SLC23A2	flanking_5UTR	0,04	1,00
rs10485486	rs10485486	20	5378152	C20orf30	flanking_3UTR	0,04	1,00
rs10485487	rs10485487	20	5378864	C20orf30	flanking_3UTR	0,04	1,00
rs6085144	rs6085144	20	5379651	C20orf30	flanking_3UTR	0,04	1,00
rs6053371	rs6053371	20	5386982	C20orf30	flanking_3UTR	0,04	1,00
rs6053374	rs6053374	20	5387789	C20orf30	flanking_3UTR	0,04	1,00
rs6085154	rs6085154	20	5393153	C20orf30	coding	0,04	1,00
rs1884751	rs1884751	20	5397328	C20orf30	coding	0,04	1,00
rs6076832	rs6076832	20	5404034	C20orf30	coding	0,04	1,00
rs6053384	rs6053384	20	5406093	C20orf30	intron	0,04	1,00
rs2295516	rs2295516	20	5413169	PCNA	intron	0,04	1,00
rs574755	rs574755	20	5425342	CDS2	intron	0,04	1,00
rs10485490	rs10485490	20	5428494	CDS2	intron	0,04	1,00
rs10485492	rs10485492	20	5428989	CDS2	intron	0,04	1,00
rs2295514	rs2295514	20	5451915	CDS2	intron	0,04	1,00
cnvi0010450	cnvi0010450	20	5452321	CDS2	intron	0,04	1,00
rs6139737	rs6139737	20	5453856	CDS2	intron	0,04	1,00
rs8119580	rs8119580	20	5456109	CDS2	intron	0,04	1,00
rs2022259	rs2022259	20	5464732	CDS2	flanking_3UTR	0,04	1,00
rs6038180	rs6038180	20	5465449	CDS2	flanking_3UTR	0,04	1,00
rs910700	rs910700	20	5466940	CDS2	flanking_3UTR	0,04	1,00
rs910702	rs910702	20	5467063	CDS2	flanking_3UTR	0,04	1,00
rs6116807	rs6116807	20	5474423	PROKR2	flanking_3UTR	0,04	1,00
rs3747908	rs3747908	20	5477335	PROKR2	flanking_3UTR	0,04	1,00
rs2423095	rs2423095	20	5478505	PROKR2	flanking_3UTR	0,04	1,00
rs8114746	rs8114746	20	5481680	PROKR2	flanking_3UTR	0,04	1,00
rs7264030	rs7264030	20	5485097	PROKR2	flanking_3UTR	0,04	1,00
rs7269032	rs7269032	20	5490828	PROKR2	flanking_3UTR	0,04	1,00
rs6133219	rs6133219	20	5495069	PROKR2	flanking_3UTR	0,04	1,00
rs6053458	rs6053458	20	5510185	PROKR2	flanking_3UTR	0,04	1,00
rs2295370	rs2295370	20	5515856	PROKR2	flanking_3UTR	0,04	1,00
rs6107648	rs6107648	20	5524247	PROKR2	flanking_3UTR	0,04	1,00
rs6107650	rs6107650	20	5526113	PROKR2	flanking_3UTR	0,04	1,00
rs8657	rs8657	20	5527176	PROKR2	flanking_3UTR	0,04	1,00
rs15291	rs15291	20	5527230	PROKR2	intron	0,04	1,00
rs6053479	rs6053479	20	5527763	PROKR2	intron	0,04	1,00
rs7263137	rs7263137	20	5532853	PROKR2	intron	0,04	1,00
rs2273372	rs2273372	20	5542092	FLJ33544	coding	0,04	1,00
rs6107653	rs6107653	20	5542471	FLJ33544	3UTR	0,04	1,00
rs6139762	rs6139762	20	5546694	FLJ33544	flanking_3UTR	0,04	1,00
rs6133228	rs6133228	20	5552076	FLJ33544	flanking_3UTR	0,04	1,00
rs2295372	rs2295372	20	5554808	FLJ33544	flanking_3UTR	0,04	1,00
rs6038207	rs6038207	20	5557481	FLJ33544	flanking_3UTR	0,04	1,00
rs238298	rs238298	20	5587002	FLJ33544	flanking_3UTR	0,04	1,00
rs238288	rs238288	20	5591903	FLJ33544	flanking_3UTR	0,04	1,00
rs6038219	rs6038219	20	5610737	FLJ33544	flanking_3UTR	0,04	1,00
rs6139791	rs6139791	20	5631288	FLJ33544	flanking_3UTR	0,04	1,00
rs6053572	rs6053572	20	5633512	FLJ33544	flanking_3UTR	0,04	1,00
rs2423124	rs2423124	20	5636945	FLJ33544	flanking_3UTR	0,04	1,00
rs13044797	rs13044797	20	5641273	FLJ33544	flanking_3UTR	0,04	1,00
rs8119133	rs8119133	20	5644184	FLJ33544	flanking_3UTR	0,04	1,00
rs805751	rs805751	20	5647738	FLJ33544	flanking_3UTR	0,04	1,00
rs732007	rs732007	20	5650318	FLJ33544	flanking_3UTR	0,04	1,00
rs6133248	rs6133248	20	5655073	FLJ33544	flanking_3UTR	0,04	1,00
rs6053604	rs6053604	20	5664999	FLJ33544	flanking_3UTR	0,04	1,00
rs805770	rs805770	20	5668714	FLJ33544	flanking_3UTR	0,04	1,00
rs805764	rs805764	20	5676783	FLJ33544	flanking_3UTR	0,04	1,00
rs805763	rs805763	20	5676881	FLJ33544	flanking_3UTR	0,04	1,00
rs805746	rs805746	20	5684462	LOC728329	flanking_3UTR	0,04	1,00
rs805745	rs805745	20	5685929	LOC728329	flanking_3UTR	0,04	1,00
rs805744	rs805744	20	5687810	LOC728329	flanking_3UTR	0,04	1,00
rs4815849	rs4815849	20	5690278	LOC728329	flanking_3UTR	0,04	1,00
rs805743	rs805743	20	5690409	LOC728329	flanking_3UTR	0,04	1,00
rs6139808	rs6139808	20	5693718	LOC728329	flanking_3UTR	0,04	1,00
rs6085252	rs6085252	20	5695053	LOC728329	flanking_3UTR	0,04	1,00
rs805732	rs805732	20	5699559	LOC728329	flanking_3UTR	0,04	1,00
rs1546478	rs1546478	20	5701481	KIAA1434	flanking_3UTR	0,04	1,00
rs6085256	rs6085256	20	5707548	LOC728329	flanking_3UTR	0,04	1,00
rs906935	rs906935	20	5710065	LOC728329	flanking_3UTR	0,04	1,00
rs6053640	rs6053640	20	5715193	LOC728329	flanking_3UTR	0,04	1,00
rs2326660	rs2326660	20	5726401	LOC728329	flanking_3UTR	0,04	1,00
rs6116934	rs6116934	20	5731803	LOC728329	flanking_3UTR	0,04	1,00
rs6107683	rs6107683	20	5731955	LOC728329	flanking_3UTR	0,04	1,00
rs6133262	rs6133262	20	5761024	LOC728329	flanking_3UTR	0,04	1,00
rs6139831	rs6139831	20	5770919	LOC728329	intron	0,04	1,00
rs6139832	rs6139832	20	5770997	LOC728329	flanking_5UTR	0,04	1,00
rs4813777	rs4813777	20	5775251	RP5-1022P6.2	flanking_3UTR	0,04	1,00
rs505528	rs505528	20	5778905	RP5-1022P6.2	flanking_3UTR	0,04	1,00
rs17286495	rs17286495	20	5782350	RP5-1022P6.2	flanking_3UTR	0,04	1,00
rs1555141	rs1555141	20	5782559	RP5-1022P6.2	flanking_3UTR	0,04	1,00
rs966534	rs966534	20	5787785	RP5-1022P6.2	flanking_3UTR	0,04	1,00
rs1151950	rs1151950	20	5801710	RP5-1022P6.2	flanking_3UTR	0,04	1,00
rs6133268	rs6133268	20	5809016	RP5-1022P6.2	3UTR	0,04	1,00
rs237084	rs237084	20	5813582	RP5-1022P6.2	intron	0,04	1,00
rs237097	rs237097	20	5819545	RP5-1022P6.2	intron	0,04	1,00
rs1632590	rs1632590	20	5842094	RP5-1022P6.2	intron	0,04	1,00
rs6053754	rs6053754	20	5842518	RP5-1022P6.2	intron	0,04	1,00
rs6085297	rs6085297	20	5843479	RP5-1022P6.2	intron	0,04	1,00
rs1699233	rs1699233	20	5843812	RP5-1022P6.2	intron	0,04	1,00
rs1699230	rs1699230	20	5845855	RP5-1022P6.2	intron	0,04	1,00
rs1777356	rs1777356	20	5846123	RP5-1022P6.2	intron	0,04	1,00
rs1777361	rs1777361	20	5851520	RP5-1022P6.2	flanking_5UTR	0,04	1,00
rs4471957	rs4471957	20	5855847	RP5-1022P6.2	flanking_5UTR	0,04	1,00
rs6038317	rs6038317	20	5865636	RP5-1022P6.2	flanking_5UTR	0,04	1,00
rs6139863	rs6139863	20	5867466	RP5-1022P6.2	flanking_5UTR	0,04	1,00
rs7362501	rs7362501	20	5874493	RP5-1022P6.2	flanking_5UTR	0,04	1,00
rs1287076	rs1287076	20	5874793	RP5-1022P6.2	flanking_5UTR	0,04	1,00
rs6085315	rs6085315	20	5876691	RP5-1022P6.2	flanking_5UTR	0,04	1,00
rs988036	rs988036	20	5882236	RP5-1022P6.2	flanking_5UTR	0,04	1,00
rs2326701	rs2326701	20	5886749	RP5-1022P6.2	flanking_5UTR	0,04	1,00
rs1287031	rs1287031	20	5887146	RP5-1022P6.2	flanking_5UTR	0,04	1,00
rs236143	rs236143	20	5896293	C20orf196	flanking_5UTR	0,04	1,00
rs387700	rs387700	20	5899922	C20orf196	flanking_5UTR	0,04	1,00
rs910122	rs910122	20	5903323	C20orf196	flanking_5UTR	0,04	1,00
rs881118	rs881118	20	5903388	C20orf196	flanking_5UTR	0,04	1,00
rs236151	rs236151	20	5903517	C20orf196	flanking_5UTR	0,04	1,00
rs742710	rs742710	20	5904028	C20orf196	flanking_5UTR	0,04	1,00
rs742711	rs742711	20	5904040	C20orf196	flanking_5UTR	0,04	1,00
rs2821	rs2821	20	5905779	C20orf196	flanking_5UTR	0,04	1,00
rs400735	rs400735	20	5909565	C20orf196	flanking_5UTR	0,04	1,00
rs381571	rs381571	20	5914424	C20orf196	flanking_5UTR	0,04	1,00
rs16991515	rs16991515	20	5915922	C20orf196	flanking_5UTR	0,04	1,00
rs183535	rs183535	20	5918288	C20orf196	flanking_5UTR	0,04	1,00
rs236184	rs236184	20	5928245	C20orf196	flanking_5UTR	0,04	1,00
rs236110	rs236110	20	5933108	C20orf196	flanking_5UTR	0,04	1,00
rs236113	rs236113	20	5934566	C20orf196	flanking_5UTR	0,04	1,00
rs236114	rs236114	20	5935385	C20orf196	flanking_5UTR	0,04	1,00
rs3761873	rs3761873	20	5939214	C20orf196	flanking_5UTR	0,04	1,00
rs4815879	rs4815879	20	5949534	C20orf196	intron	0,04	1,00
rs236106	rs236106	20	5960691	C20orf196	intron	0,04	1,00
rs6139887	rs6139887	20	5986234	C20orf196	intron	0,04	1,00
rs6085344	rs6085344	20	5988675	C20orf196	intron	0,04	1,00
rs6133280	rs6133280	20	5994488	C20orf196	coding	0,04	1,00
rs8123221	rs8123221	20	5996887	C20orf196	intron	0,04	1,00
rs6085352	rs6085352	20	6004157	C20orf196	intron	0,04	1,00
rs6038332	rs6038332	20	6013499	C20orf196	intron	0,04	1,00
rs6139898	rs6139898	20	6014954	C20orf196	intron	0,04	1,00
rs6117041	rs6117041	20	6015940	C20orf196	intron	0,04	1,00
cnvi0010452	cnvi0010452	20	6027548	C20orf196	intron	0,04	1,00
rs1884644	rs1884644	20	6029634	C20orf196	intron	0,04	1,00
rs1884642	rs1884642	20	6034532	C20orf196	intron	0,04	1,00
rs2326679	rs2326679	20	6035228	C20orf196	intron	0,04	1,00
rs1884641	rs1884641	20	6039909	C20orf196	intron	0,04	1,00
rs4441549	rs4441549	20	6042852	C20orf196	intron	0,04	1,00
rs6117065	rs6117065	20	6055038	C20orf196	intron	0,04	1,00
rs1059391	rs1059391	20	6056356	C20orf196	intron	0,04	1,00
rs6053878	rs6053878	20	6056918	C20orf196	intron	0,04	1,00
rs2232081	rs2232081	20	6060395	C20orf196	coding	0,04	1,00
rs6053889	rs6053889	20	6062913	C20orf196	flanking_3UTR	0,04	1,00
rs6117071	rs6117071	20	6062988	C20orf196	flanking_3UTR	0,04	1,00
rs2232080	rs2232080	20	6064606	C20orf196	flanking_3UTR	0,04	1,00
rs749922	rs749922	20	6068863	C20orf196	flanking_3UTR	0,04	1,00
rs11700048	rs11700048	20	6085006	C20orf196	flanking_3UTR	0,04	1,00
rs6053908	rs6053908	20	6086772	C20orf196	flanking_3UTR	0,04	1,00
rs6516102	rs6516102	20	6086938	CHGB	flanking_5UTR	0,04	1,00
rs2326719	rs2326719	20	6093090	CHGB	flanking_5UTR	0,04	1,00
rs2295435	rs2295435	20	6096695	CHGB	flanking_5UTR	0,04	1,00
rs6038366	rs6038366	20	6111569	CHGB	flanking_5UTR	0,04	1,00
rs6053929	rs6053929	20	6115581	CHGB	flanking_5UTR	0,04	1,00
rs2144936	rs2144936	20	6118980	CHGB	flanking_5UTR	0,04	1,00
rs11087720	rs11087720	20	6126302	CHGB	intron	0,04	1,00
rs947465	rs947465	20	6128201	CHGB	intron	0,04	1,00
rs1774886	rs1774886	20	6128223	CHGB	coding	0,04	1,00
rs3897510	rs3897510	20	6129268	CHGB	coding	0,04	1,00
rs3897509	rs3897509	20	6130025	CHGB	coding	0,04	1,00
rs6076954	rs6076954	20	6137310	CHGB	coding	0,04	1,00
rs3844457	rs3844457	20	6143379	CHGB	coding	0,04	1,00
rs3852936	rs3852936	20	6144454	CHGB	3UTR	0,04	1,00
rs7270088	rs7270088	20	6156745	CHGB	flanking_3UTR	0,04	1,00
rs6085425	rs6085425	20	6162015	TRMT6	flanking_3UTR	0,04	1,00
rs6133296	rs6133296	20	6166488	TRMT6	flanking_3UTR	0,04	1,00
rs6085432	rs6085432	20	6180089	TRMT6	flanking_3UTR	0,04	1,00
rs11907023	rs11907023	20	6180628	TRMT6	intron	0,04	1,00
rs3747920	rs3747920	20	6181867	MCM8	coding	0,04	1,00
rs2021349	rs2021349	20	6181948	MCM8	intron	0,04	1,00
rs6053977	rs6053977	20	6187441	MCM8	intron	0,04	1,00
rs8121939	rs8121939	20	6214234	MCM8	coding	0,04	1,00
rs6038397	rs6038397	20	6238141	MCM8	intron	0,04	1,00
rs7354540	rs7354540	20	6243193	MCM8	intron	0,04	1,00
rs3909086	rs3909086	20	6251639	CRLS1	flanking_5UTR	0,04	1,00
rs2326734	rs2326734	20	6274464	CRLS1	intron	0,04	1,00
rs237686	rs237686	20	6277097	CRLS1	intron	0,04	1,00
rs237694	rs237694	20	6286656	CRLS1	intron	0,04	1,00
rs2326748	rs2326748	20	6293824	CRLS1	intron	0,04	1,00
rs6139963	rs6139963	20	6295914	CRLS1	intron	0,04	1,00
cnvi0010453	cnvi0010453	20	6307815	CRLS1	intron	0,04	1,00
cnvi0010454	cnvi0010454	20	6308035	CRLS1	intron	0,04	1,00
rs1571216	rs1571216	20	6316328	C20orf75	intron	0,04	1,00
rs6139969	rs6139969	20	6322657	C20orf75	intron	0,04	1,00
rs6076983	rs6076983	20	6331376	C20orf75	intron	0,04	1,00
rs3920632	rs3920632	20	6336597	C20orf75	intron	0,04	1,00
rs6054169	rs6054169	20	6350001	C20orf75	5UTR	0,04	1,00
rs6054170	rs6054170	20	6350132	C20orf75	flanking_5UTR	0,04	1,00
rs6054171	rs6054171	20	6350178	C20orf75	flanking_5UTR	0,04	1,00
rs2148815	rs2148815	20	6363480	C20orf75	flanking_5UTR	0,04	1,00
rs2182712	rs2182712	20	6368089	FERMT1	flanking_3UTR	0,04	1,00
rs2209761	rs2209761	20	6371011	FERMT1	3UTR	0,04	1,00
rs355527	rs355527	20	6388068	FERMT1	3UTR	0,04	1,00
rs6139980	rs6139980	20	6407642	FERMT1	intron	0,04	1,00
rs6139981	rs6139981	20	6411203	FERMT1	intron	0,04	1,00
rs6117260	rs6117260	20	6422697	FERMT1	intron	0,04	1,00
rs4815900	rs4815900	20	6428764	FERMT1	intron	0,04	1,00
rs953959	rs953959	20	6431316	FERMT1	intron	0,04	1,00
rs2225348	rs2225348	20	6434266	FERMT1	intron	0,04	1,00
rs6140000	rs6140000	20	6435839	FERMT1	intron	0,04	1,00
rs6077004	rs6077004	20	6442961	FERMT1	intron	0,04	1,00
rs7269050	rs7269050	20	6444931	FERMT1	intron	0,04	1,00
rs6085568	rs6085568	20	6452982	FERMT1	intron	0,04	1,00
rs6054292	rs6054292	20	6454661	FERMT1	flanking_5UTR	0,04	1,00
rs6140007	rs6140007	20	6455198	FERMT1	flanking_5UTR	0,04	1,00
rs979548	rs979548	20	6457336	FERMT1	flanking_5UTR	0,04	1,00
rs6054298	rs6054298	20	6459623	FERMT1	flanking_5UTR	0,04	1,00
rs6117286	rs6117286	20	6459715	FERMT1	flanking_5UTR	0,04	1,00
rs6054299	rs6054299	20	6459787	FERMT1	flanking_5UTR	0,04	1,00
rs10485705	rs10485705	20	6468261	FERMT1	flanking_5UTR	0,04	1,00
rs1970008	rs1970008	20	6468371	FERMT1	flanking_5UTR	0,04	1,00
rs6117294	rs6117294	20	6470805	FERMT1	flanking_5UTR	0,04	1,00
rs6140010	rs6140010	20	6473123	LOC643503	flanking_3UTR	0,04	1,00
rs4815908	rs4815908	20	6478585	LOC643503	flanking_3UTR	0,04	1,00
rs6117303	rs6117303	20	6487687	LOC643503	flanking_3UTR	0,04	1,00
rs6085588	rs6085588	20	6500296	LOC643503	flanking_3UTR	0,04	1,00
rs2423161	rs2423161	20	6509880	LOC643503	flanking_3UTR	0,04	1,00
rs2423163	rs2423163	20	6513935	LOC643503	flanking_3UTR	0,04	1,00
rs6117325	rs6117325	20	6519677	LOC643503	flanking_3UTR	0,04	1,00
rs1321440	rs1321440	20	6538532	LOC643503	3UTR	0,04	1,00
rs2104012	rs2104012	20	6551421	LOC643503	3UTR	0,04	1,00
rs6117342	rs6117342	20	6560776	LOC643503	flanking_5UTR	0,04	1,00
rs2145274	rs2145274	20	6572014	LOC643503	flanking_5UTR	0,04	1,00
rs6038556	rs6038556	20	6591010	LOC643503	flanking_5UTR	0,04	1,00
rs4813800	rs4813800	20	6595646	LOC643503	flanking_5UTR	0,04	1,00
rs2064857	rs2064857	20	6596582	LOC643503	flanking_5UTR	0,04	1,00
rs1884897	rs1884897	20	6612832	LOC643503	flanking_5UTR	0,04	1,00
rs967417	rs967417	20	6620893	LOC643503	flanking_5UTR	0,04	1,00
rs984677	rs984677	20	6637234	LOC643503	flanking_5UTR	0,04	1,00
rs6054434	rs6054434	20	6643207	LOC643503	flanking_5UTR	0,04	1,00
rs4815922	rs4815922	20	6648127	LOC643503	flanking_5UTR	0,04	1,00
rs13037957	rs13037957	20	6649874	FERMT1	flanking_5UTR	0,04	1,00
rs6077047	rs6077047	20	6655780	FERMT1	flanking_5UTR	0,04	1,00
rs2143712	rs2143712	20	6663715	LOC643503	flanking_5UTR	0,04	1,00
rs2206920	rs2206920	20	6668179	LOC643503	flanking_5UTR	0,04	1,00
rs6054459	rs6054459	20	6670381	LOC643503	flanking_5UTR	0,04	1,00
rs6038585	rs6038585	20	6671980	LOC643503	flanking_5UTR	0,04	1,00
rs6107864	rs6107864	20	6672117	LOC643503	flanking_5UTR	0,04	1,00
rs6054474	rs6054474	20	6676723	LOC643503	flanking_5UTR	0,04	1,00
rs2038212	rs2038212	20	6681459	LOC643503	flanking_5UTR	0,04	1,00
rs6085659	rs6085659	20	6686426	LOC643503	flanking_5UTR	0,04	1,00
rs6085660	rs6085660	20	6691069	LOC643503	flanking_5UTR	0,04	1,00
rs4813802	rs4813802	20	6699595	LOC643503	flanking_5UTR	0,04	1,00
rs6054494	rs6054494	20	6710434	LOC643503	flanking_5UTR	0,04	1,00
rs235713	rs235713	20	6711863	LOC643503	flanking_5UTR	0,04	1,00
rs1500545	rs1500545	20	6714108	LOC643503	flanking_5UTR	0,04	1,00
rs6054501	rs6054501	20	6718939	LOC643503	flanking_5UTR	0,04	1,00
rs235721	rs235721	20	6728238	LOC643503	flanking_5UTR	0,04	1,00
rs6117415	rs6117415	20	6729789	LOC643503	flanking_5UTR	0,04	1,00
rs235710	rs235710	20	6740366	LOC643503	flanking_5UTR	0,04	1,00
rs1980499	rs1980499	20	6746498	LOC643503	flanking_5UTR	0,04	1,00
rs1005464	rs1005464	20	6756148	LOC728383	flanking_5UTR	0,04	1,00
rs235772	rs235772	20	6762719	LOC728383	flanking_5UTR	0,04	1,00
rs173107	rs173107	20	6765841	LOC728383	flanking_5UTR	0,04	1,00
rs235757	rs235757	20	6766019	LOC728383	flanking_5UTR	0,04	1,00
rs235753	rs235753	20	6769533	LOC728383	flanking_5UTR	0,04	1,00
rs235704	rs235704	20	6772263	LOC728383	flanking_5UTR	0,04	1,00
rs2650972	rs2650972	20	6783274	LOC728383	flanking_5UTR	0,04	1,00
rs235716	rs235716	20	6787507	LOC728383	flanking_5UTR	0,04	1,00
rs235725	rs235725	20	6792145	LOC728383	flanking_5UTR	0,04	1,00
rs996544	rs996544	20	6796219	LOC728383	flanking_5UTR	0,04	1,00
rs6054529	rs6054529	20	6798495	LOC728383	flanking_5UTR	0,04	1,00
rs6054534	rs6054534	20	6799833	LOC728383	flanking_5UTR	0,04	1,00
rs2224191	rs2224191	20	6807276	LOC728383	flanking_5UTR	0,04	1,00
rs372398	rs372398	20	6810998	LOC728383	flanking_5UTR	0,04	1,00
rs6054538	rs6054538	20	6813845	LOC728383	flanking_5UTR	0,04	1,00
rs6054545	rs6054545	20	6824496	LOC728383	flanking_5UTR	0,04	1,00
rs6038619	rs6038619	20	6826062	LOC728383	flanking_5UTR	0,04	1,00
rs723511	rs723511	20	6838358	LOC728383	flanking_5UTR	0,04	1,00
rs4813807	rs4813807	20	6854187	LOC728383	flanking_5UTR	0,04	1,00
rs1883719	rs1883719	20	6862289	LOC728383	flanking_5UTR	0,04	1,00
rs6107891	rs6107891	20	6881898	LOC728383	flanking_5UTR	0,04	1,00
rs6038639	rs6038639	20	6886744	LOC728383	flanking_5UTR	0,04	1,00
rs6038647	rs6038647	20	6898806	LOC728383	flanking_5UTR	0,04	1,00
rs6140124	rs6140124	20	6914617	LOC728383	flanking_5UTR	0,04	1,00
rs6077102	rs6077102	20	6924681	LOC728383	flanking_5UTR	0,04	1,00
rs10485708	rs10485708	20	6926675	LOC728383	flanking_5UTR	0,04	1,00
rs6038661	rs6038661	20	6927369	LOC728383	flanking_5UTR	0,04	1,00
rs7263691	rs7263691	20	6930578	LOC728383	flanking_5UTR	0,04	1,00
rs4815952	rs4815952	20	6934897	LOC728383	flanking_5UTR	0,04	1,00
rs6085775	rs6085775	20	6939579	LOC728383	flanking_5UTR	0,04	1,00
rs6077113	rs6077113	20	6940680	LOC728383	flanking_5UTR	0,04	1,00
rs6054631	rs6054631	20	6942420	LOC728383	flanking_5UTR	0,04	1,00
rs6085781	rs6085781	20	6948587	LOC728383	flanking_5UTR	0,04	1,00
rs6077115	rs6077115	20	6952829	LOC728383	flanking_5UTR	0,04	1,00
rs6085802	rs6085802	20	6963240	LOC728383	flanking_5UTR	0,04	1,00
rs6107902	rs6107902	20	6969479	LOC728383	flanking_5UTR	0,04	1,00
rs6085817	rs6085817	20	6978096	LOC728383	flanking_5UTR	0,04	1,00
rs6085820	rs6085820	20	6980635	LOC728383	flanking_5UTR	0,04	1,00
rs2149639	rs2149639	20	6990833	LOC728383	flanking_5UTR	0,04	1,00
rs6133387	rs6133387	20	6994830	LOC728383	flanking_5UTR	0,04	1,00
rs6038686	rs6038686	20	6996371	LOC728383	flanking_5UTR	0,04	1,00
rs4616542	rs4616542	20	7006365	LOC728383	intron	0,04	1,00
rs4616543	rs4616543	20	7006604	LOC728383	intron	0,04	1,00
rs6117564	rs6117564	20	7011219	LOC728383	intron	0,04	1,00
rs2149642	rs2149642	20	7014445	LOC728383	intron	0,04	1,00
rs2183184	rs2183184	20	7014717	LOC728383	intron	0,04	1,00
rs756320	rs756320	20	7016232	LOC728383	intron	0,04	1,00
rs2026056	rs2026056	20	7029823	LOC728383	intron	0,04	1,00
rs6117583	rs6117583	20	7034547	LOC728383	intron	0,04	1,00
rs6054715	rs6054715	20	7057829	LOC728383	intron	0,04	1,00
rs232651	rs232651	20	7067037	LOC728383	intron	0,04	1,00
rs1005351	rs1005351	20	7072555	BMP2	intron	0,04	1,00
rs368007	rs368007	20	7085280	BMP2	flanking_3UTR	0,04	1,00
rs232657	rs232657	20	7094534	BMP2	flanking_3UTR	0,04	1,00
rs1884303	rs1884303	20	7106353	BMP2	flanking_3UTR	0,04	1,00
rs6117640	rs6117640	20	7108042	BMP2	flanking_3UTR	0,04	1,00
rs6054755	rs6054755	20	7112386	BMP2	flanking_3UTR	0,04	1,00
rs6107929	rs6107929	20	7121672	BMP2	flanking_3UTR	0,04	1,00
rs6038729	rs6038729	20	7137757	BMP2	flanking_3UTR	0,04	1,00
rs719563	rs719563	20	7142997	BMP2	flanking_3UTR	0,04	1,00
rs6117672	rs6117672	20	7172181	BMP2	flanking_3UTR	0,04	1,00
rs6077153	rs6077153	20	7179994	BMP2	flanking_3UTR	0,04	1,00
rs6054806	rs6054806	20	7191960	BMP2	flanking_3UTR	0,04	1,00
rs724940	rs724940	20	7199413	BMP2	flanking_3UTR	0,04	1,00
rs6054823	rs6054823	20	7202442	BMP2	flanking_3UTR	0,04	1,00
rs6140833	rs6140833	20	9012010	PLCB1	intron	0,04	1,00
rs6056355	rs6056355	20	9025897	PLCB1	intron	0,04	1,00
rs6056358	rs6056358	20	9029496	PLCB1	intron	0,04	1,00
rs6039365	rs6039365	20	9029741	PLCB1	intron	0,04	1,00
rs6108249	rs6108249	20	9035010	PLCB1	intron	0,04	1,00
rs927155	rs927155	20	9044145	PLCB1	coding	0,04	1,00
rs6077477	rs6077477	20	9044586	PLCB1	intron	0,04	1,00
rs6118469	rs6118469	20	9055820	PLCB1	intron	0,04	1,00
rs6039376	rs6039376	20	9060337	PLCB1	intron	0,04	1,00
rs8115948	rs8115948	20	9075391	PLCB1	intron	0,04	1,00
rs1155662	rs1155662	20	9077491	PLCB1	intron	0,04	1,00
rs6056405	rs6056405	20	9084927	PLCB1	intron	0,04	1,00
rs964310	rs964310	20	9098197	PLCB1	intron	0,04	1,00
rs6039393	rs6039393	20	9109893	PLCB1	intron	0,04	1,00
rs6108263	rs6108263	20	9111633	PLCB1	intron	0,04	1,00
rs12479503	rs12479503	20	9116997	PLCB1	intron	0,04	1,00
rs6118505	rs6118505	20	9123558	PLCB1	intron	0,04	1,00
rs6039399	rs6039399	20	9127494	PLCB1	intron	0,04	1,00
rs6086799	rs6086799	20	9155339	PLCB1	intron	0,04	1,00
rs1407101	rs1407101	20	9162109	PLCB1	3UTR	0,04	1,00
rs6056456	rs6056456	20	9168241	PLCB1	flanking_3UTR	0,04	1,00
rs6056460	rs6056460	20	9169242	PLCB1	flanking_3UTR	0,04	1,00
cnvi0010461	cnvi0010461	20	9169623	PLCB1	flanking_3UTR	0,04	1,00
cnvi0010462	cnvi0010462	20	9170083	PLCB1	flanking_3UTR	0,04	1,00
rs1321581	rs1321581	20	9171861	PLCB1	flanking_3UTR	0,04	1,00
rs2145266	rs2145266	20	9181662	PLCB1	flanking_3UTR	0,04	1,00
rs2224361	rs2224361	20	9224790	PLCB1	flanking_3UTR	0,04	1,00
rs6056500	rs6056500	20	9240838	PLCB1	flanking_3UTR	0,04	1,00
rs6056505	rs6056505	20	9243782	PLCB1	flanking_3UTR	0,04	1,00
rs2206138	rs2206138	20	9252390	PLCB1	flanking_3UTR	0,04	1,00
rs2223409	rs2223409	20	9267590	PLCB1	flanking_3UTR	0,04	1,00
rs6118560	rs6118560	20	9267692	PLCB1	flanking_3UTR	0,04	1,00
rs6077510	rs6077510	20	9288522	PLCB1	flanking_3UTR	0,04	1,00
rs6077511	rs6077511	20	9289325	PLCB4	flanking_5UTR	0,04	1,00
rs6056522	rs6056522	20	9292124	PLCB4	flanking_5UTR	0,04	1,00
rs2327164	rs2327164	20	9298889	PLCB4	flanking_5UTR	0,04	1,00
rs7272444	rs7272444	20	9303107	PLCB4	flanking_5UTR	0,04	1,00
rs8115510	rs8115510	20	9313941	PLCB4	flanking_5UTR	0,04	1,00
rs6039442	rs6039442	20	9317266	PLCB4	flanking_5UTR	0,04	1,00
rs7268671	rs7268671	20	9322989	PLCB4	flanking_5UTR	0,04	1,00
rs6039443	rs6039443	20	9326769	PLCB4	flanking_5UTR	0,04	1,00
rs6056570	rs6056570	20	9334776	PLCB1	flanking_3UTR	0,04	1,00
rs17481185	rs17481185	20	9346202	PLCB1	flanking_3UTR	0,04	1,00
rs725941	rs725941	20	9349033	PLCB4	flanking_5UTR	0,04	1,00
rs2299676	rs2299676	20	9357437	PLCB4	flanking_5UTR	0,04	1,00
rs6133703	rs6133703	20	9364577	PLCB4	flanking_5UTR	0,04	1,00
rs7265537	rs7265537	20	9368554	PLCB4	flanking_5UTR	0,04	1,00
rs1997696	rs1997696	20	9378671	PLCB4	flanking_5UTR	0,04	1,00
rs6133707	rs6133707	20	9379949	PLCB4	flanking_5UTR	0,04	1,00
rs6056595	rs6056595	20	9380556	PLCB4	flanking_5UTR	0,04	1,00
rs6118611	rs6118611	20	9414641	PLCB4	flanking_5UTR	0,04	1,00
rs6118618	rs6118618	20	9421183	PLCB4	flanking_5UTR	0,04	1,00
rs976649	rs976649	20	9429913	PLCB4	flanking_5UTR	0,04	1,00
rs2072954	rs2072954	20	9440840	PLCB4	flanking_5UTR	0,04	1,00
rs6086900	rs6086900	20	9463693	PLCB4	flanking_5UTR	0,04	1,00
rs6056647	rs6056647	20	9476953	PLCB4	flanking_5UTR	0,04	1,00
rs6077556	rs6077556	20	9483798	PLCB4	flanking_5UTR	0,04	1,00
rs6056654	rs6056654	20	9485967	PLCB4	flanking_5UTR	0,04	1,00
rs16995979	rs16995979	20	9486575	PLCB4	intron	0,04	1,00
rs16995983	rs16995983	20	9489944	PLCB4	intron	0,04	1,00
rs11905991	rs11905991	20	9491531	PLCB4	intron	0,04	1,00
rs4816144	rs4816144	20	9493480	PLCB4	intron	0,04	1,00
rs6056659	rs6056659	20	9493892	PLCB4	intron	0,04	1,00
rs4816145	rs4816145	20	9497388	PLCB4	intron	0,04	1,00
rs8117167	rs8117167	20	9497698	PLCB4	intron	0,04	1,00
rs16996017	rs16996017	20	9501098	PLCB4	intron	0,04	1,00
rs6056665	rs6056665	20	9504468	PLCB4	intron	0,04	1,00
rs2327183	rs2327183	20	9506705	PLCB4	intron	0,04	1,00
rs2072952	rs2072952	20	9525601	PLCB4	intron	0,04	1,00
rs6039498	rs6039498	20	9532700	PLCB4	intron	0,04	1,00
rs6039502	rs6039502	20	9540838	PLCB4	intron	0,04	1,00
rs10485733	rs10485733	20	9544722	PLCB4	intron	0,04	1,00
rs2026339	rs2026339	20	9554125	PLCB4	intron	0,04	1,00
rs9967942	rs9967942	20	9555781	PLCB4	flanking_5UTR	0,04	1,00
rs6056712	rs6056712	20	9556908	PLCB4	flanking_5UTR	0,04	1,00
rs6077567	rs6077567	20	9569769	PLCB4	intron	0,04	1,00
rs6056725	rs6056725	20	9574063	PLCB4	intron	0,04	1,00
rs6056733	rs6056733	20	9576643	PLCB4	intron	0,04	1,00
rs6056740	rs6056740	20	9581876	PLCB4	intron	0,04	1,00
rs6140981	rs6140981	20	9585873	PLCB4	intron	0,04	1,00
rs928366	rs928366	20	9589196	PLCB4	intron	0,04	1,00
rs2225471	rs2225471	20	9589577	PLCB4	intron	0,04	1,00
rs6056755	rs6056755	20	9592617	PLCB4	intron	0,04	1,00
rs6039524	rs6039524	20	9592676	PLCB4	coding	0,04	1,00
rs7272361	rs7272361	20	9594881	PLCB4	intron	0,04	1,00
rs219861	rs219861	20	9597555	PLCB4	intron	0,04	1,00
rs219870	rs219870	20	9602875	PLCB4	intron	0,04	1,00
rs6039529	rs6039529	20	9608977	PLCB4	intron	0,04	1,00
rs6086964	rs6086964	20	9611551	PLCB4	intron	0,04	1,00
rs12624866	rs12624866	20	9616075	PLCB4	intron	0,04	1,00
rs6516479	rs6516479	20	9618761	PLCB4	intron	0,04	1,00
rs6056774	rs6056774	20	9624587	PLCB4	intron	0,04	1,00
rs10485734	rs10485734	20	9625787	PLCB4	intron	0,04	1,00
rs6086972	rs6086972	20	9627908	PLCB4	intron	0,04	1,00
rs6039533	rs6039533	20	9630908	PLCB4	intron	0,04	1,00
rs4816158	rs4816158	20	9632609	PLCB4	intron	0,04	1,00
rs6039536	rs6039536	20	9634410	PLCB4	intron	0,04	1,00
rs6133735	rs6133735	20	9646834	PLCB4	intron	0,04	1,00
rs2423401	rs2423401	20	9649074	PLCB4	intron	0,04	1,00
rs6118687	rs6118687	20	9649234	PLCB4	intron	0,04	1,00
rs2423412	rs2423412	20	9655984	PLCB4	intron	0,04	1,00
rs6077585	rs6077585	20	9665895	PLCB4	intron	0,04	1,00
rs2050104	rs2050104	20	9671084	PLCB4	intron	0,04	1,00
rs8184671	rs8184671	20	9671797	PLCB4	intron	0,04	1,00
rs6086987	rs6086987	20	9685155	PLCB4	intron	0,04	1,00
rs6056812	rs6056812	20	9685525	PLCB4	flanking_3UTR	0,04	1,00
rs6086989	rs6086989	20	9687004	PLCB4	flanking_3UTR	0,04	1,00
rs2423431	rs2423431	20	9690349	C20orf103	flanking_5UTR	0,04	1,00
rs2423438	rs2423438	20	9704943	C20orf103	flanking_5UTR	0,04	1,00
rs1033470	rs1033470	20	9725697	C20orf103	flanking_5UTR	0,04	1,00
rs2423462	rs2423462	20	9734770	C20orf103	flanking_5UTR	0,04	1,00
rs16996383	rs16996383	20	9738531	C20orf103	flanking_5UTR	0,04	1,00
rs1569625	rs1569625	20	9740441	C20orf103	flanking_5UTR	0,04	1,00
rs2423467	rs2423467	20	9741876	C20orf103	flanking_5UTR	0,04	1,00
rs926502	rs926502	20	9744973	C20orf103	intron	0,04	1,00
rs6141031	rs6141031	20	9749518	C20orf103	intron	0,04	1,00
rs6516498	rs6516498	20	9759414	C20orf103	intron	0,03	1,00
rs2223569	rs2223569	20	9764263	C20orf103	intron	0,03	1,00
rs994487	rs994487	20	9768982	C20orf103	intron	0,03	1,00
rs6141035	rs6141035	20	9772904	PAK7	intron	0,03	1,00
rs10485735	rs10485735	20	9773877	PAK7	intron	0,03	1,00
rs2206481	rs2206481	20	9775551	PAK7	intron	0,03	1,00
rs6087032	rs6087032	20	9799063	PAK7	intron	0,03	1,00
rs6118746	rs6118746	20	9801670	PAK7	intron	0,03	1,00
rs6516503	rs6516503	20	9804835	PAK7	intron	0,03	1,00
rs6056909	rs6056909	20	9807527	PAK7	intron	0,03	1,00
rs221015	rs221015	20	9814706	PAK7	intron	0,03	1,00
rs221013	rs221013	20	9815528	PAK7	intron	0,03	1,00
rs761226	rs761226	20	9821007	PAK7	intron	0,03	1,00
rs12479522	rs12479522	20	9836779	PAK7	intron	0,03	1,00
rs11697698	rs11697698	20	9844170	PAK7	intron	0,03	1,00
rs6056945	rs6056945	20	9844819	PAK7	intron	0,03	1,00
rs6118769	rs6118769	20	9848516	PAK7	intron	0,03	1,00
rs6056969	rs6056969	20	9865109	PAK7	intron	0,03	1,00
rs1999448	rs1999448	20	9870970	PAK7	intron	0,03	1,00
rs6087052	rs6087052	20	9879166	PAK7	intron	0,03	1,00
rs2327206	rs2327206	20	9881109	PAK7	intron	0,03	1,00
rs914596	rs914596	20	9885653	PAK7	intron	0,03	1,00
rs6057007	rs6057007	20	9889990	PAK7	intron	0,03	1,00
rs6108352	rs6108352	20	9893062	PAK7	intron	0,03	1,00
rs6057021	rs6057021	20	9899439	PAK7	intron	0,03	1,00
rs6087063	rs6087063	20	9907608	PAK7	intron	0,03	1,00
rs2210455	rs2210455	20	9919383	PAK7	intron	0,03	1,00
cnvi0010463	cnvi0010463	20	9920258	PAK7	intron	0,03	1,00
cnvi0010464	cnvi0010464	20	9920483	PAK7	intron	0,03	1,00
rs6039638	rs6039638	20	9920486	PAK7	intron	0,03	1,00
rs2327209	rs2327209	20	9925555	PAK7	intron	0,03	1,00
rs4813906	rs4813906	20	9935686	PAK7	intron	0,03	1,00
rs6118835	rs6118835	20	9944658	PAK7	intron	0,03	1,00
rs6057059	rs6057059	20	9954288	PAK7	intron	0,03	1,00
rs195786	rs195786	20	9967527	PAK7	intron	0,03	1,00
rs195794	rs195794	20	9969371	PAK7	intron	0,03	1,00
rs2064658	rs2064658	20	9975954	PAK7	intron	0,03	1,00
rs6057071	rs6057071	20	9982725	PAK7	intron	0,03	1,00
rs6039649	rs6039649	20	9983300	PAK7	intron	0,03	1,00
rs6087099	rs6087099	20	9986343	PAK7	intron	0,03	1,00
rs8123132	rs8123132	20	9987276	PAK7	intron	0,03	1,00
rs6118852	rs6118852	20	9987409	PAK7	intron	0,03	1,00
rs724675	rs724675	20	9990245	PAK7	intron	0,03	1,00
rs6057073	rs6057073	20	9991250	PAK7	intron	0,03	1,00
rs16996676	rs16996676	20	9992048	PAK7	intron	0,03	1,00
rs6133777	rs6133777	20	9995950	PAK7	intron	0,03	1,00
rs10485737	rs10485737	20	10004725	PAK7	intron	0,03	1,00
rs725567	rs725567	20	10004874	PAK7	intron	0,03	1,00
rs725565	rs725565	20	10005010	PAK7	intron	0,03	1,00
rs513998	rs513998	20	10010393	PAK7	intron	0,03	1,00
rs2024802	rs2024802	20	10028146	PAK7	intron	0,03	1,00
rs524625	rs524625	20	10030452	PAK7	intron	0,03	1,00
rs656111	rs656111	20	10030931	PAK7	intron	0,03	1,00
rs604452	rs604452	20	10034306	PAK7	intron	0,03	1,00
rs6087119	rs6087119	20	10036202	PAK7	intron	0,03	1,00
rs663380	rs663380	20	10044849	PAK7	intron	0,03	1,00
rs674630	rs674630	20	10045078	PAK7	intron	0,03	1,00
rs660454	rs660454	20	10050828	PAK7	intron	0,03	1,00
rs576874	rs576874	20	10055467	PAK7	intron	0,03	1,00
rs6057132	rs6057132	20	10055480	PAK7	intron	0,03	1,00
rs668473	rs668473	20	10058248	PAK7	intron	0,03	1,00
rs551927	rs551927	20	10064529	PAK7	intron	0,03	1,00
rs6104550	rs6104550	20	10068488	PAK7	intron	0,03	1,00
rs602209	rs602209	20	10073793	PAK7	flanking_5UTR	0,03	1,00
rs6133794	rs6133794	20	10076860	PAK7	flanking_5UTR	0,03	1,00
rs6039702	rs6039702	20	10082476	PAK7	flanking_5UTR	0,03	1,00
rs6074096	rs6074096	20	10085320	PAK7	flanking_5UTR	0,03	1,00
rs608188	rs608188	20	10087394	PAK7	flanking_5UTR	0,03	1,00
rs670562	rs670562	20	10090764	PAK7	flanking_5UTR	0,03	1,00
rs598563	rs598563	20	10106429	PAK7	flanking_5UTR	0,03	1,00
rs510915	rs510915	20	10108941	PAK7	flanking_5UTR	0,03	1,00
rs6032802	rs6032802	20	10115599	PAK7	flanking_5UTR	0,03	1,00
rs2144567	rs2144567	20	10122212	PAK7	flanking_5UTR	0,03	1,00
rs2210585	rs2210585	20	10129600	PAK7	flanking_5UTR	0,03	1,00
rs2210578	rs2210578	20	10136402	PAK7	flanking_5UTR	0,03	1,00
rs6039743	rs6039743	20	10140090	PAK7	flanking_5UTR	0,03	1,00
rs6108431	rs6108431	20	10146479	PAK7	flanking_5UTR	0,03	1,00
rs6077680	rs6077680	20	10152059	ANKRD5	flanking_5UTR	0,03	1,00
rs10485738	rs10485738	20	10152526	ANKRD5	flanking_5UTR	0,03	1,00
rs1999552	rs1999552	20	10161225	ANKRD5	flanking_5UTR	0,03	1,00
rs17518345	rs17518345	20	10164632	ANKRD5	flanking_5UTR	0,03	1,00
rs4813919	rs4813919	20	10171007	ANKRD5	flanking_5UTR	0,03	1,00
rs6039763	rs6039763	20	10183517	ANKRD5	flanking_5UTR	0,03	1,00
rs4813023	rs4813023	20	10194246	ANKRD5	flanking_5UTR	0,03	1,00
rs6104567	rs6104567	20	10195433	ANKRD5	flanking_5UTR	0,03	1,00
rs1889189	rs1889189	20	10197086	ANKRD5	flanking_5UTR	0,03	1,00
rs6039769	rs6039769	20	10198954	ANKRD5	flanking_5UTR	0,03	1,00
rs6032826	rs6032826	20	10203817	ANKRD5	flanking_5UTR	0,03	1,00
rs2423487	rs2423487	20	10213095	ANKRD5	flanking_5UTR	0,03	1,00
rs363032	rs363032	20	10218644	ANKRD5	flanking_5UTR	0,03	1,00
rs363039	rs363039	20	10220496	ANKRD5	flanking_5UTR	0,03	1,00
rs363043	rs363043	20	10226146	ANKRD5	flanking_5UTR	0,03	1,00
rs363016	rs363016	20	10231174	ANKRD5	flanking_5UTR	0,03	1,00
rs6074113	rs6074113	20	10242011	ANKRD5	flanking_5UTR	0,03	1,00
rs362563	rs362563	20	10243251	ANKRD5	flanking_5UTR	0,03	1,00
rs362567	rs362567	20	10246091	ANKRD5	flanking_5UTR	0,03	1,00
rs362569	rs362569	20	10246733	ANKRD5	flanking_5UTR	0,03	1,00
rs362584	rs362584	20	10254475	ANKRD5	flanking_5UTR	0,03	1,00
rs6077718	rs6077718	20	10261142	ANKRD5	flanking_5UTR	0,03	1,00
rs6039807	rs6039807	20	10263576	ANKRD5	flanking_5UTR	0,03	1,00
rs2284297	rs2284297	20	10265897	ANKRD5	flanking_5UTR	0,03	1,00
rs6108463	rs6108463	20	10280505	ANKRD5	intron	0,03	1,00
rs362988	rs362988	20	10281370	ANKRD5	coding	0,03	1,00
rs4813925	rs4813925	20	10286313	ANKRD5	intron	0,03	1,00
rs362599	rs362599	20	10291812	ANKRD5	intron	0,03	1,00
rs6077729	rs6077729	20	10295568	ANKRD5	coding	0,03	1,00
rs362552	rs362552	20	10296217	ANKRD5	flanking_3UTR	0,03	1,00
rs7272324	rs7272324	20	10302333	ANKRD5	flanking_3UTR	0,03	1,00
rs6133861	rs6133861	20	10304269	ANKRD5	flanking_3UTR	0,03	1,00
rs6108469	rs6108469	20	10304374	ANKRD5	flanking_3UTR	0,03	1,00
rs6133868	rs6133868	20	10307626	ANKRD5	flanking_3UTR	0,03	1,00
rs362614	rs362614	20	10310449	ANKRD5	flanking_3UTR	0,03	1,00
rs362620	rs362620	20	10314383	ANKRD5	flanking_3UTR	0,03	1,00
rs6133869	rs6133869	20	10320196	ANKRD5	flanking_3UTR	0,03	1,00
rs362623	rs362623	20	10324087	ANKRD5	flanking_3UTR	0,03	1,00
rs11087010	rs11087010	20	10329195	ANKRD5	flanking_3UTR	0,03	1,00
rs362560	rs362560	20	10329347	ANKRD5	flanking_3UTR	0,03	1,00
rs2206161	rs2206161	20	10334969	ANKRD5	flanking_3UTR	0,03	1,00
rs6104583	rs6104583	20	10337546	ANKRD5	flanking_3UTR	0,03	1,00
rs2327290	rs2327290	20	10347418	ANKRD5	flanking_3UTR	0,03	1,00
rs6039885	rs6039885	20	10351696	ANKRD5	flanking_3UTR	0,03	1,00
rs6074125	rs6074125	20	10360051	ANKRD5	flanking_3UTR	0,03	1,00
rs6039899	rs6039899	20	10365407	ANKRD5	flanking_3UTR	0,03	1,00
rs2327293	rs2327293	20	10366398	SNAP25	flanking_5UTR	0,03	1,00
rs6108519	rs6108519	20	10367909	SNAP25	flanking_5UTR	0,03	1,00
rs6032871	rs6032871	20	10368744	SNAP25	flanking_5UTR	0,03	1,00
rs1545	rs1545	20	10386013	SNAP25	flanking_5UTR	0,03	1,00
rs1547	rs1547	20	10386059	SNAP25	flanking_5UTR	0,03	1,00
rs6133927	rs6133927	20	10406156	SNAP25	flanking_5UTR	0,03	1,00
rs6108571	rs6108571	20	10410320	SNAP25	flanking_5UTR	0,03	1,00
rs6074138	rs6074138	20	10418801	SNAP25	flanking_5UTR	0,03	1,00
rs6077793	rs6077793	20	10422512	SNAP25	flanking_5UTR	0,03	1,00
rs2327282	rs2327282	20	10427960	SNAP25	flanking_5UTR	0,03	1,00
rs6032881	rs6032881	20	10432766	SNAP25	flanking_5UTR	0,03	1,00
rs6077809	rs6077809	20	10449857	SNAP25	flanking_5UTR	0,03	1,00
rs225143	rs225143	20	10451891	SNAP25	flanking_5UTR	0,03	1,00
rs225146	rs225146	20	10454074	SNAP25	flanking_5UTR	0,03	1,00
rs708934	rs708934	20	10456586	SNAP25	flanking_5UTR	0,03	1,00
rs6108599	rs6108599	20	10458953	SNAP25	intron	0,03	1,00
rs6039984	rs6039984	20	10466982	SNAP25	intron	0,03	1,00
rs619550	rs619550	20	10471029	SNAP25	intron	0,03	1,00
rs998934	rs998934	20	10482703	SNAP25	intron	0,03	1,00
rs8114269	rs8114269	20	10492279	SNAP25	intron	0,03	1,00
rs628473	rs628473	20	10515891	SNAP25	intron	0,03	1,00
rs667940	rs667940	20	10524793	SNAP25	intron	0,03	1,00
rs651877	rs651877	20	10532455	SNAP25	intron	0,03	1,00
rs6040028	rs6040028	20	10549503	SNAP25	intron	0,03	1,00
rs656478	rs656478	20	10562658	SNAP25	intron	0,03	1,00
rs682562	rs682562	20	10563908	SNAP25	intron	0,03	1,00
rs6074159	rs6074159	20	10576470	SNAP25	intron	0,03	1,00
rs16991848	rs16991848	20	10586234	SNAP25	intron	0,03	1,00
rs6032908	rs6032908	20	10588773	SNAP25	intron	0,03	1,00
cnvi0010465	cnvi0010465	20	10593563	SNAP25	intron	0,03	1,00
cnvi0010466	cnvi0010466	20	10594009	SNAP25	intron	0,03	1,00
cnvi0010467	cnvi0010467	20	10594450	SNAP25	intron	0,03	1,00
rs7270364	rs7270364	20	10602566	SNAP25	flanking_3UTR	0,03	1,00
rs1232597	rs1232597	20	10605631	SNAP25	flanking_3UTR	0,03	1,00
rs8708	rs8708	20	10618574	SNAP25	flanking_3UTR	0,03	1,00
rs1051421	rs1051421	20	10620275	SNAP25	flanking_3UTR	0,03	1,00
rs6108653	rs6108653	20	10629872	SNAP25	flanking_3UTR	0,03	1,00
rs6040055	rs6040055	20	10633313	SNAP25	flanking_3UTR	0,03	1,00
rs2273061	rs2273061	20	10639543	SNAP25	flanking_3UTR	0,03	1,00
rs6040065	rs6040065	20	10643051	SNAP25	flanking_3UTR	0,03	1,00
rs910118	rs910118	20	10656087	SNAP25	flanking_3UTR	0,03	1,00
rs6074170	rs6074170	20	10671078	SNAP25	flanking_3UTR	0,03	1,00
rs12233274	rs12233274	20	10679784	SNAP25	flanking_3UTR	0,03	1,00
rs6040095	rs6040095	20	10680221	MKKS	flanking_3UTR	0,03	1,00
rs10485745	rs10485745	20	10692782	MKKS	flanking_3UTR	0,03	1,00
rs6077888	rs6077888	20	10692989	MKKS	flanking_3UTR	0,03	1,00
rs2423516	rs2423516	20	10706876	MKKS	flanking_3UTR	0,03	1,00
rs2181219	rs2181219	20	10724637	MKKS	flanking_3UTR	0,03	1,00
rs1022790	rs1022790	20	10730759	MKKS	flanking_3UTR	0,03	1,00
rs6104657	rs6104657	20	10738950	MKKS	flanking_3UTR	0,03	1,00
rs6108695	rs6108695	20	10743024	MKKS	flanking_3UTR	0,03	1,00
rs6134031	rs6134031	20	10752610	MKKS	coding	0,03	1,00
rs6032948	rs6032948	20	10759375	MKKS	coding	0,03	1,00
rs4813944	rs4813944	20	10769877	MKKS	intron	0,03	1,00
rs6104663	rs6104663	20	10773298	MKKS	intron	0,03	1,00
rs6040175	rs6040175	20	10793175	C20orf94	intron	0,03	1,00
rs1474817	rs1474817	20	10810739	C20orf94	intron	0,03	1,00
rs6134049	rs6134049	20	10823506	C20orf94	intron	0,03	1,00
rs6040194	rs6040194	20	10829979	C20orf94	intron	0,03	1,00
rs6108719	rs6108719	20	10834078	C20orf94	intron	0,03	1,00
rs2024683	rs2024683	20	10843840	C20orf94	intron	0,03	1,00
rs6134059	rs6134059	20	10847148	C20orf94	intron	0,03	1,00
rs6134060	rs6134060	20	10847183	C20orf94	intron	0,03	1,00
rs1884136	rs1884136	20	10850464	C20orf94	intron	0,03	1,00
rs6077938	rs6077938	20	10852999	C20orf94	intron	0,03	1,00
rs6040218	rs6040218	20	10864326	C20orf94	intron	0,03	1,00
rs4813040	rs4813040	20	10887314	C20orf94	intron	0,03	1,00
rs16992031	rs16992031	20	10891172	C20orf94	intron	0,03	1,00
rs2144184	rs2144184	20	10891798	C20orf94	intron	0,03	1,00
rs12151925	rs12151925	20	10894564	C20orf94	intron	0,03	1,00
rs763383	rs763383	20	10897878	C20orf94	intron	0,03	1,00
rs1232587	rs1232587	20	10898466	C20orf94	intron	0,03	1,00
rs1327230	rs1327230	20	10901293	C20orf94	intron	0,03	1,00
rs1887319	rs1887319	20	10922146	C20orf94	intron	0,03	1,00
rs6108756	rs6108756	20	10929061	C20orf94	intron	0,03	1,00
rs6077977	rs6077977	20	10930708	C20orf94	intron	0,03	1,00
rs6104678	rs6104678	20	10934207	C20orf94	intron	0,03	1,00
rs767087	rs767087	20	10935414	C20orf94	intron	0,03	1,00
rs6074213	rs6074213	20	10938509	C20orf94	intron	0,03	1,00
rs1327231	rs1327231	20	10946100	C20orf94	intron	0,03	1,00
rs6040259	rs6040259	20	10951749	C20orf94	intron	0,03	1,00
rs11906936	rs11906936	20	10957137	C20orf94	flanking_3UTR	0,03	1,00
rs1887320	rs1887320	20	10965998	JAG1	3UTR	0,03	1,00
rs6077996	rs6077996	20	10972839	JAG1	coding	0,03	1,00
rs6108790	rs6108790	20	10974962	JAG1	intron	0,03	1,00
rs6077999	rs6077999	20	10975285	JAG1	intron	0,03	1,00
rs1041200	rs1041200	20	10979521	JAG1	intron	0,03	1,00
rs2026605	rs2026605	20	10985970	JAG1	intron	0,03	1,00
rs6104690	rs6104690	20	10988099	JAG1	intron	0,03	1,00
rs17189227	rs17189227	20	10988855	JAG1	intron	0,03	1,00
rs6108803	rs6108803	20	10994967	JAG1	intron	0,03	1,00
rs8118592	rs8118592	20	10996304	JAG1	flanking_5UTR	0,03	1,00
rs1926936	rs1926936	20	11005238	JAG1	flanking_5UTR	0,03	1,00
rs4813955	rs4813955	20	11008382	JAG1	flanking_5UTR	0,03	1,00
rs1327242	rs1327242	20	11026093	JAG1	flanking_5UTR	0,03	1,00
rs209939	rs209939	20	11026397	JAG1	flanking_5UTR	0,03	1,00
rs209938	rs209938	20	11027213	JAG1	flanking_5UTR	0,03	1,00
rs6074234	rs6074234	20	11028705	JAG1	flanking_5UTR	0,03	1,00
rs6131146	rs6131146	20	11031371	JAG1	flanking_5UTR	0,03	1,00
rs6078029	rs6078029	20	11037154	JAG1	flanking_5UTR	0,03	1,00
rs209935	rs209935	20	11044604	JAG1	flanking_5UTR	0,03	1,00
rs6104699	rs6104699	20	11046619	JAG1	flanking_5UTR	0,03	1,00
rs6040333	rs6040333	20	11054601	JAG1	flanking_5UTR	0,03	1,00
rs6074239	rs6074239	20	11056468	JAG1	flanking_5UTR	0,03	1,00
rs6040339	rs6040339	20	11056617	JAG1	flanking_5UTR	0,03	1,00
rs6033026	rs6033026	20	11059873	hCG_2045828	flanking_5UTR	0,03	1,00
rs4813046	rs4813046	20	11060629	hCG_2045828	flanking_5UTR	0,03	1,00
rs6040345	rs6040345	20	11063477	hCG_2045828	flanking_5UTR	0,03	1,00
rs769002	rs769002	20	11072081	hCG_2045828	flanking_5UTR	0,03	1,00
rs4142364	rs4142364	20	11086830	hCG_2045828	flanking_5UTR	0,03	1,00
rs6040357	rs6040357	20	11091458	hCG_2045828	flanking_5UTR	0,03	1,00
rs2144148	rs2144148	20	11100677	hCG_2045828	flanking_5UTR	0,03	1,00
rs6108834	rs6108834	20	11115732	hCG_2045828	flanking_5UTR	0,03	1,00
rs3920525	rs3920525	20	11134907	hCG_2045828	flanking_5UTR	0,03	1,00
rs6108845	rs6108845	20	11135914	hCG_2045828	flanking_5UTR	0,03	1,00
rs1033580	rs1033580	20	11142095	hCG_2045828	flanking_5UTR	0,03	1,00
rs1028479	rs1028479	20	11144338	hCG_2045828	flanking_5UTR	0,03	1,00
rs6033042	rs6033042	20	11150437	hCG_2045828	flanking_5UTR	0,03	1,00
rs6040396	rs6040396	20	11155202	hCG_2045828	flanking_5UTR	0,03	1,00
rs6040409	rs6040409	20	11163049	hCG_2045828	flanking_5UTR	0,03	1,00
rs4813962	rs4813962	20	11167333	hCG_2045828	flanking_5UTR	0,03	1,00
rs2207412	rs2207412	20	11177529	hCG_2045828	flanking_5UTR	0,03	1,00
rs6033055	rs6033055	20	11180923	hCG_2045828	flanking_5UTR	0,03	1,00
rs2207101	rs2207101	20	11190087	hCG_2045828	flanking_5UTR	0,03	1,00
rs2327345	rs2327345	20	11194225	hCG_2045828	flanking_5UTR	0,03	1,00
rs6040435	rs6040435	20	11199973	hCG_2045828	flanking_5UTR	0,03	1,00
rs6040449	rs6040449	20	11209522	hCG_2045828	flanking_5UTR	0,03	1,00
rs6108872	rs6108872	20	11218764	hCG_2045828	flanking_5UTR	0,03	1,00
rs4449208	rs4449208	20	11232101	hCG_2045828	flanking_5UTR	0,03	1,00
rs6040486	rs6040486	20	11239118	hCG_2045828	flanking_5UTR	0,03	1,00
rs6108881	rs6108881	20	11239243	hCG_2045828	flanking_5UTR	0,03	1,00
rs4813974	rs4813974	20	11242433	hCG_2045828	flanking_5UTR	0,03	1,00
rs6033076	rs6033076	20	11247552	hCG_2045828	flanking_5UTR	0,03	1,00
rs6033079	rs6033079	20	11253554	hCG_2045828	flanking_5UTR	0,03	1,00
rs4813982	rs4813982	20	11258632	hCG_2045828	flanking_5UTR	0,03	1,00
rs16992356	rs16992356	20	11262159	hCG_2045828	flanking_5UTR	0,03	1,00
rs6040510	rs6040510	20	11266525	hCG_2045828	flanking_5UTR	0,03	1,00
rs1997877	rs1997877	20	11271614	hCG_2045828	flanking_5UTR	0,03	1,00
rs6040514	rs6040514	20	11272861	hCG_2045828	flanking_5UTR	0,03	1,00
rs6078121	rs6078121	20	11277755	hCG_2045828	flanking_5UTR	0,03	1,00
rs6033101	rs6033101	20	11297353	hCG_2045828	flanking_3UTR	0,03	1,00
rs1119133	rs1119133	20	11303203	hCG_2045828	flanking_3UTR	0,03	1,00
rs10485747	rs10485747	20	11305191	hCG_2045828	flanking_3UTR	0,03	1,00
rs6134198	rs6134198	20	11310509	hCG_2045828	flanking_3UTR	0,03	1,00
rs2327403	rs2327403	20	11347455	hCG_2045828	flanking_3UTR	0,03	1,00
rs6134228	rs6134228	20	11359450	hCG_2045828	flanking_3UTR	0,03	1,00
rs2327411	rs2327411	20	11374863	hCG_2045828	flanking_3UTR	0,03	1,00
rs6040628	rs6040628	20	11383824	hCG_2045828	flanking_3UTR	0,03	1,00
rs6040638	rs6040638	20	11390446	hCG_2045828	flanking_3UTR	0,03	1,00
rs1009748	rs1009748	20	11390766	hCG_2045828	flanking_3UTR	0,03	1,00
rs6040669	rs6040669	20	11412024	hCG_2045828	flanking_3UTR	0,03	1,00
rs7352410	rs7352410	20	11415087	hCG_2045828	flanking_3UTR	0,03	1,00
rs10485749	rs10485749	20	11426730	hCG_2045828	flanking_3UTR	0,03	1,00
rs6033146	rs6033146	20	11437119	hCG_2045828	flanking_3UTR	0,03	1,00
rs730183	rs730183	20	11442419	hCG_2045828	flanking_3UTR	0,03	1,00
rs6131222	rs6131222	20	11479391	hCG_2045828	flanking_3UTR	0,03	1,00
rs4814019	rs4814019	20	11508980	hCG_2045828	flanking_3UTR	0,03	1,00
rs6131233	rs6131233	20	11510559	hCG_2045828	flanking_3UTR	0,03	1,00
rs6033173	rs6033173	20	11515533	hCG_2045828	flanking_3UTR	0,03	1,00
rs767482	rs767482	20	11515549	hCG_2045828	flanking_3UTR	0,03	1,00
rs6134281	rs6134281	20	11516418	hCG_2045828	flanking_3UTR	0,03	1,00
rs2423569	rs2423569	20	11526470	hCG_2045828	flanking_3UTR	0,03	1,00
rs6134296	rs6134296	20	11542289	hCG_2045828	flanking_3UTR	0,03	1,00
rs6109040	rs6109040	20	11542632	hCG_2045828	flanking_3UTR	0,03	1,00
rs4813059	rs4813059	20	11546933	hCG_2045828	flanking_3UTR	0,03	1,00
rs2327423	rs2327423	20	11550545	hCG_2045828	flanking_3UTR	0,03	1,00
rs2144642	rs2144642	20	11553926	hCG_2045828	flanking_3UTR	0,03	1,00
rs6131239	rs6131239	20	11561801	hCG_2045828	flanking_3UTR	0,03	1,00
rs4814027	rs4814027	20	11566512	hCG_2045828	flanking_3UTR	0,03	1,00
rs6033187	rs6033187	20	11574717	hCG_2045828	flanking_3UTR	0,03	1,00
rs13039653	rs13039653	20	11788104	LOC441940	flanking_3UTR	0,03	1,00
rs803665	rs803665	20	11791008	LOC441940	flanking_3UTR	0,03	1,00
rs991936	rs991936	20	11796675	LOC441940	flanking_3UTR	0,03	1,00
rs6078353	rs6078353	20	11799880	LOC441940	flanking_3UTR	0,03	1,00
rs2876304	rs2876304	20	11801668	LOC441940	flanking_3UTR	0,03	1,00
rs6078518	rs6078518	20	12299029	BTBD3	flanking_3UTR	0,03	1,00
rs6074401	rs6074401	20	12302448	BTBD3	flanking_3UTR	0,03	1,00
rs6041265	rs6041265	20	12307489	BTBD3	flanking_3UTR	0,03	1,00
rs6033377	rs6033377	20	12311995	BTBD3	flanking_3UTR	0,03	1,00
rs4633985	rs4633985	20	12339384	BTBD3	flanking_3UTR	0,03	1,00
rs3891632	rs3891632	20	12354280	BTBD3	flanking_3UTR	0,03	1,00
rs4814097	rs4814097	20	12358420	BTBD3	flanking_3UTR	0,03	1,00
rs6131329	rs6131329	20	12361322	BTBD3	flanking_3UTR	0,03	1,00
rs6131330	rs6131330	20	12361500	BTBD3	flanking_3UTR	0,03	1,00
rs6033393	rs6033393	20	12361558	BTBD3	flanking_3UTR	0,03	1,00
rs1885830	rs1885830	20	12364263	BTBD3	flanking_3UTR	0,03	1,00
rs6134530	rs6134530	20	12369473	BTBD3	flanking_3UTR	0,03	1,00
rs6109387	rs6109387	20	12376181	BTBD3	flanking_3UTR	0,03	1,00
rs6104893	rs6104893	20	12390159	BTBD3	flanking_3UTR	0,03	1,00
rs2208973	rs2208973	20	12394990	BTBD3	flanking_3UTR	0,03	1,00
rs6109397	rs6109397	20	12401534	BTBD3	flanking_3UTR	0,03	1,00
rs6074422	rs6074422	20	12409264	BTBD3	flanking_3UTR	0,03	1,00
rs6078568	rs6078568	20	12409405	BTBD3	flanking_3UTR	0,03	1,00
rs2024782	rs2024782	20	12417543	BTBD3	flanking_3UTR	0,03	1,00
rs6109417	rs6109417	20	12433285	BTBD3	flanking_3UTR	0,03	1,00
rs10485754	rs10485754	20	12438304	BTBD3	flanking_3UTR	0,03	1,00
rs1884358	rs1884358	20	12444714	BTBD3	flanking_3UTR	0,03	1,00
rs6041385	rs6041385	20	12464327	BTBD3	flanking_3UTR	0,03	1,00
rs6033432	rs6033432	20	12468998	BTBD3	flanking_3UTR	0,03	1,00
rs11905788	rs11905788	20	12479134	BTBD3	flanking_3UTR	0,03	1,00
rs10485756	rs10485756	20	12490053	BTBD3	flanking_3UTR	0,03	1,00
rs6109448	rs6109448	20	12495017	BTBD3	flanking_3UTR	0,03	1,00
rs6033438	rs6033438	20	12498992	BTBD3	flanking_3UTR	0,03	1,00
rs6041426	rs6041426	20	12505923	BTBD3	flanking_3UTR	0,03	1,00
rs6041429	rs6041429	20	12507646	BTBD3	flanking_3UTR	0,03	1,00
rs7266236	rs7266236	20	12512142	BTBD3	flanking_3UTR	0,03	1,00
rs10485758	rs10485758	20	12515217	BTBD3	flanking_3UTR	0,03	1,00
rs2009018	rs2009018	20	12515600	BTBD3	flanking_3UTR	0,03	1,00
rs6074460	rs6074460	20	12533539	BTBD3	flanking_3UTR	0,03	1,00
rs6109480	rs6109480	20	12559521	BTBD3	flanking_3UTR	0,03	1,00
rs6109487	rs6109487	20	12572733	BTBD3	flanking_3UTR	0,03	1,00
rs10485759	rs10485759	20	12579343	BTBD3	flanking_3UTR	0,03	1,00
rs1452331	rs1452331	20	12581288	BTBD3	flanking_3UTR	0,03	1,00
rs6041478	rs6041478	20	12589937	BTBD3	flanking_3UTR	0,03	1,00
rs1901561	rs1901561	20	12602470	BTBD3	flanking_3UTR	0,03	1,00
rs6078701	rs6078701	20	12608070	BTBD3	flanking_3UTR	0,03	1,00
rs6104937	rs6104937	20	12611985	BTBD3	flanking_3UTR	0,03	1,00
rs12480885	rs12480885	20	12614084	BTBD3	flanking_3UTR	0,03	1,00
rs1377033	rs1377033	20	12623161	BTBD3	flanking_3UTR	0,03	1,00
rs6033471	rs6033471	20	12625305	BTBD3	flanking_3UTR	0,03	1,00
rs6131371	rs6131371	20	12631731	BTBD3	flanking_3UTR	0,03	1,00
rs761241	rs761241	20	12632854	BTBD3	flanking_3UTR	0,03	1,00
rs6134632	rs6134632	20	12663090	BTBD3	flanking_3UTR	0,03	1,00
rs912546	rs912546	20	12676818	BTBD3	flanking_3UTR	0,03	1,00
rs6134639	rs6134639	20	12679627	BTBD3	flanking_3UTR	0,03	1,00
rs6134640	rs6134640	20	12680016	BTBD3	flanking_3UTR	0,03	1,00
rs6041567	rs6041567	20	12686905	BTBD3	flanking_3UTR	0,03	1,00
rs2093892	rs2093892	20	12688384	BTBD3	flanking_3UTR	0,03	1,00
rs1333400	rs1333400	20	12693139	BTBD3	flanking_3UTR	0,03	1,00
rs2151447	rs2151447	20	12702515	BTBD3	flanking_3UTR	0,03	1,00
rs944861	rs944861	20	12703357	BTBD3	flanking_3UTR	0,03	1,00
rs1333391	rs1333391	20	12704848	BTBD3	flanking_3UTR	0,03	1,00
rs1930802	rs1930802	20	12706277	BTBD3	flanking_3UTR	0,03	1,00
rs6104958	rs6104958	20	12707998	BTBD3	flanking_3UTR	0,03	1,00
rs6033504	rs6033504	20	12713069	BTBD3	flanking_3UTR	0,03	1,00
rs2210566	rs2210566	20	12713699	BTBD3	flanking_3UTR	0,03	1,00
rs6134655	rs6134655	20	12718736	SPTLC3	flanking_5UTR	0,03	1,00
rs6104961	rs6104961	20	12722247	SPTLC3	flanking_5UTR	0,03	1,00
rs6109533	rs6109533	20	12724326	SPTLC3	flanking_5UTR	0,03	1,00
rs6041592	rs6041592	20	12725486	SPTLC3	flanking_5UTR	0,03	1,00
rs6109534	rs6109534	20	12727209	SPTLC3	flanking_5UTR	0,03	1,00
rs6041595	rs6041595	20	12730872	SPTLC3	flanking_5UTR	0,03	1,00
rs6104966	rs6104966	20	12733591	SPTLC3	flanking_5UTR	0,03	1,00
rs845586	rs845586	20	12743808	SPTLC3	flanking_5UTR	0,03	1,00
rs845587	rs845587	20	12744198	SPTLC3	flanking_5UTR	0,03	1,00
rs1013211	rs1013211	20	12746333	SPTLC3	flanking_5UTR	0,03	1,00
rs845582	rs845582	20	12751893	SPTLC3	flanking_5UTR	0,03	1,00
rs6514322	rs6514322	20	12755515	SPTLC3	flanking_5UTR	0,03	1,00
rs845567	rs845567	20	12763016	SPTLC3	flanking_5UTR	0,03	1,00
rs845570	rs845570	20	12764074	SPTLC3	flanking_5UTR	0,03	1,00
rs845575	rs845575	20	12769237	SPTLC3	flanking_5UTR	0,03	1,00
rs708957	rs708957	20	12771339	SPTLC3	flanking_5UTR	0,03	1,00
rs1099620	rs1099620	20	12790724	SPTLC3	flanking_5UTR	0,03	1,00
rs6041636	rs6041636	20	12796624	SPTLC3	flanking_5UTR	0,03	1,00
rs6131392	rs6131392	20	12802694	SPTLC3	flanking_5UTR	0,03	1,00
rs6033531	rs6033531	20	12845707	SPTLC3	flanking_5UTR	0,03	1,00
rs10485763	rs10485763	20	12856917	SPTLC3	flanking_5UTR	0,03	1,00
rs6041692	rs6041692	20	12857733	SPTLC3	flanking_5UTR	0,03	1,00
rs6109595	rs6109595	20	12861103	SPTLC3	flanking_5UTR	0,03	1,00
rs6078811	rs6078811	20	12876782	SPTLC3	flanking_5UTR	0,03	1,00
rs1156282	rs1156282	20	12878426	SPTLC3	flanking_5UTR	0,03	1,00
rs957291	rs957291	20	12882611	SPTLC3	flanking_5UTR	0,03	1,00
rs439580	rs439580	20	12888105	SPTLC3	flanking_5UTR	0,03	1,00
rs6134717	rs6134717	20	12890206	SPTLC3	flanking_5UTR	0,03	1,00
rs127556	rs127556	20	12898678	SPTLC3	flanking_5UTR	0,03	1,00
rs165557	rs165557	20	12898764	SPTLC3	flanking_5UTR	0,03	1,00
rs3908399	rs3908399	20	12901275	SPTLC3	flanking_5UTR	0,03	1,00
rs3898706	rs3898706	20	12901895	SPTLC3	flanking_5UTR	0,03	1,00
rs6041737	rs6041737	20	12941696	SPTLC3	flanking_5UTR	0,03	1,00
rs433279	rs433279	20	12944539	SPTLC3	flanking_5UTR	0,03	1,00
rs6131414	rs6131414	20	12945669	SPTLC3	flanking_5UTR	0,03	1,00
rs6041739	rs6041739	20	12947126	SPTLC3	flanking_5UTR	0,03	1,00
rs680379	rs680379	20	12969400	SPTLC3	flanking_5UTR	0,03	1,00
rs3903704	rs3903704	20	12969909	SPTLC3	flanking_5UTR	0,03	1,00
rs2327450	rs2327450	20	12977506	SPTLC3	flanking_5UTR	0,03	1,00
rs2327449	rs2327449	20	12978403	SPTLC3	flanking_5UTR	0,03	1,00
rs6074541	rs6074541	20	12978517	SPTLC3	flanking_5UTR	0,03	1,00
rs3843766	rs3843766	20	12981561	SPTLC3	flanking_5UTR	0,03	1,00
rs168621	rs168621	20	12986593	SPTLC3	flanking_5UTR	0,03	1,00
rs360534	rs360534	20	12988524	SPTLC3	flanking_5UTR	0,03	1,00
rs6041762	rs6041762	20	12988611	SPTLC3	flanking_5UTR	0,03	1,00
rs3761896	rs3761896	20	12989901	SPTLC3	flanking_5UTR	0,03	1,00
rs6041764	rs6041764	20	12990702	SPTLC3	flanking_5UTR	0,03	1,00
rs3848762	rs3848762	20	12995113	SPTLC3	flanking_5UTR	0,03	1,00
rs6041768	rs6041768	20	12999157	SPTLC3	flanking_5UTR	0,03	1,00
rs11698429	rs11698429	20	13009926	SPTLC3	flanking_5UTR	0,03	1,00
rs17812085	rs17812085	20	13011261	SPTLC3	flanking_5UTR	0,03	1,00
rs919607	rs919607	20	13015398	SPTLC3	flanking_5UTR	0,03	1,00
rs1897293	rs1897293	20	13023715	SPTLC3	flanking_5UTR	0,03	1,00
rs1835661	rs1835661	20	13025560	SPTLC3	flanking_5UTR	0,03	1,00
rs1431431	rs1431431	20	13035593	SPTLC3	flanking_5UTR	0,03	1,00
rs6041821	rs6041821	20	13036800	SPTLC3	flanking_5UTR	0,03	1,00
rs4814194	rs4814194	20	13040254	SPTLC3	flanking_5UTR	0,03	1,00
rs2749391	rs2749391	20	13045437	SPTLC3	flanking_5UTR	0,03	1,00
rs243881	rs243881	20	13048263	SPTLC3	flanking_5UTR	0,03	1,00
rs3848767	rs3848767	20	13049532	SPTLC3	flanking_5UTR	0,03	1,00
rs243887	rs243887	20	13053018	SPTLC3	flanking_5UTR	0,03	1,00
rs6041842	rs6041842	20	13054307	SPTLC3	flanking_5UTR	0,03	1,00
rs10485764	rs10485764	20	13056070	SPTLC3	flanking_5UTR	0,03	1,00
rs6109686	rs6109686	20	13058296	SPTLC3	flanking_5UTR	0,03	1,00
rs2327690	rs2327690	20	13061302	SPTLC3	flanking_5UTR	0,03	1,00
rs6131432	rs6131432	20	13062569	SPTLC3	flanking_5UTR	0,03	1,00
rs6109692	rs6109692	20	13071816	SPTLC3	flanking_5UTR	0,03	1,00
rs6074557	rs6074557	20	13079630	SPTLC3	flanking_5UTR	0,03	1,00
rs882302	rs882302	20	13083590	SPTLC3	flanking_5UTR	0,03	1,00
rs6109703	rs6109703	20	13084085	SPTLC3	flanking_5UTR	0,03	1,00
rs6041870	rs6041870	20	13092482	SPTLC3	flanking_5UTR	0,03	1,00
rs1014380	rs1014380	20	13095232	SPTLC3	flanking_5UTR	0,03	1,00
rs6074558	rs6074558	20	13097311	SPTLC3	flanking_5UTR	0,03	1,00
rs4814204	rs4814204	20	13110773	SPTLC3	flanking_5UTR	0,03	1,00
rs6033623	rs6033623	20	13112699	SPTLC3	flanking_5UTR	0,03	1,00
rs6041890	rs6041890	20	13115148	SPTLC3	flanking_5UTR	0,03	1,00
rs6078936	rs6078936	20	13118901	SPTLC3	flanking_5UTR	0,03	1,00
rs6041898	rs6041898	20	13120935	SPTLC3	flanking_5UTR	0,03	1,00
rs6078937	rs6078937	20	13130096	SPTLC3	flanking_5UTR	0,03	1,00
rs6078938	rs6078938	20	13134768	SPTLC3	flanking_5UTR	0,03	1,00
rs4510290	rs4510290	20	13146314	SPTLC3	flanking_5UTR	0,03	1,00
rs6041937	rs6041937	20	13151531	SPTLC3	flanking_5UTR	0,03	1,00
rs4642012	rs4642012	20	13162656	SPTLC3	flanking_5UTR	0,03	1,00
rs8123440	rs8123440	20	13180241	SPTLC3	flanking_5UTR	0,03	1,00
rs1923342	rs1923342	20	13180632	SPTLC3	flanking_5UTR	0,03	1,00
rs1923346	rs1923346	20	13192095	SPTLC3	flanking_5UTR	0,03	1,00
rs17226481	rs17226481	20	13193586	SPTLC3	flanking_5UTR	0,03	1,00
rs6033643	rs6033643	20	13205338	SPTLC3	flanking_5UTR	0,03	1,00
rs6109769	rs6109769	20	13216257	SPTLC3	flanking_5UTR	0,03	1,00
rs6105055	rs6105055	20	13220348	SPTLC3	flanking_5UTR	0,03	1,00
rs721243	rs721243	20	13220601	SPTLC3	flanking_5UTR	0,03	1,00
rs6109781	rs6109781	20	13233011	SPTLC3	flanking_5UTR	0,03	1,00
rs8116153	rs8116153	20	13234124	SPTLC3	flanking_5UTR	0,03	1,00
rs6074574	rs6074574	20	13235157	SPTLC3	flanking_5UTR	0,03	1,00
rs243898	rs243898	20	13237714	SPTLC3	flanking_5UTR	0,03	1,00
rs10485765	rs10485765	20	13238583	SPTLC3	flanking_5UTR	0,03	1,00
rs243903	rs243903	20	13242166	SPTLC3	5UTR	0,03	1,00
rs7263067	rs7263067	20	13246983	SPTLC3	intron	0,03	1,00
rs6033654	rs6033654	20	13247500	SPTLC3	intron	0,03	1,00
rs11907045	rs11907045	20	13249889	SPTLC3	intron	0,03	1,00
rs6041977	rs6041977	20	13251844	SPTLC3	intron	0,03	1,00
rs6109792	rs6109792	20	13256786	SPTLC3	intron	0,03	1,00
rs6041981	rs6041981	20	13257470	SPTLC3	intron	0,03	1,00
rs4814213	rs4814213	20	13261075	SPTLC3	intron	0,03	1,00
rs719628	rs719628	20	13262487	SPTLC3	intron	0,03	1,00
rs6041989	rs6041989	20	13264302	SPTLC3	flanking_3UTR	0,03	1,00
rs4814215	rs4814215	20	13270683	SPTLC3	flanking_3UTR	0,03	1,00
rs6078976	rs6078976	20	13270765	SPTLC3	flanking_3UTR	0,03	1,00
rs2327771	rs2327771	20	13276381	SPTLC3	flanking_3UTR	0,03	1,00
rs1076052	rs1076052	20	13287505	SPTLC3	flanking_3UTR	0,03	1,00
rs653215	rs653215	20	13288371	SPTLC3	flanking_3UTR	0,03	1,00
rs6078983	rs6078983	20	13290738	SPTLC3	flanking_3UTR	0,03	1,00
rs1223271	rs1223271	20	13296912	SPTLC3	flanking_3UTR	0,03	1,00
rs1575249	rs1575249	20	13296953	SPTLC3	flanking_3UTR	0,03	1,00
rs4814225	rs4814225	20	13300820	SPTLC3	flanking_3UTR	0,03	1,00
rs477184	rs477184	20	13301361	SPTLC3	flanking_3UTR	0,03	1,00
rs6074591	rs6074591	20	13311983	SPTLC3	flanking_3UTR	0,03	1,00
rs6042028	rs6042028	20	13314812	SPTLC3	flanking_3UTR	0,03	1,00
rs6131464	rs6131464	20	13320457	SPTLC3	flanking_3UTR	0,03	1,00
rs6042033	rs6042033	20	13324054	SPTLC3	flanking_3UTR	0,03	1,00
rs1321294	rs1321294	20	13336996	SPTLC3	flanking_3UTR	0,03	1,00
rs1321296	rs1321296	20	13344672	SPTLC3	flanking_3UTR	0,03	1,00
rs13037506	rs13037506	20	13363699	SPTLC3	flanking_3UTR	0,03	1,00
rs4813127	rs4813127	20	13366624	SPTLC3	flanking_3UTR	0,03	1,00
rs6079035	rs6079035	20	13368741	SPTLC3	flanking_3UTR	0,03	1,00
rs6105083	rs6105083	20	13373430	SPTLC3	flanking_3UTR	0,03	1,00
cnvi0010471	cnvi0010471	20	13373710	SPTLC3	flanking_3UTR	0,03	1,00
rs8182881	rs8182881	20	13374177	LOC728600	flanking_5UTR	0,03	1,00
rs1474954	rs1474954	20	13399746	LOC728600	flanking_5UTR	0,03	1,00
rs6105094	rs6105094	20	13410638	LOC728600	flanking_5UTR	0,03	1,00
rs6131476	rs6131476	20	13438893	LOC728600	flanking_5UTR	0,03	1,00
rs6042136	rs6042136	20	13447896	LOC728600	flanking_5UTR	0,03	1,00
rs2273477	rs2273477	20	13463749	LOC728600	flanking_5UTR	0,03	1,00
rs6134892	rs6134892	20	13481654	LOC728600	flanking_5UTR	0,03	1,00
rs6033745	rs6033745	20	13507057	LOC728600	flanking_5UTR	0,03	1,00
rs6079095	rs6079095	20	13520928	LOC728600	flanking_5UTR	0,03	1,00
rs6079097	rs6079097	20	13526577	C20orf82	intron	0,03	1,00
rs4814242	rs4814242	20	13542423	C20orf82	intron	0,03	1,00
rs6134919	rs6134919	20	13562481	C20orf82	intron	0,03	1,00
rs2057259	rs2057259	20	13567570	C20orf82	intron	0,03	1,00
rs6134922	rs6134922	20	13570331	C20orf82	intron	0,03	1,00
rs6134928	rs6134928	20	13573415	C20orf82	intron	0,03	1,00
rs6134930	rs6134930	20	13582476	C20orf82	intron	0,03	1,00
rs6134938	rs6134938	20	13598705	C20orf82	intron	0,03	1,00
rs6514424	rs6514424	20	13600351	C20orf82	intron	0,03	1,00
rs6079123	rs6079123	20	13605773	C20orf82	intron	0,03	1,00
rs6033777	rs6033777	20	13607380	C20orf82	intron	0,03	1,00
rs2423729	rs2423729	20	13618382	C20orf82	intron	0,03	1,00
rs6105146	rs6105146	20	13641913	C20orf82	intron	0,03	1,00
rs8126271	rs8126271	20	13646988	C20orf82	intron	0,03	1,00
rs4441543	rs4441543	20	13650883	C20orf82	intron	0,03	1,00
rs4814251	rs4814251	20	13651870	C20orf82	intron	0,03	1,00
rs6033803	rs6033803	20	13661977	C20orf82	intron	0,03	1,00
rs6079136	rs6079136	20	13676152	C20orf82	intron	0,03	1,00
rs16994111	rs16994111	20	13677405	C20orf82	intron	0,03	1,00
rs6131512	rs6131512	20	13688842	C20orf82	intron	0,03	1,00
rs2026058	rs2026058	20	13691900	C20orf82	intron	0,03	1,00
rs6079149	rs6079149	20	13699281	C20orf82	intron	0,03	1,00
rs1541059	rs1541059	20	13702582	C20orf82	flanking_3UTR	0,03	1,00
rs6033810	rs6033810	20	13712393	C20orf82	flanking_3UTR	0,03	1,00
rs6042333	rs6042333	20	13727740	C20orf82	flanking_3UTR	0,03	1,00
rs6079161	rs6079161	20	13731813	C20orf82	flanking_3UTR	0,03	1,00
rs3180370	rs3180370	20	13747441	C20orf82	flanking_3UTR	0,03	1,00
rs10485767	rs10485767	20	13753470	C20orf82	flanking_3UTR	0,03	1,00
rs1999112	rs1999112	20	13770673	C20orf82	flanking_3UTR	0,03	1,00
rs6074640	rs6074640	20	13770745	C20orf82	flanking_3UTR	0,03	1,00
rs926976	rs926976	20	13781124	C20orf82	flanking_3UTR	0,03	1,00
rs4813143	rs4813143	20	13792741	C20orf82	flanking_3UTR	0,03	1,00
rs13042637	rs13042637	20	13804101	C20orf82	flanking_3UTR	0,03	1,00
rs2876363	rs2876363	20	13808426	TASP1	flanking_3UTR	0,03	1,00
rs6110057	rs6110057	20	13818297	TASP1	flanking_3UTR	0,03	1,00
rs6134981	rs6134981	20	13819111	TASP1	flanking_3UTR	0,03	1,00
rs2423760	rs2423760	20	13821604	TASP1	flanking_3UTR	0,03	1,00
rs6134989	rs6134989	20	13827916	TASP1	flanking_3UTR	0,03	1,00
rs2073290	rs2073290	20	13830137	TASP1	intron	0,03	1,00
rs2073291	rs2073291	20	13830382	TASP1	flanking_3UTR	0,03	1,00
rs6042394	rs6042394	20	13837607	TASP1	intron	0,03	1,00
rs4814268	rs4814268	20	13843293	TASP1	intron	0,03	1,00
rs243916	rs243916	20	13854827	TASP1	intron	0,04	1,00
rs6105175	rs6105175	20	13860624	TASP1	intron	0,04	1,00
rs11905248	rs11905248	20	13867165	TASP1	intron	0,04	1,00
rs6135002	rs6135002	20	13869206	TASP1	intron	0,04	1,00
rs6042418	rs6042418	20	13873572	TASP1	intron	0,04	1,00
rs6042425	rs6042425	20	13884010	TASP1	intron	0,04	1,00
rs1321238	rs1321238	20	13908548	TASP1	intron	0,04	1,00
rs2423762	rs2423762	20	13911291	TASP1	intron	0,04	1,00
rs6079229	rs6079229	20	13923319	TASP1	intron	0,04	1,00
rs6033855	rs6033855	20	13925524	TASP1	intron	0,04	1,00
rs6042449	rs6042449	20	13929943	TASP1	intron	0,04	1,00
rs6079235	rs6079235	20	13938789	TASP1	intron	0,04	1,00
rs6079240	rs6079240	20	13950270	TASP1	intron	0,04	1,00
rs6079241	rs6079241	20	13950946	TASP1	intron	0,04	1,00
rs6105196	rs6105196	20	13954879	TASP1	intron	0,04	1,00
rs3848777	rs3848777	20	13971235	TASP1	intron	0,04	1,00
rs6110117	rs6110117	20	13977991	TASP1	intron	0,04	1,00
rs6074674	rs6074674	20	13983704	TASP1	intron	0,04	1,00
rs2263684	rs2263684	20	13998098	TASP1	intron	0,04	1,00
rs2257832	rs2257832	20	14016348	TASP1	intron	0,04	1,00
rs6079264	rs6079264	20	14017070	TASP1	intron	0,04	1,00
rs6074678	rs6074678	20	14031392	TASP1	flanking_5UTR	0,04	1,00
rs6110153	rs6110153	20	14036529	TASP1	flanking_5UTR	0,04	1,00
rs3848779	rs3848779	20	14041179	TASP1	flanking_5UTR	0,04	1,00
rs4814277	rs4814277	20	14041207	TASP1	flanking_5UTR	0,04	1,00
rs10485771	rs10485771	20	14051103	ESF1	flanking_3UTR	0,04	1,00
rs4814278	rs4814278	20	14051325	ESF1	flanking_3UTR	0,04	1,00
rs6110157	rs6110157	20	14055947	ESF1	flanking_3UTR	0,04	1,00
rs2990505	rs2990505	20	14066276	ESF1	flanking_3UTR	0,04	1,00
rs7273854	rs7273854	20	14114822	ESF1	flanking_3UTR	0,04	1,00
rs11906933	rs11906933	20	14124369	ESF1	intron	0,04	1,00
rs6079319	rs6079319	20	14128212	ESF1	intron	0,04	1,00
rs2224738	rs2224738	20	14155881	ESF1	intron	0,04	1,00
rs994868	rs994868	20	14159442	ESF1	intron	0,04	1,00
[truncated: 5,142 more rows]

## Sheet: Supp Table 4
	Pour enrichissement p<0.05 et FC >1.5	Pour enrichissement p<0.01 et FC >1.5	p-value	q-value	NonRepondeur	Repondeur	FoldChange (log2)	FoldChange	Fold Change sup 2	gene_symbol	gene_symbols	Gene_name	gene_symbol.Pathway	gene_symbol.Gene.Ontology.Biological.Process	gene_symbol.Gene.Ontology.Molecular.Function	gene_symbol.chrNum	gene_symbol.arm	gene_symbol.meanPos
242715_at	1		0.025	0.955	4.3	6.3	-2	0.25	1	---	---	---	---	---	---	19	19q	3.12037e+07
213745_at	1		0.001	0.955	2.9	4.8	-1.9	0.267943	1	ATRNL1	ATRNL1	attractin-like 1	---	0007186 // G-protein coupled receptor protein signaling pathway // inferred from electronic annotation	0005488 // binding // inferred from electronic annotation /// 0005515 // protein binding // inferred from electronic annotation /// 0005529 // sugar binding // inferred from electronic annotation	10	10q	117367446
239340_at	1		0.019	0.955	3.7	5.5	-1.8	0.287175	1	---	---	---	---	---	---	19	19q	31202892
229110_at	1		0.019	0.955	5.7	7.3	-1.7	0.307786	1	SLC24A2	SLC24A2	solute carrier family 24 (sodium/potassium/calcium exchanger). member 2	---	0006810 // transport // inferred from electronic annotation /// 0006811 // ion transport // inferred from electronic annotation /// 0006813 // potassium ion transport // inferred from electronic annotation /// 0006814 // sodium ion transport // inferred from electronic annotation /// 0006816 // calcium ion transport // inferred from electronic annotation /// 0006874 // cellular calcium ion homeos…	0005262 // calcium channel activity // inferred from electronic annotation /// 0015293 // symporter activity // inferred from electronic annotation /// 0015297 // antiporter activity // inferred from electronic annotation /// 0046983 // protein dimerization activity // inferred from electronic annotation	9	9p	19507950
224579_at	1		0.025	0.955	7.1	8.8	-1.7	0.307786	1	SLC38A1	SLC38A1	solute carrier family 38. member 1	---	0006810 // transport // inferred from electronic annotation /// 0006811 // ion transport // inferred from electronic annotation /// 0006814 // sodium ion transport // inferred from electronic annotation /// 0006865 // amino acid transport // not recorded /// 0006865 // amino acid transport // inferred from electronic annotation /// 0006868 // glutamine transport // inferred from electronic annota…	0005283 // sodium:amino acid symporter activity // non-traceable author statement /// 0015171 // amino acid transmembrane transporter activity // not recorded /// 0015175 // neutral amino acid transmembrane transporter activity // non-traceable author statement /// 0015179 // L-amino acid transmembrane transporter activity // not recorded /// 0015186 // L-glutamine transmembrane transporter activ…	12	12q	46579209
205825_at	1		0.037	0.955	5.7	7.5	-1.7	0.307786	1	PCSK1	PCSK1	proprotein convertase subtilisin/kexin type 1	---	0006508 // proteolysis // inferred from electronic annotation /// 0006508 // proteolysis // traceable author statement /// 0007267 // cell-cell signaling // traceable author statement /// 0008152 // metabolic process // traceable author statement /// 0009749 // response to glucose stimulus // inferred from electronic annotation /// 0009790 // embryo development // inferred from electronic annotat…	0004175 // endopeptidase activity // inferred from electronic annotation /// 0004252 // serine-type endopeptidase activity // inferred from sequence or structural similarity /// 0004252 // serine-type endopeptidase activity // inferred from electronic annotation /// 0008233 // peptidase activity // inferred from electronic annotation /// 0008236 // serine-type peptidase activity // inferred from …	5	5q	9.57475e+07
204160_s_at	1		0.006	0.955	5.6	7	-1.5	0.353553	1	ENPP4	ENPP4	ectonucleotide pyrophosphatase/phosphodiesterase 4 (putative)	---	0008152 // metabolic process // inferred from electronic annotation	0003824 // catalytic activity // inferred from electronic annotation /// 0016787 // hydrolase activity // inferred from electronic annotation	6	6p	4.61109e+07
204161_s_at	1		0.007	0.955	4.4	5.9	-1.5	0.353553	1	ENPP4	ENPP4	ectonucleotide pyrophosphatase/phosphodiesterase 4 (putative)	---	0008152 // metabolic process // inferred from electronic annotation	0003824 // catalytic activity // inferred from electronic annotation /// 0016787 // hydrolase activity // inferred from electronic annotation	6	6p	46110782
209392_at	1		0.028	0.955	7.1	8.6	-1.5	0.353553	1	ENPP2	ENPP2	ectonucleotide pyrophosphatase/phosphodiesterase 2	---	0006796 // phosphate metabolic process // traceable author statement /// 0006928 // cellular component movement // traceable author statement /// 0006935 // chemotaxis // non-traceable author statement /// 0006935 // chemotaxis // inferred from electronic annotation /// 0006955 // immune response // inferred from electronic annotation /// 0007186 // G-protein coupled receptor protein signaling pa…	0003676 // nucleic acid binding // inferred from electronic annotation /// 0003824 // catalytic activity // inferred from electronic annotation /// 0004528 // phosphodiesterase I activity // traceable author statement /// 0004551 // nucleotide diphosphatase activity // traceable author statement /// 0005044 // scavenger receptor activity // inferred from electronic annotation /// 0008134 // trans…	8	8q	1.2061e+08
218237_s_at	1		0.032	0.955	6.7	8.1	-1.5	0.353553	1	SLC38A1	SLC38A1	solute carrier family 38. member 1	---	0006810 // transport // inferred from electronic annotation /// 0006811 // ion transport // inferred from electronic annotation /// 0006814 // sodium ion transport // inferred from electronic annotation /// 0006865 // amino acid transport // not recorded /// 0006865 // amino acid transport // inferred from electronic annotation /// 0006868 // glutamine transport // inferred from electronic annota…	0005283 // sodium:amino acid symporter activity // non-traceable author statement /// 0015171 // amino acid transmembrane transporter activity // not recorded /// 0015175 // neutral amino acid transmembrane transporter activity // non-traceable author statement /// 0015179 // L-amino acid transmembrane transporter activity // not recorded /// 0015186 // L-glutamine transmembrane transporter activ…	12	12q	46622186
205751_at	1		0.048	0.955	4.8	6.3	-1.5	0.353553	1	SH3GL2	SH3GL2	SH3-domain GRB2-like 2	---	0006892 // post-Golgi vesicle-mediated transport // not recorded /// 0006897 // endocytosis // inferred from electronic annotation /// 0007165 // signal transduction // traceable author statement /// 0007417 // central nervous system development // traceable author statement /// 0016044 // cellular membrane organization // not recorded /// 0048489 // synaptic vesicle transport // inferred from el…	0005515 // protein binding // inferred from physical interaction /// 0005515 // protein binding // inferred from electronic annotation /// 0008289 // lipid binding // inferred from electronic annotation /// 0042802 // identical protein binding // inferred from physical interaction	9	9p	17687945
206403_at	1		0.012	0.955	3.5	4.9	-1.4	0.378929	1	ZNF536	ZNF536	zinc finger protein 536	---	0006350 // transcription // inferred from electronic annotation /// 0045449 // regulation of transcription // inferred from electronic annotation	0003676 // nucleic acid binding // inferred from electronic annotation /// 0003677 // DNA binding // inferred from electronic annotation /// 0008270 // zinc ion binding // inferred from electronic annotation /// 0046872 // metal ion binding // inferred from electronic annotation	19	19q	30956146
204723_at	1		0.02	0.955	4	5.3	-1.4	0.378929	1	SCN3B	SCN3B	sodium channel. voltage-gated. type III. beta	---	0006810 // transport // inferred from electronic annotation /// 0006811 // ion transport // inferred from electronic annotation /// 0006814 // sodium ion transport // non-traceable author statement /// 0006814 // sodium ion transport // inferred from electronic annotation	0005216 // ion channel activity // inferred from electronic annotation /// 0005244 // voltage-gated ion channel activity // inferred from electronic annotation /// 0005248 // voltage-gated sodium channel activity // non-traceable author statement /// 0005272 // sodium channel activity // inferred from electronic annotation	11	11q	123512603
244455_at	1		0.02	0.955	5.6	7	-1.4	0.378929	1	KCNT2	KCNT2	potassium channel. subfamily T. member 2	---	0006810 // transport // inferred from electronic annotation /// 0006811 // ion transport // inferred from electronic annotation /// 0006813 // potassium ion transport // inferred from electronic annotation /// 0008152 // metabolic process // inferred from electronic annotation	0000166 // nucleotide binding // inferred from electronic annotation /// 0003824 // catalytic activity // inferred from electronic annotation /// 0005216 // ion channel activity // inferred from electronic annotation /// 0005267 // potassium channel activity // inferred from electronic annotation /// 0005488 // binding // inferred from electronic annotation /// 0005524 // ATP binding // inferred …	1	1q	1.96195e+08
229313_at	1		0.028	0.955	4.4	5.8	-1.4	0.378929	1	ANO5	ANO5	anoctamin 5	---	0006810 // transport // inferred from electronic annotation /// 0006811 // ion transport // inferred from electronic annotation	0005216 // ion channel activity // inferred from electronic annotation /// 0005254 // chloride channel activity // inferred from electronic annotation	11	11p	2.23046e+07
203498_at	1		0.029	0.955	6.1	7.5	-1.4	0.378929	1	RCAN2	RCAN2	regulator of calcineurin 2	---	0007417 // central nervous system development // non-traceable author statement /// 0019722 // calcium-mediated signaling // inferred from electronic annotation	0000166 // nucleotide binding // inferred from electronic annotation /// 0030346 // protein phosphatase 2B binding // non-traceable author statement	6	6p	4.62409e+07
230231_at	1		0.03	0.955	4.2	5.6	-1.4	0.378929	1	FGF14	FGF14	fibroblast growth factor 14	---	0007165 // signal transduction // traceable author statement /// 0007254 // JNK cascade // inferred from physical interaction /// 0007267 // cell-cell signaling // traceable author statement /// 0007399 // nervous system development // traceable author statement /// 0008219 // cell death // inferred from electronic annotation /// 0008543 // fibroblast growth factor receptor signaling pathway // i…	0005104 // fibroblast growth factor receptor binding // inferred from direct assay /// 0008083 // growth factor activity // inferred from electronic annotation /// 0008083 // growth factor activity // traceable author statement /// 0008201 // heparin binding // inferred from direct assay	13	13q	102373568
210839_s_at	1		0.035	0.955	5.7	7.1	-1.4	0.378929	1	ENPP2	ENPP2	ectonucleotide pyrophosphatase/phosphodiesterase 2	---	0006796 // phosphate metabolic process // traceable author statement /// 0006928 // cellular component movement // traceable author statement /// 0006935 // chemotaxis // non-traceable author statement /// 0006935 // chemotaxis // inferred from electronic annotation /// 0006955 // immune response // inferred from electronic annotation /// 0007186 // G-protein coupled receptor protein signaling pa…	0003676 // nucleic acid binding // inferred from electronic annotation /// 0003824 // catalytic activity // inferred from electronic annotation /// 0004528 // phosphodiesterase I activity // traceable author statement /// 0004551 // nucleotide diphosphatase activity // traceable author statement /// 0005044 // scavenger receptor activity // inferred from electronic annotation /// 0008134 // trans…	8	8q	1.2061e+08
236088_at	1		0.002	0.955	5	6.3	-1.3	0.406126	1	NTNG1	NTNG1	netrin G1	---	0007275 // multicellular organismal development // inferred from electronic annotation /// 0007399 // nervous system development // inferred from electronic annotation /// 0007409 // axonogenesis // inferred from sequence or structural similarity /// 0007409 // axonogenesis // inferred from electronic annotation /// 0030154 // cell differentiation // inferred from electronic annotation	0005515 // protein binding // inferred from physical interaction	1	1p	1.08024e+08
238133_at	1		0.009	0.955	4.3	5.6	-1.3	0.406126	1	---	---	---	---	---	---	1	1p	1.07683e+08
228608_at	1		0.018	0.955	5	6.4	-1.3	0.406126	1	NALCN	NALCN	sodium leak channel. non-selective	---	0006810 // transport // inferred from electronic annotation /// 0006811 // ion transport // inferred from electronic annotation /// 0006814 // sodium ion transport // inferred from electronic annotation /// 0055085 // transmembrane transport // inferred from electronic annotation	0005216 // ion channel activity // inferred from electronic annotation /// 0005244 // voltage-gated ion channel activity // inferred from electronic annotation /// 0005272 // sodium channel activity // inferred from electronic annotation	13	13q	101710302
229288_at	1		0.025	0.955	3.8	5.1	-1.3	0.406126	1	EPHA7	EPHA7	EPH receptor A7	---	0006468 // protein phosphorylation // inferred from electronic annotation /// 0007169 // transmembrane receptor protein tyrosine kinase signaling pathway // inferred from electronic annotation /// 0016310 // phosphorylation // inferred from sequence or structural similarity /// 0016310 // phosphorylation // inferred from electronic annotation /// 0031290 // retinal ganglion cell axon guidance // …	0000166 // nucleotide binding // inferred from electronic annotation /// 0004672 // protein kinase activity // inferred from electronic annotation /// 0004713 // protein tyrosine kinase activity // inferred from sequence or structural similarity /// 0004713 // protein tyrosine kinase activity // inferred from electronic annotation /// 0004714 // transmembrane receptor protein tyrosine kinase acti…	6	6q	9.39501e+07
221310_at	1		0.032	0.955	4.6	5.9	-1.3	0.406126	1	FGF14	FGF14	fibroblast growth factor 14	---	0007165 // signal transduction // traceable author statement /// 0007254 // JNK cascade // inferred from physical interaction /// 0007267 // cell-cell signaling // traceable author statement /// 0007399 // nervous system development // traceable author statement /// 0008219 // cell death // inferred from electronic annotation /// 0008543 // fibroblast growth factor receptor signaling pathway // i…	0005104 // fibroblast growth factor receptor binding // inferred from direct assay /// 0008083 // growth factor activity // inferred from electronic annotation /// 0008083 // growth factor activity // traceable author statement /// 0008201 // heparin binding // inferred from direct assay	13	13q	1.02472e+08
209755_at	1		0.036	0.955	4.6	5.9	-1.3	0.406126	1	NMNAT2	NMNAT2	nicotinamide nucleotide adenylyltransferase 2	---	0009058 // biosynthetic process // inferred from electronic annotation /// 0009435 // NAD biosynthetic process // inferred by curator /// 0009435 // NAD biosynthetic process // inferred from electronic annotation /// 0019363 // pyridine nucleotide biosynthetic process // inferred from electronic annotation /// 0019674 // NAD metabolic process // not recorded	0000166 // nucleotide binding // inferred from electronic annotation /// 0000309 // nicotinamide-nucleotide adenylyltransferase activity // inferred from electronic annotation /// 0004515 // nicotinate-nucleotide adenylyltransferase activity // inferred from direct assay /// 0004515 // nicotinate-nucleotide adenylyltransferase activity // inferred from electronic annotation /// 0005524 // ATP bin…	1	1q	1.83303e+08
243357_at	1		0.044	0.955	3.5	4.7	-1.3	0.406126	1	NEGR1	NEGR1	neuronal growth regulator 1	---	0007155 // cell adhesion // inferred from electronic annotation	---	1	1p	7.18706e+07
243163_at	1		0.044	0.955	2.3	3.6	-1.3	0.406126	1	---	---	---	---	---	---	7	7p	43605377
203680_at	1		0.002	0.955	7.1	8.2	-1.2	0.435275	1	PRKAR2B	PRKAR2B	protein kinase. cAMP-dependent. regulatory. type II. beta	Calcium_regulation_in_cardiac_cells // GenMAPP /// G_Protein_Signaling // GenMAPP /// Smooth_muscle_contraction // GenMAPP	0001932 // regulation of protein phosphorylation // inferred from electronic annotation /// 0006631 // fatty acid metabolic process // inferred from electronic annotation /// 0007165 // signal transduction // inferred from electronic annotation /// 0007612 // learning // inferred from electronic annotation /// 0009755 // hormone-mediated signaling pathway // not recorded /// 0023034 // intracellu…	0000166 // nucleotide binding // inferred from electronic annotation /// 0008603 // cAMP-dependent protein kinase regulator activity // inferred from electronic annotation /// 0008603 // cAMP-dependent protein kinase regulator activity // traceable author statement /// 0016301 // kinase activity // inferred from electronic annotation /// 0019904 // protein domain specific binding // inferred from…	7	7q	1.06744e+08
202178_at	1		0.012	0.955	5.3	6.5	-1.2	0.435275	1	PRKCZ	PRKCZ	protein kinase C. zeta	Calcium_regulation_in_cardiac_cells // GenMAPP /// G_Protein_Signaling // GenMAPP /// Smooth_muscle_contraction // GenMAPP /// Wnt_signaling // GenMAPP	0000226 // microtubule cytoskeleton organization // inferred from electronic annotation /// 0001954 // positive regulation of cell-matrix adhesion // inferred from electronic annotation /// 0006468 // protein phosphorylation // inferred from electronic annotation /// 0006916 // anti-apoptosis // traceable author statement /// 0007165 // signal transduction // inferred from electronic annotation /…	0000166 // nucleotide binding // inferred from electronic annotation /// 0004672 // protein kinase activity // inferred from electronic annotation /// 0004674 // protein serine/threonine kinase activity // inferred from direct assay /// 0004674 // protein serine/threonine kinase activity // inferred from electronic annotation /// 0004697 // protein kinase C activity // inferred from electronic an…	1	1p	2.04945e+06
228494_at	1		0.016	0.955	6.5	7.7	-1.2	0.435275	1	PPP1R9A	PPP1R9A	protein phosphatase 1. regulatory (inhibitor) subunit 9A	---	0007015 // actin filament organization // inferred from electronic annotation /// 0007275 // multicellular organismal development // inferred from electronic annotation /// 0007399 // nervous system development // inferred from electronic annotation /// 0030154 // cell differentiation // inferred from electronic annotation /// 0031175 // neuron projection development // inferred from electronic a…	0003779 // actin binding // inferred from electronic annotation /// 0005515 // protein binding // inferred from electronic annotation	7	7q	9.49252e+07
238533_at	1		0.017	0.955	2.5	3.7	-1.2	0.435275	1	EPHA7	EPHA7	EPH receptor A7	---	0006468 // protein phosphorylation // inferred from electronic annotation /// 0007169 // transmembrane receptor protein tyrosine kinase signaling pathway // inferred from electronic annotation /// 0016310 // phosphorylation // inferred from sequence or structural similarity /// 0016310 // phosphorylation // inferred from electronic annotation /// 0031290 // retinal ganglion cell axon guidance // …	0000166 // nucleotide binding // inferred from electronic annotation /// 0004672 // protein kinase activity // inferred from electronic annotation /// 0004713 // protein tyrosine kinase activity // inferred from sequence or structural similarity /// 0004713 // protein tyrosine kinase activity // inferred from electronic annotation /// 0004714 // transmembrane receptor protein tyrosine kinase acti…	6	6q	9.3951e+07
225299_at	1		0.028	0.955	4.5	5.7	-1.2	0.435275	1	MYO5B	MYO5B	myosin VB	Fatty_Acid_Degradation // GenMAPP /// Fatty_Acid_Synthesis // GenMAPP	0006810 // transport // inferred from electronic annotation /// 0015031 // protein transport // inferred from electronic annotation /// 0032880 // regulation of protein localization // inferred from electronic annotation	0000166 // nucleotide binding // inferred from electronic annotation /// 0003774 // motor activity // inferred from electronic annotation /// 0003779 // actin binding // inferred from electronic annotation /// 0005515 // protein binding // inferred from electronic annotation /// 0005516 // calmodulin binding // inferred from electronic annotation /// 0005524 // ATP binding // inferred from electr…	18	18q	47406426
214217_at	1		0.028	0.955	3.1	4.3	-1.2	0.435275	1	GRM5	GRM5	glutamate receptor. metabotropic 5	GPCRDB_Class_C_Metabotropic_glutamate_pheromone // GenMAPP	0007165 // signal transduction // inferred from electronic annotation /// 0007186 // G-protein coupled receptor protein signaling pathway // inferred from electronic annotation /// 0007206 // activation of phospholipase C activity by metabotropic glutamate receptor signaling pathway // traceable author statement /// 0007268 // synaptic transmission // traceable author statement	0004871 // signal transducer activity // inferred from electronic annotation /// 0004872 // receptor activity // inferred from electronic annotation /// 0004930 // G-protein coupled receptor activity // traceable author statement /// 0004930 // G-protein coupled receptor activity // inferred from electronic annotation /// 0008066 // glutamate receptor activity // traceable author statement	11	11q	8.82386e+07
204722_at	1		0.03	0.955	5.1	6.2	-1.2	0.435275	1	SCN3B	SCN3B	sodium channel. voltage-gated. type III. beta	---	0006810 // transport // inferred from electronic annotation /// 0006811 // ion transport // inferred from electronic annotation /// 0006814 // sodium ion transport // non-traceable author statement /// 0006814 // sodium ion transport // inferred from electronic annotation	0005216 // ion channel activity // inferred from electronic annotation /// 0005244 // voltage-gated ion channel activity // inferred from electronic annotation /// 0005248 // voltage-gated sodium channel activity // non-traceable author statement /// 0005272 // sodium channel activity // inferred from electronic annotation	11	11q	123512603
205637_s_at	1		0.031	0.955	4.6	5.7	-1.2	0.435275	1	SH3GL3	SH3GL3	SH3-domain GRB2-like 3	---	0006897 // endocytosis // inferred from electronic annotation /// 0007165 // signal transduction // traceable author statement /// 0007417 // central nervous system development // traceable author statement	0005515 // protein binding // inferred from physical interaction /// 0005515 // protein binding // inferred from electronic annotation /// 0008289 // lipid binding // inferred from electronic annotation /// 0042802 // identical protein binding // inferred from physical interaction	15	15q	84201888
240236_at	1		0.039	0.955	3.8	5	-1.2	0.435275	1	STXBP5L	STXBP5L	syntaxin binding protein 5-like	---	0006810 // transport // inferred from electronic annotation /// 0006887 // exocytosis // inferred from electronic annotation /// 0015031 // protein transport // inferred from electronic annotation /// 0016192 // vesicle-mediated transport // inferred from electronic annotation	---	3	3q	121143432
231986_at	1		0.015	0.955	4.3	5.4	-1.1	0.466516	1	RIMS1	RIMS1	regulating synaptic membrane exocytosis 1	---	0006461 // protein complex assembly // inferred from direct assay /// 0006810 // transport // inferred from electronic annotation /// 0006836 // neurotransmitter transport // inferred from electronic annotation /// 0006886 // intracellular protein transport // inferred from electronic annotation /// 0006887 // exocytosis // inferred from electronic annotation /// 0006944 // cellular membrane fusi…	0005083 // small GTPase regulator activity // traceable author statement /// 0005515 // protein binding // inferred from physical interaction /// 0005515 // protein binding // inferred from electronic annotation /// 0008270 // zinc ion binding // inferred from electronic annotation /// 0017137 // Rab GTPase binding // inferred from electronic annotation /// 0046872 // metal ion binding // inferre…	6	6q	7.30571e+07
1557481_a_at	1		0.016	0.955	3	4.1	-1.1	0.466516	1	C21orf131	C21orf131	chromosome 21 open reading frame 131	---	---	---	21	21q	2.21453e+07
236734_at	1		0.024	0.955	2.4	3.6	-1.1	0.466516	1	SLITRK1	SLITRK1	SLIT and NTRK-like family. member 1	---	0007409 // axonogenesis // inferred from electronic annotation	0005515 // protein binding // inferred from electronic annotation	13	13q	8.44516e+07
213558_at	1		0.025	0.955	3.9	5	-1.1	0.466516	1	PCLO	PCLO	piccolo (presynaptic cytomatrix protein)	---	0006810 // transport // inferred from electronic annotation /// 0007010 // cytoskeleton organization // inferred from sequence or structural similarity /// 0007010 // cytoskeleton organization // inferred from electronic annotation /// 0016079 // synaptic vesicle exocytosis // non-traceable author statement /// 0017157 // regulation of exocytosis // inferred from electronic annotation /// 0019933…	0005215 // transporter activity // inferred from electronic annotation /// 0005509 // calcium ion binding // inferred from sequence or structural similarity /// 0005515 // protein binding // inferred from electronic annotation /// 0005522 // profilin binding // inferred from sequence or structural similarity /// 0005522 // profilin binding // inferred from electronic annotation /// 0005544 // cal…	7	7q	8.2498e+07
205348_s_at	1		0.04	0.955	5.6	6.7	-1.1	0.466516	1	DYNC1I1	DYNC1I1	dynein. cytoplasmic 1. intermediate chain 1	---	0006810 // transport // inferred from electronic annotation /// 0047496 // vesicle transport along microtubule // inferred from sequence or structural similarity /// 0047496 // vesicle transport along microtubule // inferred from electronic annotation	0003774 // motor activity // traceable author statement /// 0003774 // motor activity // inferred from electronic annotation /// 0003777 // microtubule motor activity // inferred from sequence or structural similarity /// 0003777 // microtubule motor activity // inferred from electronic annotation /// 0005515 // protein binding // inferred from physical interaction /// 0005515 // protein binding …	7	7q	9.55648e+07
221217_s_at	1		0.044	0.955	4.1	5.2	-1.1	0.466516	1	RBFOX1	RBFOX1	RNA binding protein. fox-1 homolog (C. elegans) 1	---	0006397 // mRNA processing // inferred from electronic annotation /// 0008380 // RNA splicing // inferred from electronic annotation /// 0050658 // RNA transport // non-traceable author statement	0000166 // nucleotide binding // inferred from electronic annotation /// 0003676 // nucleic acid binding // inferred from electronic annotation /// 0003723 // RNA binding // non-traceable author statement /// 0003723 // RNA binding // inferred from electronic annotation /// 0005515 // protein binding // inferred from physical interaction /// 0008022 // protein C-terminus binding // inferred from …	16	16p	6.91499e+06
240292_x_at	1		0.049	0.955	2.5	3.6	-1.1	0.466516	1	ANKS1B	ANKS1B	ankyrin repeat and sterile alpha motif domain containing 1B	---	---	---	12	12q	99138019
204073_s_at	1		0.049	0.955	4.5	5.6	-1.1	0.466516	1	C11orf9	C11orf9	chromosome 11 open reading frame 9	---	0006350 // transcription // inferred from electronic annotation /// 0014003 // oligodendrocyte development // inferred from sequence or structural similarity /// 0014003 // oligodendrocyte development // inferred from electronic annotation /// 0022010 // central nervous system myelination // inferred from sequence or structural similarity /// 0022010 // central nervous system myelination // infer…	0003677 // DNA binding // inferred from electronic annotation /// 0003700 // sequence-specific DNA binding transcription factor activity // inferred from electronic annotation	11	11q	6.15394e+07
221802_s_at	1		0.008	0.955	6.9	8	-1	0.5	1	KIAA1598	KIAA1598	KIAA1598	---	0007275 // multicellular organismal development // inferred from electronic annotation /// 0007409 // axonogenesis // inferred from electronic annotation	---	10	10q	118704601
213921_at	1		0.01	0.955	3.4	4.4	-1	0.5	1	SST	SST	somatostatin	---	0001101 // response to acid // inferred from electronic annotation /// 0006972 // hyperosmotic response // inferred from electronic annotation /// 0007166 // cell surface receptor linked signaling pathway // traceable author statement /// 0007186 // G-protein coupled receptor protein signaling pathway // traceable author statement /// 0007267 // cell-cell signaling // traceable author statement /…	0005179 // hormone activity // traceable author statement /// 0005179 // hormone activity // inferred from electronic annotation	3	3q	1.87387e+08
1553422_s_at	1		0.019	0.955	3.5	4.5	-1	0.5	1	RBFOX1	RBFOX1	RNA binding protein. fox-1 homolog (C. elegans) 1	---	0006397 // mRNA processing // inferred from electronic annotation /// 0008380 // RNA splicing // inferred from electronic annotation /// 0050658 // RNA transport // non-traceable author statement	0000166 // nucleotide binding // inferred from electronic annotation /// 0003676 // nucleic acid binding // inferred from electronic annotation /// 0003723 // RNA binding // non-traceable author statement /// 0003723 // RNA binding // inferred from electronic annotation /// 0005515 // protein binding // inferred from physical interaction /// 0008022 // protein C-terminus binding // inferred from …	16	16p	7.57262e+06
227154_at	1		0.021	0.955	5	6	-1	0.5	1	IGSF21	IGSF21	immunoglobin superfamily. member 21	---	---	---	1	1p	18569610
1556641_at	1		0.033	0.955	3.5	4.5	-1	0.5	1	SLC7A14	SLC7A14	solute carrier family 7 (cationic amino acid transporter. y+ system). member 14	---	0006810 // transport // inferred from electronic annotation /// 0006865 // amino acid transport // inferred from electronic annotation /// 0055085 // transmembrane transport // inferred from electronic annotation	0015171 // amino acid transmembrane transporter activity // inferred from electronic annotation	3	3q	170178794
1553194_at	1		0.04	0.955	2.5	3.5	-1	0.5	1	NEGR1	NEGR1	neuronal growth regulator 1	---	0007155 // cell adhesion // inferred from electronic annotation	---	1	1p	7.231e+07
1559283_a_at	1		0.043	0.955	2.9	3.9	-1	0.5	1	CNPY1	CNPY1	canopy 1 homolog (zebrafish)	---	---	---	7	7q	1.5531e+08
205934_at	1		0.048	0.955	4	5	-1	0.5	1	PLCL1	PLCL1	phospholipase C-like 1	---	0006629 // lipid metabolic process // inferred from electronic annotation /// 0007165 // signal transduction // inferred from electronic annotation /// 0007610 // behavior // inferred from electronic annotation /// 0023034 // intracellular signaling pathway // traceable author statement	0004435 // phosphoinositide phospholipase C activity // inferred from electronic annotation /// 0004629 // phospholipase C activity // traceable author statement /// 0004629 // phospholipase C activity // inferred from electronic annotation /// 0004871 // signal transducer activity // inferred from electronic annotation /// 0005509 // calcium ion binding // inferred from electronic annotation ///…	2	2q	198980763
244008_at	1		0.013	0.955	5.1	5.9	-0.9	0.535887		PARP8	PARP8	poly (ADP-ribose) polymerase family. member 8	---	---	0000166 // nucleotide binding // inferred from electronic annotation /// 0003950 // NAD+ ADP-ribosyltransferase activity // inferred from electronic annotation /// 0005524 // ATP binding // inferred from electronic annotation /// 0016740 // transferase activity // inferred from electronic annotation /// 0016757 // transferase activity. transferring glycosyl groups // inferred from electronic anno…	5	5q	50142074
230026_at	1		0.013	0.955	4.8	5.6	-0.9	0.535887		MRPL43	MRPL43	mitochondrial ribosomal protein L43	---	0006412 // translation // non-traceable author statement	0003735 // structural constituent of ribosome // non-traceable author statement /// 0005515 // protein binding // inferred from physical interaction /// 0045182 // translation regulator activity // non-traceable author statement	10	10q	1.02744e+08
210414_at	1		0.014	0.955	4.6	5.5	-0.9	0.535887		FLRT1	FLRT1	fibronectin leucine rich transmembrane protein 1	---	0007155 // cell adhesion // inferred from electronic annotation	0005057 // receptor signaling protein activity // non-traceable author statement /// 0005515 // protein binding // inferred from electronic annotation /// 0030674 // protein binding. bridging // non-traceable author statement	11	11q	63885069
229550_at	1		0.018	0.955	4.3	5.2	-0.9	0.535887		KIAA1409	KIAA1409	KIAA1409	---	---	---	14	14q	94118729
236038_at	1		0.022	0.955	5	5.9	-0.9	0.535887		---	---	---	---	---	---	4	4q	141781184
227657_at	1		0.022	0.955	4.9	5.8	-0.9	0.535887		RNF150	RNF150	ring finger protein 150	---	---	0005515 // protein binding // inferred from electronic annotation /// 0008270 // zinc ion binding // inferred from electronic annotation /// 0046872 // metal ion binding // inferred from electronic annotation	4	4q	141920670
1558295_a_at	1		0.023	0.955	3.4	4.3	-0.9	0.535887		PPFIA2	PPFIA2	protein tyrosine phosphatase. receptor type. f polypeptide (PTPRF). interacting protein (liprin). alpha 2	---	0007160 // cell-matrix adhesion // traceable author statement	0005515 // protein binding // inferred from physical interaction /// 0005515 // protein binding // inferred from electronic annotation	12	12q	81652660
238029_s_at	1		0.025	0.955	6.8	7.7	-0.9	0.535887		SLC16A14	SLC16A14	solute carrier family 16. member 14 (monocarboxylic acid transporter 14)	---	0006810 // transport // inferred from electronic annotation /// 0055085 // transmembrane transport // inferred from electronic annotation	0015293 // symporter activity // inferred from electronic annotation	2	2q	2.309e+08
204681_s_at	1		0.025	0.955	6.9	7.8	-0.9	0.535887		RAPGEF5	RAPGEF5	Rap guanine nucleotide exchange factor (GEF) 5	---	0007264 // small GTPase mediated signal transduction // non-traceable author statement /// 0007264 // small GTPase mediated signal transduction // inferred from electronic annotation /// 0007399 // nervous system development // non-traceable author statement /// 0051056 // regulation of small GTPase mediated signal transduction // inferred from electronic annotation	0005085 // guanyl-nucleotide exchange factor activity // inferred from electronic annotation /// 0005088 // Ras guanyl-nucleotide exchange factor activity // traceable author statement /// 0017034 // Rap guanyl-nucleotide exchange factor activity // inferred from direct assay /// 0030742 // GTP-dependent protein binding // inferred from physical interaction	7	7p	2.21956e+07
230849_at	1		0.028	0.955	3.2	4.2	-0.9	0.535887		KCNA1	KCNA1	potassium voltage-gated channel. shaker-related subfamily. member 1 (episodic ataxia with myokymia)	---	0006810 // transport // inferred from electronic annotation /// 0006811 // ion transport // inferred from electronic annotation /// 0006813 // potassium ion transport // inferred from electronic annotation /// 0006813 // potassium ion transport // traceable author statement /// 0007268 // synaptic transmission // traceable author statement /// 0055085 // transmembrane transport // inferred from e…	0005216 // ion channel activity // inferred from electronic annotation /// 0005244 // voltage-gated ion channel activity // inferred from electronic annotation /// 0005249 // voltage-gated potassium channel activity // inferred from electronic annotation /// 0005251 // delayed rectifier potassium channel activity // inferred from electronic annotation /// 0005251 // delayed rectifier potassium ch…	12	12p	5023473
230003_at	1		0.031	0.955	3.7	4.6	-0.9	0.535887		---	---	---	---	---	---	12	12q	6.01833e+07
229233_at	1		0.044	0.955	3.7	4.5	-0.9	0.535887		NRG3	NRG3	neuregulin 3	---	0001558 // regulation of cell growth // non-traceable author statement /// 0007243 // intracellular protein kinase cascade // inferred from electronic annotation /// 0007389 // pattern specification process // inferred from electronic annotation /// 0009790 // embryo development // inferred from electronic annotation /// 0030879 // mammary gland development // inferred from electronic annotation …	0005102 // receptor binding // inferred from electronic annotation /// 0005515 // protein binding // inferred from electronic annotation /// 0008083 // growth factor activity // non-traceable author statement /// 0008083 // growth factor activity // inferred from electronic annotation /// 0030297 // transmembrane receptor protein tyrosine kinase activator activity // non-traceable author statemen…	10	10q	8.4746e+07
238815_at	1		0.045	0.955	3.7	4.6	-0.9	0.535887		LRRTM1	LRRTM1	leucine rich repeat transmembrane neuronal 1	---	---	0005515 // protein binding // inferred from electronic annotation	2	2p	80529249
206331_at	1		0.049	0.955	5.7	6.6	-0.9	0.535887		CALCRL	CALCRL	calcitonin receptor-like	GPCRDB_Class_B_Secretin-like // GenMAPP	0006937 // regulation of muscle contraction // inferred from electronic annotation /// 0007165 // signal transduction // inferred from electronic annotation /// 0007166 // cell surface receptor linked signaling pathway // inferred from electronic annotation /// 0007186 // G-protein coupled receptor protein signaling pathway // inferred from electronic annotation /// 0007187 // G-protein signaling…	0001635 // calcitonin gene-related polypeptide receptor activity // inferred from electronic annotation /// 0004871 // signal transducer activity // inferred from electronic annotation /// 0004872 // receptor activity // inferred from electronic annotation /// 0004888 // transmembrane receptor activity // inferred from electronic annotation /// 0004930 // G-protein coupled receptor activity // tr…	2	2q	1.88261e+08
211339_s_at	1		0.05	0.955	3.5	4.4	-0.9	0.535887		ITK	ITK	IL2-inducible T-cell kinase	---	0006468 // protein phosphorylation // inferred from electronic annotation /// 0006968 // cellular defense response // traceable author statement /// 0007165 // signal transduction // traceable author statement /// 0023034 // intracellular signaling pathway // inferred from electronic annotation	0000166 // nucleotide binding // inferred from electronic annotation /// 0004672 // protein kinase activity // inferred from electronic annotation /// 0004713 // protein tyrosine kinase activity // inferred from electronic annotation /// 0004715 // non-membrane spanning protein tyrosine kinase activity // inferred from electronic annotation /// 0004715 // non-membrane spanning protein tyrosine ki…	5	5q	1.56645e+08
219225_at	1		0.003	0.955	5.9	6.7	-0.8	0.574349		PGBD5	PGBD5	piggyBac transposable element derived 5	---	---	---	1	1q	2.30463e+08
221648_s_at	1		0.011	0.955	3	3.8	-0.8	0.574349		LOC100507192	LOC100507192	hypothetical LOC100507192	---	---	---	1	1q	244843496
242420_at	1		0.012	0.955	3.9	4.7	-0.8	0.574349		---	---	---	---	---	---	7	7q	9.49238e+07
232081_at	1		0.012	0.955	4	4.8	-0.8	0.574349		---	---	---	---	---	---	21	21q	4.37199e+07
224482_s_at	1		0.017	0.955	3.5	4.3	-0.8	0.574349		RAB11FIP4	RAB11FIP4	RAB11 family interacting protein 4 (class II)	---	0000910 // cytokinesis // inferred from mutant phenotype /// 0006810 // transport // inferred from electronic annotation /// 0015031 // protein transport // inferred from electronic annotation /// 0044419 // interspecies interaction between organisms // inferred from electronic annotation	0005509 // calcium ion binding // inferred from electronic annotation /// 0005515 // protein binding // inferred from physical interaction /// 0017137 // Rab GTPase binding // inferred from physical interaction /// 0030306 // ADP-ribosylation factor binding // inferred from physical interaction /// 0042803 // protein homodimerization activity // inferred from direct assay	17	17q	29864851
227641_at	1		0.02	0.955	7.3	8	-0.8	0.574349		FBXL16	FBXL16	F-box and leucine-rich repeat protein 16	---	---	0005515 // protein binding // inferred from electronic annotation	16	16p	742812
223541_at	1		0.021	0.955	4.3	5.1	-0.8	0.574349		HAS3	HAS3	hyaluronan synthase 3	---	0005975 // carbohydrate metabolic process // traceable author statement	0016740 // transferase activity // inferred from electronic annotation /// 0016757 // transferase activity. transferring glycosyl groups // inferred from electronic annotation /// 0016758 // transferase activity. transferring hexosyl groups // inferred from electronic annotation /// 0050501 // hyaluronan synthase activity // inferred from electronic annotation	16	16q	6.91474e+07
236835_at	1		0.021	0.955	2.6	3.3	-0.8	0.574349		LOC645431	LOC645431	hypothetical LOC645431	---	---	---	14	14q	65878106
213332_at	1		0.022	0.955	3.7	4.4	-0.8	0.574349		PAPPA2	PAPPA2	pappalysin 2	---	0001558 // regulation of cell growth // non-traceable author statement /// 0006508 // proteolysis // inferred from direct assay /// 0030154 // cell differentiation // inferred from electronic annotation	0008233 // peptidase activity // inferred from electronic annotation /// 0008237 // metallopeptidase activity // inferred from direct assay /// 0008237 // metallopeptidase activity // inferred from electronic annotation /// 0008270 // zinc ion binding // non-traceable author statement /// 0016787 // hydrolase activity // inferred from electronic annotation /// 0046872 // metal ion binding // infe…	1	1q	1.76787e+08
213808_at	1		0.024	0.955	5.9	6.7	-0.8	0.574349		ADAM23	ADAM23	ADAM metallopeptidase domain 23	---	0006508 // proteolysis // inferred from electronic annotation /// 0007155 // cell adhesion // inferred from electronic annotation /// 0007229 // integrin-mediated signaling pathway // inferred from electronic annotation /// 0007417 // central nervous system development // traceable author statement	0004222 // metalloendopeptidase activity // inferred from electronic annotation /// 0005178 // integrin binding // traceable author statement /// 0008233 // peptidase activity // inferred from electronic annotation /// 0008237 // metallopeptidase activity // traceable author statement /// 0008237 // metallopeptidase activity // inferred from electronic annotation /// 0008270 // zinc ion binding /…	2	2q	2.07485e+08
212956_at	1		0.027	0.955	6.9	7.7	-0.8	0.574349		TBC1D9	TBC1D9	TBC1 domain family. member 9 (with GRAM domain)	---	0032313 // regulation of Rab GTPase activity // inferred from electronic annotation	0005096 // GTPase activator activity // inferred from electronic annotation /// 0005097 // Rab GTPase activator activity // inferred from electronic annotation /// 0005509 // calcium ion binding // inferred from electronic annotation	4	4q	1.41567e+08
230351_at	1		0.027	0.955	4.4	5.2	-0.8	0.574349		LOC283481	LOC283481	hypothetical LOC283481	---	---	---	13	13q	1.03048e+08
216086_at	1		0.032	0.955	3.2	4	-0.8	0.574349		SV2C	SV2C	synaptic vesicle glycoprotein 2C	---	0006810 // transport // inferred from electronic annotation /// 0006836 // neurotransmitter transport // inferred from electronic annotation /// 0055085 // transmembrane transport // inferred from electronic annotation	0005215 // transporter activity // inferred from electronic annotation	5	5q	75565724
219528_s_at	1		0.033	0.955	3	3.8	-0.8	0.574349		BCL11B	BCL11B	B-cell CLL/lymphoma 11B (zinc finger protein)	---	0006350 // transcription // inferred from electronic annotation /// 0007409 // axonogenesis // inferred from electronic annotation /// 0008285 // negative regulation of cell proliferation // inferred from electronic annotation /// 0009791 // post-embryonic development // inferred from electronic annotation /// 0021953 // central nervous system neuron differentiation // inferred from electronic an…	0003676 // nucleic acid binding // inferred from electronic annotation /// 0008270 // zinc ion binding // inferred from electronic annotation /// 0046872 // metal ion binding // inferred from electronic annotation	14	14q	9.96867e+07
220076_at	1		0.034	0.955	3.5	4.3	-0.8	0.574349		ANKH	ANKH	ankylosis. progressive homolog (mouse)	---	0001501 // skeletal system development // non-traceable author statement /// 0006810 // transport // inferred from electronic annotation /// 0006817 // phosphate transport // inferred from electronic annotation /// 0007626 // locomotory behavior // non-traceable author statement /// 0030500 // regulation of bone mineralization // inferred from sequence or structural similarity /// 0030500 // regu…	0005315 // inorganic phosphate transmembrane transporter activity // inferred from direct assay /// 0015114 // phosphate transmembrane transporter activity // inferred from electronic annotation /// 0030504 // inorganic diphosphate transmembrane transporter activity // inferred from direct assay /// 0030504 // inorganic diphosphate transmembrane transporter activity // inferred from electronic an…	5	5p	1.47883e+07
235070_at	1		0.035	0.955	4.6	5.4	-0.8	0.574349		RBFOX1	RBFOX1	RNA binding protein. fox-1 homolog (C. elegans) 1	---	0006397 // mRNA processing // inferred from electronic annotation /// 0008380 // RNA splicing // inferred from electronic annotation /// 0050658 // RNA transport // non-traceable author statement	0000166 // nucleotide binding // inferred from electronic annotation /// 0003676 // nucleic acid binding // inferred from electronic annotation /// 0003723 // RNA binding // non-traceable author statement /// 0003723 // RNA binding // inferred from electronic annotation /// 0005515 // protein binding // inferred from physical interaction /// 0008022 // protein C-terminus binding // inferred from …	16	16p	7.76222e+06
223093_at	1		0.036	0.955	5.7	6.5	-0.8	0.574349		ANKH	ANKH	ankylosis. progressive homolog (mouse)	---	0001501 // skeletal system development // non-traceable author statement /// 0006810 // transport // inferred from electronic annotation /// 0006817 // phosphate transport // inferred from electronic annotation /// 0007626 // locomotory behavior // non-traceable author statement /// 0030500 // regulation of bone mineralization // inferred from sequence or structural similarity /// 0030500 // regu…	0005315 // inorganic phosphate transmembrane transporter activity // inferred from direct assay /// 0015114 // phosphate transmembrane transporter activity // inferred from electronic annotation /// 0030504 // inorganic diphosphate transmembrane transporter activity // inferred from direct assay /// 0030504 // inorganic diphosphate transmembrane transporter activity // inferred from electronic an…	5	5p	1.47904e+07
228891_at	1		0.036	0.955	4.3	5.2	-0.8	0.574349		SEMA4D	SEMA4D	sema domain. immunoglobulin domain (Ig). transmembrane domain (TM) and short cytoplasmic domain. (semaphorin) 4D	---	0006916 // anti-apoptosis // traceable author statement /// 0006955 // immune response // traceable author statement /// 0007155 // cell adhesion // traceable author statement /// 0007275 // multicellular organismal development // inferred from electronic annotation /// 0007399 // nervous system development // inferred from electronic annotation /// 0030154 // cell differentiation // inferred fro…	0004872 // receptor activity // inferred from direct assay /// 0004872 // receptor activity // inferred from electronic annotation /// 0005102 // receptor binding // inferred from direct assay /// 0005102 // receptor binding // inferred from electronic annotation	9	9q	9.19767e+07
228805_at	1		0.039	0.955	5.6	6.4	-0.8	0.574349		C5orf25	C5orf25	chromosome 5 open reading frame 25	---	---	---	5	5q	1.75773e+08
238012_at	1		0.039	0.955	5.2	5.9	-0.8	0.574349		DPP7	DPP7	Dipeptidyl-peptidase 7	---	0006508 // proteolysis // inferred from electronic annotation	0004177 // aminopeptidase activity // inferred from electronic annotation /// 0005515 // protein binding // inferred from physical interaction /// 0008233 // peptidase activity // inferred from electronic annotation /// 0008236 // serine-type peptidase activity // inferred from electronic annotation /// 0008236 // serine-type peptidase activity // traceable author statement /// 0008239 // dipepti…	9	9q	1.40024e+08
204540_at	1		0.04	0.955	5.6	6.3	-0.8	0.574349		EEF1A2	EEF1A2	eukaryotic translation elongation factor 1 alpha 2	Translation_Factors // GenMAPP	0006412 // translation // inferred from electronic annotation /// 0006414 // translational elongation // inferred from electronic annotation /// 0010035 // response to inorganic substance // inferred from electronic annotation	0000166 // nucleotide binding // inferred from electronic annotation /// 0003746 // translation elongation factor activity // inferred from electronic annotation /// 0003924 // GTPase activity // inferred from electronic annotation /// 0005515 // protein binding // inferred from physical interaction /// 0005515 // protein binding // inferred from electronic annotation /// 0005525 // GTP binding /…	20	20q	6.21243e+07
241925_x_at	1		0.041	0.955	3.2	4	-0.8	0.574349		---	---	---	---	---	---	12	12q	6.0182e+07
206973_at	1		0.041	0.955	4.3	5.1	-0.8	0.574349		PPFIA2	PPFIA2	protein tyrosine phosphatase. receptor type. f polypeptide (PTPRF). interacting protein (liprin). alpha 2	---	0007160 // cell-matrix adhesion // traceable author statement	0005515 // protein binding // inferred from physical interaction /// 0005515 // protein binding // inferred from electronic annotation	12	12q	81903232
1555958_at	1		0.045	0.955	2.6	3.3	-0.8	0.574349		CRTAC1	CRTAC1	cartilage acidic protein 1	---	---	0005509 // calcium ion binding // inferred from electronic annotation	10	10q	9.97052e+07
232067_at	1		0.047	0.955	4.7	5.5	-0.8	0.574349		C6orf168	C6orf168	chromosome 6 open reading frame 168	---	---	---	6	6q	9.9763e+07
221088_s_at	1		0.049	0.955	5.2	6.1	-0.8	0.574349		PPP1R9A	PPP1R9A	protein phosphatase 1. regulatory (inhibitor) subunit 9A	---	0007015 // actin filament organization // inferred from electronic annotation /// 0007275 // multicellular organismal development // inferred from electronic annotation /// 0007399 // nervous system development // inferred from electronic annotation /// 0030154 // cell differentiation // inferred from electronic annotation /// 0031175 // neuron projection development // inferred from electronic a…	0003779 // actin binding // inferred from electronic annotation /// 0005515 // protein binding // inferred from electronic annotation	7	7q	9.49091e+07
1569796_s_at	1		0.007	0.955	3.4	4.1	-0.7	0.615572		ATRNL1	ATRNL1	attractin-like 1	---	0007186 // G-protein coupled receptor protein signaling pathway // inferred from electronic annotation	0005488 // binding // inferred from electronic annotation /// 0005515 // protein binding // inferred from electronic annotation /// 0005529 // sugar binding // inferred from electronic annotation	10	10q	1.16892e+08
215056_at	1		0.011	0.955	4.5	5.2	-0.7	0.615572		---	---	---	---	---	---	1	1q	230451197
239579_at	1		0.013	0.955	2.4	3.1	-0.7	0.615572		EPHX4	EPHX4	epoxide hydrolase 4	---	---	0003824 // catalytic activity // inferred from electronic annotation /// 0016787 // hydrolase activity // inferred from electronic annotation	1	1p	9.25237e+07
213913_s_at	1		0.014	0.955	4	4.7	-0.7	0.615572		TBC1D30	TBC1D30	TBC1 domain family. member 30	---	0032313 // regulation of Rab GTPase activity // inferred from electronic annotation	0005097 // Rab GTPase activator activity // inferred from electronic annotation	12	12q	6.52261e+07
228101_at	1		0.017	0.955	4.8	5.5	-0.7	0.615572		APBA1	APBA1	amyloid beta (A4) precursor protein-binding. family A. member 1	---	0001701 // in utero embryonic development // inferred from electronic annotation /// 0006461 // protein complex assembly // traceable author statement /// 0006810 // transport // inferred from electronic annotation /// 0006886 // intracellular protein transport // inferred from electronic annotation /// 0006886 // intracellular protein transport // traceable author statement /// 0007155 // cell a…	0005515 // protein binding // inferred from physical interaction /// 0005515 // protein binding // inferred from electronic annotation /// 0005546 // phosphatidylinositol-4.5-bisphosphate binding // inferred from electronic annotation /// 0030165 // PDZ domain binding // inferred from electronic annotation	9	9q	72043100
233072_at	1		0.018	0.955	3.7	4.4	-0.7	0.615572		NTNG2	NTNG2	netrin G2	---	0007275 // multicellular organismal development // inferred from electronic annotation /// 0007399 // nervous system development // inferred from electronic annotation /// 0007409 // axonogenesis // inferred from sequence or structural similarity /// 0007409 // axonogenesis // inferred from electronic annotation /// 0030154 // cell differentiation // inferred from electronic annotation	---	9	9q	135096084
204720_s_at	1		0.02	0.955	8.1	8.8	-0.7	0.615572		DNAJC6	DNAJC6	DnaJ (Hsp40) homolog. subfamily C. member 6	---	0006892 // post-Golgi vesicle-mediated transport // not recorded /// 0016044 // cellular membrane organization // not recorded	0004721 // phosphoprotein phosphatase activity // inferred from electronic annotation /// 0004725 // protein tyrosine phosphatase activity // inferred from electronic annotation /// 0016787 // hydrolase activity // inferred from electronic annotation /// 0017124 // SH3 domain binding // inferred from electronic annotation /// 0031072 // heat shock protein binding // inferred from electronic annot…	1	1p	65805994
207869_s_at	1		0.021	0.955	2.5	3.1	-0.7	0.615572		CACNA1G	CACNA1G	calcium channel. voltage-dependent. T type. alpha 1G subunit	---	0006810 // transport // traceable author statement /// 0006810 // transport // inferred from electronic annotation /// 0006811 // ion transport // inferred from electronic annotation /// 0006816 // calcium ion transport // inferred from electronic annotation /// 0007204 // elevation of cytosolic calcium ion concentration // inferred from electronic annotation /// 0014824 // artery smooth muscle c…	0005216 // ion channel activity // inferred from electronic annotation /// 0005244 // voltage-gated ion channel activity // inferred from electronic annotation /// 0005245 // voltage-gated calcium channel activity // inferred from electronic annotation /// 0005262 // calcium channel activity // inferred from electronic annotation /// 0008332 // low voltage-gated calcium channel activity // inferr…	17	17q	48671723
230198_at	1		0.027	0.955	3.8	4.5	-0.7	0.615572		LOC100130837	LOC100130837	Hypothetical LOC100130837	---	---	---	10	10p	1.09638e+06
239575_at	1		0.03	0.955	2.9	3.6	-0.7	0.615572		OPALIN	OPALIN	oligodendrocytic myelin paranodal and inner loop protein	---	---	---	10	10q	98103314
1558293_at	1		0.03	0.955	4.7	5.4	-0.7	0.615572		KIAA1107	KIAA1107	KIAA1107	---	---	---	1	1p	9.26482e+07
213744_at	1		0.031	0.955	3.3	4	-0.7	0.615572		ATRNL1	ATRNL1	attractin-like 1	---	0007186 // G-protein coupled receptor protein signaling pathway // inferred from electronic annotation	0005488 // binding // inferred from electronic annotation /// 0005515 // protein binding // inferred from electronic annotation /// 0005529 // sugar binding // inferred from electronic annotation	10	10q	117367446
218345_at	1		0.033	0.955	6.9	7.6	-0.7	0.615572		TMEM176A	TMEM176A	transmembrane protein 176A	---	---	---	7	7q	150500046
210650_s_at	1		0.036	0.955	2.6	3.2	-0.7	0.615572		PCLO	PCLO	piccolo (presynaptic cytomatrix protein)	---	0006810 // transport // inferred from electronic annotation /// 0007010 // cytoskeleton organization // inferred from sequence or structural similarity /// 0007010 // cytoskeleton organization // inferred from electronic annotation /// 0016079 // synaptic vesicle exocytosis // non-traceable author statement /// 0017157 // regulation of exocytosis // inferred from electronic annotation /// 0019933…	0005215 // transporter activity // inferred from electronic annotation /// 0005509 // calcium ion binding // inferred from sequence or structural similarity /// 0005515 // protein binding // inferred from electronic annotation /// 0005522 // profilin binding // inferred from sequence or structural similarity /// 0005522 // profilin binding // inferred from electronic annotation /// 0005544 // cal…	7	7q	82480101
243273_at	1		0.037	0.955	2.4	3.1	-0.7	0.615572		---	---	---	---	---	---	12	12q	81795902
238747_at	1		0.039	0.955	2.7	3.4	-0.7	0.615572		---	---	---	---	---	---	1	1q	181775604
220450_at	1		0.04	0.955	3.9	4.6	-0.7	0.615572		---	---	---	---	---	---	4	4q	1.46403e+08
210347_s_at	1		0.042	0.955	4.6	5.3	-0.7	0.615572		BCL11A	BCL11A	B-cell CLL/lymphoma 11A (zinc finger protein)	---	0006350 // transcription // inferred from electronic annotation /// 0016925 // protein sumoylation // inferred from sequence or structural similarity /// 0030097 // hemopoiesis // non-traceable author statement /// 0045449 // regulation of transcription // inferred from electronic annotation	0003676 // nucleic acid binding // inferred from electronic annotation /// 0008270 // zinc ion binding // inferred from electronic annotation /// 0046872 // metal ion binding // inferred from electronic annotation	2	2p	6.073e+07
204762_s_at	1		0.042	0.955	4.2	5	-0.7	0.615572		GNAO1	GNAO1	guanine nucleotide binding protein (G protein). alpha activating activity polypeptide O	Calcium_regulation_in_cardiac_cells // GenMAPP /// G_Protein_Signaling // GenMAPP	0006936 // muscle contraction // traceable author statement /// 0007165 // signal transduction // inferred from electronic annotation /// 0007186 // G-protein coupled receptor protein signaling pathway // inferred from electronic annotation /// 0007212 // dopamine receptor signaling pathway // inferred from electronic annotation /// 0007568 // aging // inferred from electronic annotation /// 0007…	0000166 // nucleotide binding // inferred from electronic annotation /// 0003924 // GTPase activity // traceable author statement /// 0004871 // signal transducer activity // inferred from electronic annotation /// 0005525 // GTP binding // not recorded /// 0005525 // GTP binding // inferred from electronic annotation /// 0019001 // guanyl nucleotide binding // inferred from electronic annotation…	16	16q	5.63084e+07
220131_at	1		0.045	0.955	3.8	4.5	-0.7	0.615572		FXYD7	FXYD7	FXYD domain containing ion transport regulator 7	---	0006810 // transport // inferred from electronic annotation /// 0006811 // ion transport // inferred from electronic annotation	0005216 // ion channel activity // inferred from electronic annotation	19	19q	35639679
226751_at	1		0.049	0.955	8.3	9	-0.7	0.615572		CNRIP1	CNRIP1	cannabinoid receptor interacting protein 1	---	---	0005515 // protein binding // inferred from physical interaction	2	2p	6.85336e+07
226016_at	1		0.001	0.955	8.9	9.5	-0.6	0.659754		CD47	CD47	CD47 molecule	---	0007155 // cell adhesion // inferred from electronic annotation /// 0007229 // integrin-mediated signaling pathway // traceable author statement /// 0007229 // integrin-mediated signaling pathway // inferred from electronic annotation /// 0008228 // opsonization // inferred from electronic annotation /// 0008284 // positive regulation of cell proliferation // inferred from direct assay /// 000961…	0005515 // protein binding // inferred from physical interaction /// 0005515 // protein binding // inferred from electronic annotation /// 0070053 // thrombospondin receptor activity // inferred from physical interaction	3	3q	107762708
216184_s_at	1		0.004	0.955	3.4	3.9	-0.6	0.659754		RIMS1	RIMS1	regulating synaptic membrane exocytosis 1	---	0006461 // protein complex assembly // inferred from direct assay /// 0006810 // transport // inferred from electronic annotation /// 0006836 // neurotransmitter transport // inferred from electronic annotation /// 0006886 // intracellular protein transport // inferred from electronic annotation /// 0006887 // exocytosis // inferred from electronic annotation /// 0006944 // cellular membrane fusi…	0005083 // small GTPase regulator activity // traceable author statement /// 0005515 // protein binding // inferred from physical interaction /// 0005515 // protein binding // inferred from electronic annotation /// 0008270 // zinc ion binding // inferred from electronic annotation /// 0017137 // Rab GTPase binding // inferred from electronic annotation /// 0046872 // metal ion binding // inferre…	6	6q	73035266
228579_at	1		0.005	0.955	5.9	6.5	-0.6	0.659754		---	---	---	---	---	---	8	8q	133133391
204500_s_at	1		0.007	0.955	7	7.6	-0.6	0.659754		AGTPBP1	AGTPBP1	ATP/GTP binding protein 1	---	0006508 // proteolysis // inferred from electronic annotation /// 0021702 // cerebellar Purkinje cell differentiation // inferred from electronic annotation /// 0042133 // neurotransmitter metabolic process // inferred from electronic annotation /// 0050905 // neuromuscular process // inferred from electronic annotation	0004180 // carboxypeptidase activity // inferred from electronic annotation /// 0004181 // metallocarboxypeptidase activity // inferred from electronic annotation /// 0005488 // binding // inferred from electronic annotation /// 0008233 // peptidase activity // inferred from electronic annotation /// 0008237 // metallopeptidase activity // inferred from electronic annotation /// 0008270 // zinc i…	9	9q	88244468
212935_at	1		0.011	0.955	6.6	7.2	-0.6	0.659754		MCF2L	MCF2L	MCF.2 cell line derived transforming sequence-like	---	0006915 // apoptosis // not recorded /// 0007266 // Rho protein signal transduction // inferred from electronic annotation /// 0008624 // induction of apoptosis by extracellular signals // not recorded /// 0035023 // regulation of Rho protein signal transduction // inferred from electronic annotation	0005085 // guanyl-nucleotide exchange factor activity // not recorded /// 0005085 // guanyl-nucleotide exchange factor activity // inferred from electronic annotation /// 0005089 // Rho guanyl-nucleotide exchange factor activity // inferred from electronic annotation /// 0005515 // protein binding // inferred from electronic annotation /// 0005545 // phosphatidylinositol binding // inferred from …	13	13q	113687872
1556029_s_at	1		0.012	0.955	2.6	3.2	-0.6	0.659754		NMNAT2	NMNAT2	nicotinamide nucleotide adenylyltransferase 2	---	0009058 // biosynthetic process // inferred from electronic annotation /// 0009435 // NAD biosynthetic process // inferred by curator /// 0009435 // NAD biosynthetic process // inferred from electronic annotation /// 0019363 // pyridine nucleotide biosynthetic process // inferred from electronic annotation /// 0019674 // NAD metabolic process // not recorded	0000166 // nucleotide binding // inferred from electronic annotation /// 0000309 // nicotinamide-nucleotide adenylyltransferase activity // inferred from electronic annotation /// 0004515 // nicotinate-nucleotide adenylyltransferase activity // inferred from direct assay /// 0004515 // nicotinate-nucleotide adenylyltransferase activity // inferred from electronic annotation /// 0005524 // ATP bin…	1	1q	1.8322e+08
1564392_at	1		0.013	0.955	2.6	3.1	-0.6	0.659754		C21orf131	C21orf131	chromosome 21 open reading frame 131	---	---	---	21	21q	22145141
215145_s_at	1		0.014	0.955	3.2	3.9	-0.6	0.659754		CNTNAP2	CNTNAP2	contactin associated protein-like 2	---	0007155 // cell adhesion // inferred from electronic annotation /// 0007165 // signal transduction // inferred from electronic annotation /// 0007420 // brain development // traceable author statement /// 0007610 // behavior // inferred from mutant phenotype /// 0008038 // neuron recognition // non-traceable author statement /// 0019226 // transmission of nerve impulse // non-traceable author sta…	0005102 // receptor binding // inferred from electronic annotation	7	7q	148074634
209462_at	1		0.017	0.955	7	7.6	-0.6	0.659754		APLP1	APLP1	amyloid beta (A4) precursor-like protein 1	---	0006897 // endocytosis // inferred from electronic annotation /// 0006915 // apoptosis // inferred from electronic annotation /// 0007155 // cell adhesion // inferred from electronic annotation /// 0007193 // inhibition of adenylate cyclase activity by G-protein signaling pathway // inferred by curator /// 0007399 // nervous system development // traceable author statement /// 0008219 // cell dea…	0005488 // binding // inferred from electronic annotation /// 0005515 // protein binding // inferred from physical interaction /// 0008201 // heparin binding // inferred from electronic annotation /// 0031694 // alpha-2A adrenergic receptor binding // inferred from physical interaction /// 0031695 // alpha-2B adrenergic receptor binding // inferred from physical interaction /// 0031696 // alpha-2…	19	19q	3.63651e+07
232203_at	1		0.018	0.955	5.1	5.7	-0.6	0.659754		---	---	---	---	---	---	16	16q	50673137
236691_at	1		0.019	0.955	3.9	4.5	-0.6	0.659754		LOC646509	LOC646509	Hypothetical LOC646509	---	---	---	2	2q	128646698
224164_at	1		0.02	0.955	4	4.6	-0.6	0.659754		TPM3	TPM3	tropomyosin 3	---	0006928 // cellular component movement // traceable author statement /// 0006936 // muscle contraction // not recorded /// 0006937 // regulation of muscle contraction // non-traceable author statement /// 0007420 // brain development // inferred from electronic annotation	0003779 // actin binding // inferred from electronic annotation /// 0005515 // protein binding // inferred from physical interaction	1	1q	154143347
233177_s_at	1		0.021	0.955	5.4	6	-0.6	0.659754		PNKD	PNKD	paroxysmal nonkinesigenic dyskinesia	---	---	0004416 // hydroxyacylglutathione hydrolase activity // inferred from electronic annotation /// 0008270 // zinc ion binding // inferred from electronic annotation /// 0016787 // hydrolase activity // inferred from electronic annotation /// 0046872 // metal ion binding // inferred from electronic annotation	2	2q	2.19173e+08
35147_at	1		0.022	0.955	6.4	7	-0.6	0.659754		MCF2L	MCF2L	MCF.2 cell line derived transforming sequence-like	---	0006915 // apoptosis // not recorded /// 0007266 // Rho protein signal transduction // inferred from electronic annotation /// 0008624 // induction of apoptosis by extracellular signals // not recorded /// 0035023 // regulation of Rho protein signal transduction // inferred from electronic annotation	0005085 // guanyl-nucleotide exchange factor activity // not recorded /// 0005085 // guanyl-nucleotide exchange factor activity // inferred from electronic annotation /// 0005089 // Rho guanyl-nucleotide exchange factor activity // inferred from electronic annotation /// 0005515 // protein binding // inferred from electronic annotation /// 0005545 // phosphatidylinositol binding // inferred from …	13	13q	1.13688e+08
219301_s_at	1		0.023	0.955	3.3	3.9	-0.6	0.659754		CNTNAP2	CNTNAP2	contactin associated protein-like 2	---	0007155 // cell adhesion // inferred from electronic annotation /// 0007165 // signal transduction // inferred from electronic annotation /// 0007420 // brain development // traceable author statement /// 0007610 // behavior // inferred from mutant phenotype /// 0008038 // neuron recognition // non-traceable author statement /// 0019226 // transmission of nerve impulse // non-traceable author sta…	0005102 // receptor binding // inferred from electronic annotation	7	7q	146966011
231550_at	1		0.023	0.955	5.6	6.2	-0.6	0.659754		XYLT2	XYLT2	Xylosyltransferase II	---	0006024 // glycosaminoglycan biosynthetic process // non-traceable author statement	0008375 // acetylglucosaminyltransferase activity // inferred from electronic annotation /// 0016740 // transferase activity // inferred from electronic annotation /// 0016757 // transferase activity. transferring glycosyl groups // inferred from electronic annotation /// 0030158 // protein xylosyltransferase activity // non-traceable author statement /// 0030158 // protein xylosyltransferase act…	17	17q	48438194
228987_at	1		0.027	0.955	5.3	5.8	-0.6	0.659754		---	---	---	---	---	---	8	8q	130852226
225815_at	1		0.028	0.955	3.3	3.9	-0.6	0.659754		CPLX2	CPLX2	complexin 2	---	0006810 // transport // inferred from electronic annotation /// 0006836 // neurotransmitter transport // inferred from electronic annotation /// 0006887 // exocytosis // inferred from electronic annotation /// 0006904 // vesicle docking involved in exocytosis // traceable author statement /// 0016079 // synaptic vesicle exocytosis // inferred from electronic annotation /// 0043303 // mast cell de…	0000149 // SNARE binding // inferred from electronic annotation /// 0017075 // syntaxin-1 binding // inferred from electronic annotation /// 0019905 // syntaxin binding // inferred from electronic annotation	5	5q	1.7531e+08
232239_at	1		0.029	0.955	5.4	6	-0.6	0.659754		LOC643529	LOC643529	hCG2024094	---	---	---	10	10q	91594891
219956_at	1		0.029	0.955	3.7	4.2	-0.6	0.659754		GALNT6	GALNT6	UDP-N-acetyl-alpha-D-galactosamine:polypeptide N-acetylgalactosaminyltransferase 6 (GalNAc-T6)	---	0006493 // protein O-linked glycosylation // traceable author statement	0004653 // polypeptide N-acetylgalactosaminyltransferase activity // inferred from electronic annotation /// 0004653 // polypeptide N-acetylgalactosaminyltransferase activity // traceable author statement /// 0005529 // sugar binding // inferred from electronic annotation /// 0016740 // transferase activity // inferred from electronic annotation /// 0016757 // transferase activity. transferring g…	12	12q	51760366
242651_at	1		0.029	0.955	3.7	4.3	-0.6	0.659754		---	---	---	---	---	---	3	3q	182894121
1558819_at	1		0.032	0.955	2.1	2.7	-0.6	0.659754		---	---	---	---	---	---	8	8q	70748212
204547_at	1		0.035	0.955	6.6	7.2	-0.6	0.659754		RAB40B	RAB40B	RAB40B. member RAS oncogene family	---	0007264 // small GTPase mediated signal transduction // inferred from electronic annotation /// 0015031 // protein transport // inferred from electronic annotation /// 0023034 // intracellular signaling pathway // inferred from electronic annotation	0000166 // nucleotide binding // inferred from electronic annotation /// 0005525 // GTP binding // inferred from electronic annotation	17	17q	8.06357e+07
1566825_at	1		0.036	0.955	3	3.7	-0.6	0.659754		---	---	---	---	---	---	4	4q	8.65984e+07
236448_at	1		0.036	0.955	3.2	3.7	-0.6	0.659754		UNC5A	UNC5A	unc-5 homolog A (C. elegans)	---	0006915 // apoptosis // inferred from electronic annotation /// 0007165 // signal transduction // inferred from electronic annotation /// 0007275 // multicellular organismal development // inferred from electronic annotation /// 0007411 // axon guidance // inferred from electronic annotation	0004872 // receptor activity // inferred from electronic annotation /// 0005042 // netrin receptor activity // inferred from electronic annotation /// 0005515 // protein binding // inferred from electronic annotation	5	5q	176306411
206385_s_at	1		0.037	0.955	7	7.6	-0.6	0.659754		ANK3	ANK3	ankyrin 3. node of Ranvier (ankyrin G)	---	0007016 // cytoskeletal anchoring at plasma membrane // traceable author statement /// 0007165 // signal transduction // inferred from electronic annotation /// 0007411 // axon guidance // inferred from electronic annotation /// 0045184 // establishment of protein localization // inferred from mutant phenotype /// 0050808 // synapse organization // inferred from electronic annotation	0005515 // protein binding // inferred from physical interaction /// 0005515 // protein binding // inferred from electronic annotation	10	10q	6.19688e+07
230552_at	1		0.037	0.955	3.7	4.4	-0.6	0.659754		LOC100134317	LOC100134317 /// LOC284412	hypothetical LOC100134317 /// hypothetical LOC284412	---	---	---	19	19q	3.6803e+07
1562288_at	1		0.039	0.955	3.6	4.3	-0.6	0.659754		---	---	---	---	---	---	1	1p	1.21172e+08
204763_s_at	1		0.042	0.955	6	6.6	-0.6	0.659754		GNAO1	GNAO1	guanine nucleotide binding protein (G protein). alpha activating activity polypeptide O	Calcium_regulation_in_cardiac_cells // GenMAPP /// G_Protein_Signaling // GenMAPP	0006936 // muscle contraction // traceable author statement /// 0007165 // signal transduction // inferred from electronic annotation /// 0007186 // G-protein coupled receptor protein signaling pathway // inferred from electronic annotation /// 0007212 // dopamine receptor signaling pathway // inferred from electronic annotation /// 0007568 // aging // inferred from electronic annotation /// 0007…	0000166 // nucleotide binding // inferred from electronic annotation /// 0003924 // GTPase activity // traceable author statement /// 0004871 // signal transducer activity // inferred from electronic annotation /// 0005525 // GTP binding // not recorded /// 0005525 // GTP binding // inferred from electronic annotation /// 0019001 // guanyl nucleotide binding // inferred from electronic annotation…	16	16q	5.63086e+07
227224_at	1		0.045	0.955	5.2	5.9	-0.6	0.659754		RALGPS2	RALGPS2	Ral GEF with PH domain and SH3 binding motif 2	---	0007264 // small GTPase mediated signal transduction // inferred from electronic annotation	0005085 // guanyl-nucleotide exchange factor activity // inferred from electronic annotation /// 0005515 // protein binding // inferred from physical interaction	1	1q	1.78888e+08
226113_at	1		0.046	0.955	7.2	7.8	-0.6	0.659754		ZNF436	ZNF436	zinc finger protein 436	---	0006350 // transcription // inferred from electronic annotation /// 0006355 // regulation of transcription. DNA-dependent // inferred from electronic annotation /// 0045449 // regulation of transcription // inferred from electronic annotation	0003676 // nucleic acid binding // inferred from electronic annotation /// 0003677 // DNA binding // inferred from electronic annotation /// 0008270 // zinc ion binding // inferred from electronic annotation /// 0046872 // metal ion binding // inferred from electronic annotation	1	1p	2.36911e+07
205428_s_at	1		0.049	0.955	4.1	4.7	-0.6	0.659754		CALB2	CALB2	calbindin 2	---	---	0005509 // calcium ion binding // inferred from electronic annotation	16	16q	71408480
209583_s_at	1		0.05	0.955	7	7.6	-0.6	0.659754		CD200	CD200	CD200 molecule	---	---	0005515 // protein binding // inferred from electronic annotation	3	3q	1.12067e+08
1552712_a_at			0.005	0.955	4.2	4.8	-0.5	0.707107		NMNAT2	NMNAT2	nicotinamide nucleotide adenylyltransferase 2	---	0009058 // biosynthetic process // inferred from electronic annotation /// 0009435 // NAD biosynthetic process // inferred by curator /// 0009435 // NAD biosynthetic process // inferred from electronic annotation /// 0019363 // pyridine nucleotide biosynthetic process // inferred from electronic annotation /// 0019674 // NAD metabolic process // not recorded	0000166 // nucleotide binding // inferred from electronic annotation /// 0000309 // nicotinamide-nucleotide adenylyltransferase activity // inferred from electronic annotation /// 0004515 // nicotinate-nucleotide adenylyltransferase activity // inferred from direct assay /// 0004515 // nicotinate-nucleotide adenylyltransferase activity // inferred from electronic annotation /// 0005524 // ATP bin…	1	1q	183247328
233076_at			0.006	0.955	3.2	3.7	-0.5	0.707107		JAKMIP3	JAKMIP3	Janus kinase and microtubule interacting protein 3	---	---	---	10	10q	133997003
240629_at			0.006	0.955	2.9	3.4	-0.5	0.707107		---	---	---	---	---	---	11	11q	75381771
206713_at			0.01	0.955	2.8	3.2	-0.5	0.707107		NTNG1	NTNG1	netrin G1	---	0007275 // multicellular organismal development // inferred from electronic annotation /// 0007399 // nervous system development // inferred from electronic annotation /// 0007409 // axonogenesis // inferred from sequence or structural similarity /// 0007409 // axonogenesis // inferred from electronic annotation /// 0030154 // cell differentiation // inferred from electronic annotation	0005515 // protein binding // inferred from physical interaction	1	1p	1.07818e+08
239857_at			0.011	0.955	3.7	4.2	-0.5	0.707107		---	---	---	---	---	---	4	4p	1.74861e+07
229534_at			0.011	0.955	2.9	3.4	-0.5	0.707107		ACOT4	ACOT4	acyl-CoA thioesterase 4	---	0000038 // very long-chain fatty acid metabolic process // inferred from direct assay /// 0001676 // long-chain fatty acid metabolic process // inferred from direct assay /// 0006104 // succinyl-CoA metabolic process // inferred from direct assay /// 0006104 // succinyl-CoA metabolic process // inferred from electronic annotation /// 0006629 // lipid metabolic process // inferred from electronic …	0004091 // carboxylesterase activity // inferred from electronic annotation /// 0016290 // palmitoyl-CoA hydrolase activity // inferred from electronic annotation /// 0016291 // acyl-CoA thioesterase activity // inferred from direct assay /// 0016291 // acyl-CoA thioesterase activity // inferred from electronic annotation /// 0016787 // hydrolase activity // inferred from electronic annotation //…	14	14q	74060782
219448_at			0.014	0.955	4.9	5.3	-0.5	0.707107		TMEM70	TMEM70	transmembrane protein 70	---	0033615 // mitochondrial proton-transporting ATP synthase complex assembly // inferred from mutant phenotype	---	8	8q	7.48917e+07
239108_at			0.016	0.955	5.4	5.9	-0.5	0.707107		FAR2	FAR2	Fatty acyl CoA reductase 2	---	0006629 // lipid metabolic process // inferred from electronic annotation /// 0008152 // metabolic process // inferred from electronic annotation /// 0008610 // lipid biosynthetic process // inferred from electronic annotation /// 0044255 // cellular lipid metabolic process // not recorded /// 0055114 // oxidation reduction // inferred from electronic annotation	0003824 // catalytic activity // inferred from electronic annotation /// 0005488 // binding // inferred from electronic annotation /// 0016491 // oxidoreductase activity // not recorded /// 0016491 // oxidoreductase activity // inferred from electronic annotation /// 0016620 // oxidoreductase activity. acting on the aldehyde or oxo group of donors. NAD or NADP as acceptor // inferred from electro…	12	12p	29488339
224327_s_at			0.018	0.955	4	4.5	-0.5	0.707107		DGAT2	DGAT2	diacylglycerol O-acyltransferase 2	---	0006071 // glycerol metabolic process // inferred from electronic annotation /// 0006629 // lipid metabolic process // inferred from electronic annotation /// 0008610 // lipid biosynthetic process // inferred from electronic annotation /// 0019432 // triglyceride biosynthetic process // not recorded /// 0019432 // triglyceride biosynthetic process // inferred from direct assay /// 0019432 // trig…	0003846 // 2-acylglycerol O-acyltransferase activity // inferred from electronic annotation /// 0004144 // diacylglycerol O-acyltransferase activity // inferred from direct assay /// 0004144 // diacylglycerol O-acyltransferase activity // inferred from electronic annotation /// 0008415 // acyltransferase activity // inferred from electronic annotation /// 0016740 // transferase activity // inferr…	11	11q	75505872
210380_s_at			0.02	0.955	4.3	4.8	-0.5	0.707107		CACNA1G	CACNA1G	calcium channel. voltage-dependent. T type. alpha 1G subunit	---	0006810 // transport // traceable author statement /// 0006810 // transport // inferred from electronic annotation /// 0006811 // ion transport // inferred from electronic annotation /// 0006816 // calcium ion transport // inferred from electronic annotation /// 0007204 // elevation of cytosolic calcium ion concentration // inferred from electronic annotation /// 0014824 // artery smooth muscle c…	0005216 // ion channel activity // inferred from electronic annotation /// 0005244 // voltage-gated ion channel activity // inferred from electronic annotation /// 0005245 // voltage-gated calcium channel activity // inferred from electronic annotation /// 0005262 // calcium channel activity // inferred from electronic annotation /// 0008332 // low voltage-gated calcium channel activity // inferr…	17	17q	48671538
224393_s_at			0.021	0.955	4.7	5.2	-0.5	0.707107		CECR6	CECR6	cat eye syndrome chromosome region. candidate 6	---	---	---	22	22q	17599666
1555461_at			0.021	0.955	5	5.6	-0.5	0.707107		---	---	---	---	---	---	13	13q	50204092
240784_at			0.021	0.955	3.9	4.3	-0.5	0.707107		C7orf52	C7orf52	chromosome 7 open reading frame 52	---	0008152 // metabolic process // inferred from electronic annotation	0008080 // N-acetyltransferase activity // inferred from electronic annotation /// 0008415 // acyltransferase activity // inferred from electronic annotation /// 0016740 // transferase activity // inferred from electronic annotation	7	7q	1.00814e+08
238786_at			0.021	0.955	2.5	2.9	-0.5	0.707107		---	---	---	---	---	---	10	10q	6.17865e+07
231114_at			0.023	0.955	2.1	2.7	-0.5	0.707107		SPATA22	SPATA22	spermatogenesis associated 22	---	---	---	17	17p	3.34494e+06
44040_at			0.024	0.955	5.1	5.6	-0.5	0.707107		FBXO41	FBXO41	F-box protein 41	---	---	0005515 // protein binding // inferred from physical interaction /// 0008270 // zinc ion binding // inferred from electronic annotation	2	2p	73482057
205803_s_at			0.025	0.955	6.4	6.9	-0.5	0.707107		TRPC1	TRPC1	transient receptor potential cation channel. subfamily C. member 1	---	0006810 // transport // inferred from electronic annotation /// 0006811 // ion transport // inferred from electronic annotation /// 0006816 // calcium ion transport // inferred from electronic annotation /// 0006816 // calcium ion transport // traceable author statement /// 0046541 // saliva secretion // inferred from electronic annotation /// 0051281 // positive regulation of release of sequeste…	0004872 // receptor activity // inferred from electronic annotation /// 0005216 // ion channel activity // inferred from electronic annotation /// 0005262 // calcium channel activity // traceable author statement /// 0005262 // calcium channel activity // inferred from electronic annotation /// 0005515 // protein binding // inferred from physical interaction /// 0005515 // protein binding // infe…	3	3q	1.42485e+08
209615_s_at			0.025	0.955	3.9	4.4	-0.5	0.707107		PAK1	PAK1	p21 protein (Cdc42/Rac)-activated kinase 1	Integrin-mediated_cell_adhesion_KEGG // GenMAPP	0000165 // MAPKKK cascade // inferred from direct assay /// 0001666 // response to hypoxia // inferred from electronic annotation /// 0006468 // protein phosphorylation // inferred from direct assay /// 0006468 // protein phosphorylation // inferred from electronic annotation /// 0006915 // apoptosis // inferred from electronic annotation /// 0006984 // ER-nucleus signaling pathway // traceable a…	0000166 // nucleotide binding // inferred from electronic annotation /// 0004672 // protein kinase activity // inferred from direct assay /// 0004672 // protein kinase activity // inferred from electronic annotation /// 0004674 // protein serine/threonine kinase activity // not recorded /// 0004674 // protein serine/threonine kinase activity // traceable author statement /// 0004674 // protein se…	11	11q	77109448
34408_at			0.026	0.955	5.4	5.9	-0.5	0.707107		RTN2	RTN2	reticulon 2	---	0007165 // signal transduction // non-traceable author statement	0004871 // signal transducer activity // non-traceable author statement	19	19q	4.59944e+07
205721_at			0.027	0.955	3.7	4.2	-0.5	0.707107		GFRA2	GFRA2	GDNF family receptor alpha 2	---	0007169 // transmembrane receptor protein tyrosine kinase signaling pathway // traceable author statement	0004872 // receptor activity // inferred from electronic annotation /// 0016167 // glial cell line-derived neurotrophic factor receptor activity // traceable author statement	8	8p	2.15977e+07
244481_at			0.029	0.955	3.2	3.7	-0.5	0.707107		SLC25A24	SLC25A24	Solute carrier family 25 (mitochondrial carrier; phosphate carrier). member 24	---	0006810 // transport // inferred from electronic annotation /// 0055085 // transmembrane transport // inferred from electronic annotation	0005488 // binding // inferred from electronic annotation /// 0005509 // calcium ion binding // inferred from electronic annotation	1	1p	1.08744e+08
1554624_a_at			0.03	0.955	2.5	3	-0.5	0.707107		SIRPB1	SIRPB1	signal-regulatory protein beta 1	---	0007165 // signal transduction // traceable author statement /// 0007166 // cell surface receptor linked signaling pathway // traceable author statement	0005515 // protein binding // inferred from physical interaction	20	20p	1572842
229449_at			0.032	0.955	4.7	5.2	-0.5	0.707107		---	---	---	---	---	---	22	22q	2.69182e+07
218184_at			0.033	0.955	6.6	7.1	-0.5	0.707107		TULP4	TULP4	tubby like protein 4	---	0006355 // regulation of transcription. DNA-dependent // non-traceable author statement /// 0007584 // response to nutrient // traceable author statement	0003700 // sequence-specific DNA binding transcription factor activity // non-traceable author statement /// 0005515 // protein binding // inferred from physical interaction	6	6q	1.58833e+08
218532_s_at			0.033	0.955	7.9	8.5	-0.5	0.707107		FAM134B	FAM134B	family with sequence similarity 134. member B	---	0019233 // sensory perception of pain // inferred from mutant phenotype	---	5	5p	1.64743e+07
1560577_at			0.033	0.955	3.5	4	-0.5	0.707107		---	---	---	---	---	---	17	17q	4.70227e+07
223574_x_at			0.034	0.955	2.8	3.3	-0.5	0.707107		PPP2R2C	PPP2R2C	protein phosphatase 2. regulatory subunit B. gamma	Glycogen_Metabolism // GenMAPP	0007165 // signal transduction // non-traceable author statement /// 0007165 // signal transduction // inferred from electronic annotation	0008601 // protein phosphatase type 2A regulator activity // non-traceable author statement /// 0008601 // protein phosphatase type 2A regulator activity // inferred from electronic annotation	4	4p	6399396
206852_at			0.034	0.955	2.1	2.6	-0.5	0.707107		EPHA7	EPHA7	EPH receptor A7	---	0006468 // protein phosphorylation // inferred from electronic annotation /// 0007169 // transmembrane receptor protein tyrosine kinase signaling pathway // inferred from electronic annotation /// 0016310 // phosphorylation // inferred from sequence or structural similarity /// 0016310 // phosphorylation // inferred from electronic annotation /// 0031290 // retinal ganglion cell axon guidance // …	0000166 // nucleotide binding // inferred from electronic annotation /// 0004672 // protein kinase activity // inferred from electronic annotation /// 0004713 // protein tyrosine kinase activity // inferred from sequence or structural similarity /// 0004713 // protein tyrosine kinase activity // inferred from electronic annotation /// 0004714 // transmembrane receptor protein tyrosine kinase acti…	6	6q	9.40405e+07
203528_at			0.036	0.955	5.4	5.9	-0.5	0.707107		SEMA4D	SEMA4D	sema domain. immunoglobulin domain (Ig). transmembrane domain (TM) and short cytoplasmic domain. (semaphorin) 4D	---	0006916 // anti-apoptosis // traceable author statement /// 0006955 // immune response // traceable author statement /// 0007155 // cell adhesion // traceable author statement /// 0007275 // multicellular organismal development // inferred from electronic annotation /// 0007399 // nervous system development // inferred from electronic annotation /// 0030154 // cell differentiation // inferred fro…	0004872 // receptor activity // inferred from direct assay /// 0004872 // receptor activity // inferred from electronic annotation /// 0005102 // receptor binding // inferred from direct assay /// 0005102 // receptor binding // inferred from electronic annotation	9	9q	9.20063e+07
227782_at			0.036	0.955	5.1	5.6	-0.5	0.707107		ZBTB7C	ZBTB7C	zinc finger and BTB domain containing 7C	---	---	0003676 // nucleic acid binding // inferred from electronic annotation /// 0005515 // protein binding // inferred from electronic annotation /// 0008270 // zinc ion binding // inferred from electronic annotation /// 0046872 // metal ion binding // inferred from electronic annotation	18	18q	4.55546e+07
203037_s_at			0.037	0.955	9	9.5	-0.5	0.707107		MTSS1	MTSS1	metastasis suppressor 1	---	0006928 // cellular component movement // non-traceable author statement /// 0007155 // cell adhesion // non-traceable author statement /// 0007165 // signal transduction // inferred from electronic annotation /// 0007169 // transmembrane receptor protein tyrosine kinase signaling pathway // traceable author statement /// 0030035 // microspike assembly // non-traceable author statement /// 003003…	0003779 // actin binding // inferred from electronic annotation /// 0003785 // actin monomer binding // inferred from direct assay /// 0005102 // receptor binding // inferred from physical interaction /// 0008093 // cytoskeletal adaptor activity // inferred from electronic annotation /// 0017124 // SH3 domain binding // inferred from electronic annotation	8	8q	1.25568e+08
243242_at			0.038	0.955	2.6	3.1	-0.5	0.707107		---	---	---	---	---	---	11	11q	123947377
227974_at			0.042	0.955	5.3	5.8	-0.5	0.707107		---	---	---	---	---	---	5	5p	1.35067e+06
205719_s_at			0.042	0.955	2.1	2.5	-0.5	0.707107		PAH	PAH	phenylalanine hydroxylase	Biogenic_Amine_Synthesis // GenMAPP	0006558 // L-phenylalanine metabolic process // inferred from electronic annotation /// 0006559 // L-phenylalanine catabolic process // inferred from electronic annotation /// 0006571 // tyrosine biosynthetic process // inferred from electronic annotation /// 0008152 // metabolic process // inferred from electronic annotation /// 0008652 // cellular amino acid biosynthetic process // traceable au…	0004497 // monooxygenase activity // inferred from electronic annotation /// 0004505 // phenylalanine 4-monooxygenase activity // inferred from electronic annotation /// 0004505 // phenylalanine 4-monooxygenase activity // traceable author statement /// 0005506 // iron ion binding // inferred from electronic annotation /// 0016491 // oxidoreductase activity // inferred from electronic annotation …	12	12q	103271742
206767_at			0.043	0.955	3.8	4.2	-0.5	0.707107		RBMS3	RBMS3	RNA binding motif. single stranded interacting protein 3	---	---	0000166 // nucleotide binding // inferred from electronic annotation /// 0003676 // nucleic acid binding // inferred from electronic annotation /// 0003723 // RNA binding // inferred from electronic annotation	3	3p	2.96779e+07
204680_s_at			0.045	0.955	3	3.5	-0.5	0.707107		RAPGEF5	RAPGEF5	Rap guanine nucleotide exchange factor (GEF) 5	---	0007264 // small GTPase mediated signal transduction // non-traceable author statement /// 0007264 // small GTPase mediated signal transduction // inferred from electronic annotation /// 0007399 // nervous system development // non-traceable author statement /// 0051056 // regulation of small GTPase mediated signal transduction // inferred from electronic annotation	0005085 // guanyl-nucleotide exchange factor activity // inferred from electronic annotation /// 0005088 // Ras guanyl-nucleotide exchange factor activity // traceable author statement /// 0017034 // Rap guanyl-nucleotide exchange factor activity // inferred from direct assay /// 0030742 // GTP-dependent protein binding // inferred from physical interaction	7	7p	2.21956e+07
1553997_a_at			0.047	0.955	5.8	6.3	-0.5	0.707107		ASPHD1	ASPHD1	aspartate beta-hydroxylase domain containing 1	---	0018193 // peptidyl-amino acid modification // inferred from electronic annotation /// 0055114 // oxidation reduction // inferred from electronic annotation	0004597 // peptide-aspartate beta-dioxygenase activity // inferred from electronic annotation /// 0016491 // oxidoreductase activity // inferred from electronic annotation /// 0016702 // oxidoreductase activity. acting on single donors with incorporation of molecular oxygen. incorporation of two atoms of oxygen // inferred from electronic annotation	16	16p	29914708
33197_at			0.049	0.955	4.8	5.3	-0.5	0.707107		MYO7A	MYO7A	myosin VIIA	---	0001845 // phagolysosome assembly // inferred from electronic annotation /// 0006909 // phagocytosis // inferred from electronic annotation /// 0007040 // lysosome organization // inferred from direct assay /// 0007600 // sensory perception // inferred from electronic annotation /// 0007601 // visual perception // inferred from mutant phenotype /// 0007601 // visual perception // inferred from el…	0000146 // microfilament motor activity // non-traceable author statement /// 0000166 // nucleotide binding // inferred from electronic annotation /// 0003774 // motor activity // non-traceable author statement /// 0003774 // motor activity // inferred from reviewed computational analysis /// 0003774 // motor activity // inferred from electronic annotation /// 0003779 // actin binding // inferred…	11	11q	76882796
237177_at			0.003	0.955	2	2.4	-0.4	0.757858		CNTN4	CNTN4	contactin 4	---	0007155 // cell adhesion // inferred from electronic annotation /// 0007158 // neuron cell-cell adhesion // traceable author statement /// 0007399 // nervous system development // inferred from mutant phenotype /// 0007409 // axonogenesis // traceable author statement /// 0007411 // axon guidance // traceable author statement /// 0007413 // axonal fasciculation // traceable author statement /// 0…	0005515 // protein binding // inferred from physical interaction	3	3p	3096788
213343_s_at			0.003	0.955	4.9	5.2	-0.4	0.757858		GDPD5	GDPD5	glycerophosphodiester phosphodiesterase domain containing 5	---	0006071 // glycerol metabolic process // inferred from electronic annotation /// 0006629 // lipid metabolic process // inferred from electronic annotation /// 0007399 // nervous system development // inferred from electronic annotation	0008081 // phosphoric diester hydrolase activity // inferred from electronic annotation /// 0008889 // glycerophosphodiester phosphodiesterase activity // inferred from electronic annotation /// 0016787 // hydrolase activity // inferred from electronic annotation	11	11q	7.51493e+07
235437_at			0.003	0.955	3.6	4	-0.4	0.757858		---	---	---	---	---	---	16	16p	3056850
205722_s_at			0.003	0.955	3	3.4	-0.4	0.757858		GFRA2	GFRA2	GDNF family receptor alpha 2	---	0007169 // transmembrane receptor protein tyrosine kinase signaling pathway // traceable author statement	0004872 // receptor activity // inferred from electronic annotation /// 0016167 // glial cell line-derived neurotrophic factor receptor activity // traceable author statement	8	8p	21598199
227144_at			0.003	0.955	6	6.5	-0.4	0.757858		C22orf9	C22orf9	chromosome 22 open reading frame 9	---	---	0005515 // protein binding // inferred from physical interaction	22	22q	45588992
203031_s_at			0.005	0.955	5.9	6.3	-0.4	0.757858		UROS	UROS	uroporphyrinogen III synthase	Heme_Biosynthesis // GenMAPP	0006779 // porphyrin biosynthetic process // inferred from electronic annotation /// 0006780 // uroporphyrinogen III biosynthetic process // inferred from direct assay /// 0006783 // heme biosynthetic process // inferred by curator /// 0006783 // heme biosynthetic process // inferred from direct assay /// 0006783 // heme biosynthetic process // inferred from electronic annotation /// 0014075 // r…	0004852 // uroporphyrinogen-III synthase activity // inferred from direct assay /// 0004852 // uroporphyrinogen-III synthase activity // inferred from electronic annotation /// 0016829 // lyase activity // inferred from electronic annotation /// 0048037 // cofactor binding // inferred from electronic annotation	10	10q	127494459
1556332_at			0.006	0.955	3.4	3.8	-0.4	0.757858		---	---	---	---	---	---	1	1p	33396968
230759_at			0.006	0.955	5.1	5.5	-0.4	0.757858		SNX14	SNX14	Sorting nexin 14	---	0006810 // transport // inferred from electronic annotation /// 0007154 // cell communication // inferred from electronic annotation /// 0015031 // protein transport // inferred from electronic annotation	0004871 // signal transducer activity // inferred from electronic annotation /// 0005515 // protein binding // inferred from electronic annotation /// 0035091 // phosphoinositide binding // inferred from electronic annotation	6	6q	8.62168e+07
211137_s_at			0.007	0.955	7.3	7.6	-0.4	0.757858		ATP2C1	ATP2C1	ATPase. Ca++ transporting. type 2C. member 1	---	0006754 // ATP biosynthetic process // inferred from electronic annotation /// 0006810 // transport // inferred from electronic annotation /// 0006811 // ion transport // inferred from electronic annotation /// 0006812 // cation transport // inferred from electronic annotation /// 0006816 // calcium ion transport // inferred from direct assay /// 0006816 // calcium ion transport // inferred from …	0000166 // nucleotide binding // inferred from electronic annotation /// 0003824 // catalytic activity // inferred from electronic annotation /// 0004871 // signal transducer activity // inferred from mutant phenotype /// 0005388 // calcium-transporting ATPase activity // inferred from direct assay /// 0005388 // calcium-transporting ATPase activity // inferred from mutant phenotype /// 0005388 /…	3	3q	1.30668e+08
212421_at			0.008	0.955	5.8	6.2	-0.4	0.757858		C22orf9	C22orf9	chromosome 22 open reading frame 9	---	---	0005515 // protein binding // inferred from physical interaction	22	22q	4.55992e+07
236211_at			0.008	0.955	2.9	3.4	-0.4	0.757858		LOC100506019	LOC100506019	hypothetical LOC100506019	---	---	---	17	17q	80613037
223441_at			0.008	0.955	6.9	7.3	-0.4	0.757858		SLC17A5	SLC17A5	solute carrier family 17 (anion/sugar transporter). member 5	---	0006810 // transport // inferred from electronic annotation /// 0006820 // anion transport // traceable author statement /// 0008643 // carbohydrate transport // inferred from electronic annotation /// 0015739 // sialic acid transport // inferred from direct assay /// 0015739 // sialic acid transport // inferred from electronic annotation /// 0055085 // transmembrane transport // inferred from el…	0005351 // sugar:hydrogen symporter activity // traceable author statement /// 0015136 // sialic acid transmembrane transporter activity // inferred from direct assay /// 0015136 // sialic acid transmembrane transporter activity // inferred from electronic annotation /// 0015293 // symporter activity // inferred from electronic annotation	6	6q	74333579
219543_at			0.01	0.955	5.2	5.6	-0.4	0.757858		PBLD	PBLD	phenazine biosynthesis-like protein domain containing	---	0009058 // biosynthetic process // inferred from electronic annotation	0003824 // catalytic activity // inferred from electronic annotation /// 0016853 // isomerase activity // inferred from electronic annotation	10	10q	7.00497e+07
204935_at			0.012	0.955	3.4	3.8	-0.4	0.757858		PTPN2	PTPN2	protein tyrosine phosphatase. non-receptor type 2	---	0006470 // protein dephosphorylation // inferred from electronic annotation /// 0006470 // protein dephosphorylation // traceable author statement /// 0008286 // insulin receptor signaling pathway // inferred from electronic annotation /// 0016311 // dephosphorylation // inferred from electronic annotation	0004721 // phosphoprotein phosphatase activity // inferred from electronic annotation /// 0004725 // protein tyrosine phosphatase activity // traceable author statement /// 0004725 // protein tyrosine phosphatase activity // inferred from electronic annotation /// 0004726 // non-membrane spanning protein tyrosine phosphatase activity // inferred from electronic annotation /// 0004872 // receptor …	18	18p	1.28387e+07
1568832_a_at			0.012	0.955	2.3	2.7	-0.4	0.757858		---	---	---	---	---	---	1	1q	179923056
239117_at			0.014	0.955	4.4	4.8	-0.4	0.757858		---	---	---	---	---	---	15	15q	31617377
214270_s_at			0.015	0.955	3.3	3.6	-0.4	0.757858		MAPRE3	MAPRE3	microtubule-associated protein. RP/EB family. member 3	---	0007049 // cell cycle // inferred from sequence or structural similarity /// 0007049 // cell cycle // inferred from electronic annotation /// 0007067 // mitosis // inferred from electronic annotation /// 0043193 // positive regulation of gene-specific transcription // inferred from sequence or structural similarity /// 0043193 // positive regulation of gene-specific transcription // inferred from…	0005083 // small GTPase regulator activity // non-traceable author statement /// 0005515 // protein binding // inferred from physical interaction /// 0005515 // protein binding // inferred from electronic annotation /// 0008017 // microtubule binding // inferred from sequence or structural similarity /// 0008017 // microtubule binding // inferred from electronic annotation	2	2p	27247752
209498_at			0.016	0.955	2.5	2.9	-0.4	0.757858		CEACAM1	CEACAM1	carcinoembryonic antigen-related cell adhesion molecule 1 (biliary glycoprotein)	---	0001525 // angiogenesis // non-traceable author statement /// 0007156 // homophilic cell adhesion // non-traceable author statement /// 0007229 // integrin-mediated signaling pathway // non-traceable author statement /// 0007565 // female pregnancy // traceable author statement /// 0016477 // cell migration // non-traceable author statement	---	19	19q	4.3022e+07
1563511_at			0.017	0.955	4.1	4.5	-0.4	0.757858		DKFZp451B082	DKFZp451B082	hypothetical LOC401282	---	---	---	6	6q	163763719
203414_at			0.018	0.955	8.8	9.2	-0.4	0.757858		MMD	MMD	monocyte to macrophage differentiation-associated	---	0019835 // cytolysis // inferred from electronic annotation	0004872 // receptor activity // inferred from electronic annotation /// 0004872 // receptor activity // traceable author statement	17	17q	5.34846e+07
236798_at			0.018	0.955	7.2	7.5	-0.4	0.757858		---	---	---	---	---	---	3	3q	1.83174e+08
230112_at			0.02	0.955	3.6	4	-0.4	0.757858		2012-03-04	2012-03-04	membrane-associated ring finger (C3HC4) 4	---	---	0008270 // zinc ion binding // inferred from electronic annotation /// 0016874 // ligase activity // inferred from electronic annotation /// 0046872 // metal ion binding // inferred from electronic annotation	2	2q	2.1718e+08
227560_at			0.021	0.955	5.2	5.5	-0.4	0.757858		SFXN2	SFXN2	sideroflexin 2	---	0006810 // transport // inferred from electronic annotation /// 0006811 // ion transport // inferred from electronic annotation /// 0006812 // cation transport // inferred from electronic annotation /// 0006826 // iron ion transport // inferred from electronic annotation /// 0055085 // transmembrane transport // inferred from electronic annotation	0008324 // cation transmembrane transporter activity // inferred from electronic annotation	10	10q	1.04498e+08
206762_at			0.022	0.955	3.1	3.5	-0.4	0.757858		KCNA5	KCNA5	potassium voltage-gated channel. shaker-related subfamily. member 5	---	0001666 // response to hypoxia // inferred from electronic annotation /// 0006810 // transport // inferred from electronic annotation /// 0006811 // ion transport // inferred from electronic annotation /// 0006813 // potassium ion transport // traceable author statement /// 0006813 // potassium ion transport // inferred from electronic annotation /// 0042391 // regulation of membrane potential //…	0005216 // ion channel activity // inferred from electronic annotation /// 0005244 // voltage-gated ion channel activity // inferred from electronic annotation /// 0005249 // voltage-gated potassium channel activity // inferred from electronic annotation /// 0005251 // delayed rectifier potassium channel activity // traceable author statement /// 0005267 // potassium channel activity // inferred …	12	12p	5154533
232501_at			0.022	0.955	3.7	4.1	-0.4	0.757858		---	---	---	---	---	---	4	4q	141784038
1552330_at			0.023	0.955	5.4	5.8	-0.4	0.757858		CENPBD1	CENPBD1	CENPB DNA-binding domains containing 1	---	0045449 // regulation of transcription // inferred from electronic annotation	0003677 // DNA binding // inferred from electronic annotation	16	16q	89807822
227290_at			0.024	0.955	5.3	5.7	-0.4	0.757858		---	---	---	---	---	---	16	16q	80632823
229770_at			0.027	0.955	3.8	4.2	-0.4	0.757858		GLT1D1	GLT1D1	glycosyltransferase 1 domain containing 1	---	0009058 // biosynthetic process // inferred from electronic annotation	0016740 // transferase activity // inferred from electronic annotation /// 0016757 // transferase activity. transferring glycosyl groups // inferred from electronic annotation	12	12q	1.29469e+08
233792_at			0.027	0.955	2	2.4	-0.4	0.757858		---	---	---	---	---	---	1	1p	7.28128e+07
226313_at			0.028	0.955	4.8	5.2	-0.4	0.757858		C10orf35	C10orf35	chromosome 10 open reading frame 35	---	---	---	10	10q	7.13918e+07
208189_s_at			0.028	0.955	4.8	5.3	-0.4	0.757858		MYO7A	MYO7A	myosin VIIA	---	0001845 // phagolysosome assembly // inferred from electronic annotation /// 0006909 // phagocytosis // inferred from electronic annotation /// 0007040 // lysosome organization // inferred from direct assay /// 0007600 // sensory perception // inferred from electronic annotation /// 0007601 // visual perception // inferred from mutant phenotype /// 0007601 // visual perception // inferred from el…	0000146 // microfilament motor activity // non-traceable author statement /// 0000166 // nucleotide binding // inferred from electronic annotation /// 0003774 // motor activity // non-traceable author statement /// 0003774 // motor activity // inferred from reviewed computational analysis /// 0003774 // motor activity // inferred from electronic annotation /// 0003779 // actin binding // inferred…	11	11q	76882796
244732_at			0.029	0.955	4.2	4.6	-0.4	0.757858		---	---	---	---	---	---	2	2q	204103637
214889_at			0.03	0.955	5.4	5.9	-0.4	0.757858		FAM149A	FAM149A	family with sequence similarity 149. member A	---	---	---	4	4q	1.87084e+08
220142_at			0.03	0.955	3.9	4.3	-0.4	0.757858		HAPLN2	HAPLN2	hyaluronan and proteoglycan link protein 2	---	0007155 // cell adhesion // inferred from electronic annotation	0005488 // binding // inferred from electronic annotation /// 0005540 // hyaluronic acid binding // inferred from electronic annotation	1	1q	156592301
243909_x_at			0.031	0.955	3.9	4.3	-0.4	0.757858		GUSBP4	GUSBP4	glucuronidase. beta pseudogene 4	---	---	---	5	5p	2.14747e+07
221552_at			0.032	0.955	6	6.4	-0.4	0.757858		ABHD6	ABHD6	abhydrolase domain containing 6	---	---	0003824 // catalytic activity // inferred from electronic annotation /// 0016787 // hydrolase activity // inferred from electronic annotation /// 0047372 // acylglycerol lipase activity // inferred from electronic annotation	3	3p	58252007
213174_at			0.033	0.955	4.9	5.3	-0.4	0.757858		TTC9	TTC9	tetratricopeptide repeat domain 9	---	0006457 // protein folding // inferred from electronic annotation	0005488 // binding // inferred from electronic annotation	14	14q	7.11252e+07
228747_at			0.034	0.955	4.4	4.8	-0.4	0.757858		SEC61A2	SEC61A2	Sec61 alpha 2 subunit (S. cerevisiae)	---	0006810 // transport // inferred from electronic annotation /// 0015031 // protein transport // inferred from electronic annotation /// 0055085 // transmembrane transport // inferred from electronic annotation	0015450 // P-P-bond-hydrolysis-driven protein transmembrane transporter activity // inferred from electronic annotation /// 0043022 // ribosome binding // inferred from electronic annotation	10	10p	1.22072e+07
226248_s_at			0.034	0.955	3.4	3.9	-0.4	0.757858		KIAA1324	KIAA1324	KIAA1324	---	---	0005515 // protein binding // inferred from electronic annotation	1	1p	109740570
1556064_at			0.036	0.955	4.8	5.2	-0.4	0.757858		LOC284926	LOC284926	hypothetical protein LOC284926	---	---	---	22	22q	46647667
230519_at			0.037	0.955	4.6	4.9	-0.4	0.757858		FAM124A	FAM124A	family with sequence similarity 124A	---	---	---	13	13q	51857691
203256_at			0.039	0.955	4.5	4.9	-0.4	0.757858		CDH3	CDH3	cadherin 3. type 1. P-cadherin (placental)	---	0007155 // cell adhesion // traceable author statement /// 0007155 // cell adhesion // inferred from electronic annotation /// 0007156 // homophilic cell adhesion // inferred from electronic annotation /// 0007601 // visual perception // inferred from electronic annotation /// 0016337 // cell-cell adhesion // inferred from electronic annotation /// 0042060 // wound healing // inferred from electr…	0005509 // calcium ion binding // inferred from electronic annotation	16	16q	68706080
232579_at			0.039	0.955	4.2	4.6	-0.4	0.757858		LOC100134229	LOC100134229	hypothetical LOC100134229	---	---	---	7	7q	1.39878e+08
237060_at			0.04	0.955	3	3.4	-0.4	0.757858		---	---	---	---	---	---	1	1p	29062875
210773_s_at			0.041	0.955	3.5	3.9	-0.4	0.757858		FPR2	FPR2	formyl peptide receptor 2	GPCRDB_Class_A_Rhodopsin-like // GenMAPP /// Peptide_GPCRs // GenMAPP	0006928 // cellular component movement // traceable author statement /// 0006935 // chemotaxis // inferred from electronic annotation /// 0006935 // chemotaxis // traceable author statement /// 0006954 // inflammatory response // traceable author statement /// 0007155 // cell adhesion // traceable author statement /// 0007165 // signal transduction // inferred from electronic annotation /// 00071…	0004871 // signal transducer activity // inferred from electronic annotation /// 0004872 // receptor activity // inferred from electronic annotation /// 0004930 // G-protein coupled receptor activity // inferred from electronic annotation /// 0004930 // G-protein coupled receptor activity // traceable author statement /// 0004982 // N-formyl peptide receptor activity // inferred from electronic a…	19	19q	5.22724e+07
217540_at			0.041	0.955	4.8	5.2	-0.4	0.757858		FAM55C	FAM55C	family with sequence similarity 55. member C	---	---	---	3	3q	1.01544e+08
236042_at			0.042	0.955	3.9	4.3	-0.4	0.757858		LOC100130219	LOC100130219	hypothetical LOC100130219	---	---	---	12	12p	1.08465e+06
49111_at			0.042	0.955	4.8	5.2	-0.4	0.757858		---	---	---	---	---	---	11	11q	7.49716e+07
209425_at			0.045	0.955	5.4	5.8	-0.4	0.757858		AMACR	AMACR	alpha-methylacyl-CoA racemase	---	0006699 // bile acid biosynthetic process // inferred from electronic annotation /// 0008152 // metabolic process // inferred from electronic annotation /// 0008206 // bile acid metabolic process // inferred from electronic annotation /// 0044255 // cellular lipid metabolic process // not recorded	0003824 // catalytic activity // inferred from electronic annotation /// 0008111 // alpha-methylacyl-CoA racemase activity // inferred from electronic annotation /// 0016853 // isomerase activity // inferred from electronic annotation	5	5p	33997653
219630_at			0.045	0.955	2.9	3.3	-0.4	0.757858		PDZK1IP1	PDZK1IP1	PDZK1 interacting protein 1	---	---	---	1	1p	47652496
241500_at			0.045	0.955	2	2.4	-0.4	0.757858		CDH8	CDH8	cadherin 8. type 2	---	0007155 // cell adhesion // inferred from electronic annotation /// 0007155 // cell adhesion // traceable author statement /// 0007156 // homophilic cell adhesion // inferred from electronic annotation	0005509 // calcium ion binding // inferred from electronic annotation	16	16q	61686113
212960_at			0.046	0.955	4	4.4	-0.4	0.757858		TBC1D9	TBC1D9	TBC1 domain family. member 9 (with GRAM domain)	---	0032313 // regulation of Rab GTPase activity // inferred from electronic annotation	0005096 // GTPase activator activity // inferred from electronic annotation /// 0005097 // Rab GTPase activator activity // inferred from electronic annotation /// 0005509 // calcium ion binding // inferred from electronic annotation	4	4q	1.41567e+08
45288_at			0.046	0.955	5.8	6.1	-0.4	0.757858		ABHD6	ABHD6	abhydrolase domain containing 6	---	---	0003824 // catalytic activity // inferred from electronic annotation /// 0016787 // hydrolase activity // inferred from electronic annotation /// 0047372 // acylglycerol lipase activity // inferred from electronic annotation	3	3p	5.82667e+07
209426_s_at			0.046	0.955	5.2	5.6	-0.4	0.757858		AMACR	AMACR /// C1QTNF3	alpha-methylacyl-CoA racemase /// C1q and tumor necrosis factor related protein 3	---	0006699 // bile acid biosynthetic process // inferred from electronic annotation /// 0008152 // metabolic process // inferred from electronic annotation /// 0008206 // bile acid metabolic process // inferred from electronic annotation /// 0044255 // cellular lipid metabolic process // not recorded	0003824 // catalytic activity // inferred from electronic annotation /// 0008111 // alpha-methylacyl-CoA racemase activity // inferred from electronic annotation /// 0016853 // isomerase activity // inferred from electronic annotation	5	5p	3.39983e+07
208707_at			0.046	0.955	5.6	6	-0.4	0.757858		EIF5	EIF5	eukaryotic translation initiation factor 5	Translation_Factors // GenMAPP	0006412 // translation // inferred from electronic annotation /// 0006413 // translational initiation // non-traceable author statement /// 0006413 // translational initiation // inferred from electronic annotation /// 0006446 // regulation of translational initiation // traceable author statement /// 0016070 // RNA metabolic process // inferred from electronic annotation	0000166 // nucleotide binding // inferred from electronic annotation /// 0003743 // translation initiation factor activity // non-traceable author statement /// 0003743 // translation initiation factor activity // inferred from electronic annotation /// 0003924 // GTPase activity // traceable author statement /// 0005488 // binding // inferred from electronic annotation /// 0005515 // protein bin…	14	14q	103805862
209369_at			0.047	0.955	2.3	2.7	-0.4	0.757858		ANXA3	ANXA3	annexin A3	Prostaglandin_synthesis_regulation // GenMAPP	0006909 // phagocytosis // inferred from direct assay /// 0010595 // positive regulation of endothelial cell migration // inferred from direct assay /// 0021766 // hippocampus development // inferred from electronic annotation /// 0031100 // organ regeneration // inferred from electronic annotation /// 0042742 // defense response to bacterium // inferred from direct assay /// 0043312 // neutrophi…	0004859 // phospholipase inhibitor activity // inferred from electronic annotation /// 0005509 // calcium ion binding // inferred from electronic annotation /// 0005544 // calcium-dependent phospholipid binding // inferred from direct assay /// 0005544 // calcium-dependent phospholipid binding // inferred from electronic annotation /// 0019834 // phospholipase A2 inhibitor activity // inferred fr…	4	4q	79503560
219271_at			0.047	0.955	3.5	4	-0.4	0.757858		GALNT14	GALNT14	UDP-N-acetyl-alpha-D-galactosamine:polypeptide N-acetylgalactosaminyltransferase 14 (GalNAc-T14)	---	---	0004653 // polypeptide N-acetylgalactosaminyltransferase activity // inferred from electronic annotation /// 0005529 // sugar binding // inferred from electronic annotation /// 0016740 // transferase activity // inferred from electronic annotation /// 0016757 // transferase activity. transferring glycosyl groups // inferred from electronic annotation	2	2p	31247173
212233_at			0.048	0.955	11	11.3	-0.4	0.757858		MAP1B	MAP1B	microtubule-associated protein 1B	---	0001578 // microtubule bundle formation // inferred from electronic annotation /// 0007026 // negative regulation of microtubule depolymerization // inferred from electronic annotation /// 0007399 // nervous system development // inferred from electronic annotation /// 0007416 // synapse assembly // inferred from electronic annotation /// 0007417 // central nervous system development // inferred …	0003779 // actin binding // inferred from electronic annotation /// 0005198 // structural molecule activity // non-traceable author statement /// 0005515 // protein binding // inferred from physical interaction /// 0005515 // protein binding // inferred from electronic annotation /// 0005543 // phospholipid binding // inferred from electronic annotation /// 0008017 // microtubule binding // infer…	5	5q	7.15046e+07
219051_x_at			0.049	0.955	7.8	8.2	-0.4	0.757858		METRN	METRN	meteorin. glial cell differentiation regulator	---	0007275 // multicellular organismal development // inferred from electronic annotation /// 0007399 // nervous system development // inferred from electronic annotation /// 0010001 // glial cell differentiation // inferred from electronic annotation /// 0030154 // cell differentiation // inferred from electronic annotation /// 0050772 // positive regulation of axonogenesis // inferred from electro…	---	16	16p	766324
215211_at			0.049	0.955	4.1	4.4	-0.4	0.757858		RRN3P1	RRN3P1	RNA polymerase I transcription factor homolog (S. cerevisiae) pseudogene 1	---	---	---	16	16p	21806365
224801_at			0.049	0.955	7.3	7.7	-0.4	0.757858		NDFIP2	NDFIP2	Nedd4 family interacting protein 2	---	0010629 // negative regulation of gene expression // inferred from mutant phenotype /// 0031398 // positive regulation of protein ubiquitination // inferred from mutant phenotype /// 0032410 // negative regulation of transporter activity // inferred from mutant phenotype /// 0043123 // positive regulation of I-kappaB kinase/NF-kappaB cascade // inferred from mutant phenotype /// 0051224 // negati…	0004871 // signal transducer activity // inferred from mutant phenotype /// 0005515 // protein binding // inferred from physical interaction /// 0050699 // WW domain binding // inferred from physical interaction	13	13q	8.00928e+07
244886_at			0	0.955	2.7	3	-0.3	0.812252		---	---	---	---	---	---	8	8p	2.30833e+07
243623_at			0.001	0.955	2.9	3.2	-0.3	0.812252		SLC1A7	SLC1A7	solute carrier family 1 (glutamate transporter). member 7	---	0006810 // transport // inferred from electronic annotation /// 0006835 // dicarboxylic acid transport // traceable author statement /// 0006835 // dicarboxylic acid transport // inferred from electronic annotation	0005313 // L-glutamate transmembrane transporter activity // traceable author statement /// 0015293 // symporter activity // inferred from electronic annotation /// 0017153 // sodium:dicarboxylate symporter activity // inferred from electronic annotation	1	1p	5.35531e+07
1556560_a_at			0.001	0.955	4.6	5	-0.3	0.812252		LOC100128071	LOC100128071	similar to hCG41624	---	---	---	1	1p	32828015
1562834_at			0.001	0.955	3	3.3	-0.3	0.812252		---	---	---	---	---	---	15	15q	4.06674e+07
230268_at			0.002	0.955	3.3	3.5	-0.3	0.812252		---	---	---	---	---	---	1	1q	231153606
241887_at			0.002	0.955	3.9	4.2	-0.3	0.812252		---	---	---	---	---	---	8	8q	74700729
209441_at			0.002	0.955	5.5	5.7	-0.3	0.812252		RHOBTB2	RHOBTB2	Rho-related BTB domain containing 2	---	0007264 // small GTPase mediated signal transduction // inferred from electronic annotation	0000166 // nucleotide binding // inferred from electronic annotation /// 0005515 // protein binding // inferred from electronic annotation /// 0005525 // GTP binding // inferred from electronic annotation	8	8p	2.28676e+07
1555255_a_at			0.002	0.955	4.7	5	-0.3	0.812252		PPIP5K1	PPIP5K1	diphosphoinositol pentakisphosphate kinase 1	---	0006020 // inositol metabolic process // inferred from direct assay	0000166 // nucleotide binding // inferred from electronic annotation /// 0000827 // inositol 1.3.4.5.6-pentakisphosphate kinase activity // inferred from direct assay /// 0000832 // inositol hexakisphosphate 5-kinase activity // inferred from direct assay /// 0003993 // acid phosphatase activity // inferred from electronic annotation /// 0005524 // ATP binding // inferred from electronic annotati…	15	15q	4.38515e+07
235747_at			0.002	0.955	5.9	6.2	-0.3	0.812252		SLC25A16	SLC25A16	Solute carrier family 25 (mitochondrial carrier; Graves disease autoantigen). member 16	---	0006810 // transport // non-traceable author statement /// 0006810 // transport // inferred from electronic annotation /// 0055085 // transmembrane transport // inferred from electronic annotation	0005488 // binding // inferred from electronic annotation /// 0015300 // solute:solute antiporter activity // non-traceable author statement	10	10q	70238090
1554800_at			0.002	0.955	3.1	3.4	-0.3	0.812252		RAB39	RAB39	RAB39. member RAS oncogene family	---	0006810 // transport // inferred from electronic annotation /// 0007264 // small GTPase mediated signal transduction // inferred from electronic annotation /// 0015031 // protein transport // inferred from electronic annotation	0000166 // nucleotide binding // inferred from electronic annotation /// 0005525 // GTP binding // non-traceable author statement /// 0005525 // GTP binding // inferred from electronic annotation	11	11q	107816741
220128_s_at			0.003	0.955	4.5	4.9	-0.3	0.812252		NIPAL2	NIPAL2	NIPA-like domain containing 2	---	---	---	8	8q	9.92555e+07
1559322_at			0.003	0.955	1.7	2	-0.3	0.812252		LOC727916	LOC727916	hypothetical protein LOC727916	---	---	---	6	6q	64281614
223728_at			0.003	0.955	5.9	6.2	-0.3	0.812252		CENPBD1	CENPBD1	CENPB DNA-binding domains containing 1	---	0045449 // regulation of transcription // inferred from electronic annotation	0003677 // DNA binding // inferred from electronic annotation	16	16q	90036730
1552793_at			0.004	0.955	3	3.3	-0.3	0.812252		C8orf31	C8orf31	chromosome 8 open reading frame 31	---	---	---	8	8q	144128199
222930_s_at			0.004	0.955	3.3	3.5	-0.3	0.812252		AGMAT	AGMAT	agmatine ureohydrolase (agmatinase)	---	0006596 // polyamine biosynthetic process // inferred from electronic annotation /// 0008295 // spermidine biosynthetic process // inferred from electronic annotation /// 0009446 // putrescine biosynthetic process // inferred from electronic annotation	0008783 // agmatinase activity // inferred from electronic annotation /// 0016787 // hydrolase activity // inferred from electronic annotation /// 0016813 // hydrolase activity. acting on carbon-nitrogen (but not peptide) bonds. in linear amidines // inferred from electronic annotation /// 0046872 // metal ion binding // inferred from electronic annotation	1	1p	15905826
234998_at			0.004	0.955	6.6	6.9	-0.3	0.812252		RAB11A	RAB11A	RAB11A. member RAS oncogene family	---	0000910 // cytokinesis // inferred from mutant phenotype /// 0006184 // GTP catabolic process // inferred from electronic annotation /// 0006810 // transport // inferred from electronic annotation /// 0007049 // cell cycle // inferred from electronic annotation /// 0007264 // small GTPase mediated signal transduction // inferred from electronic annotation /// 0015031 // protein transport // infer…	0000166 // nucleotide binding // inferred from electronic annotation /// 0003924 // GTPase activity // inferred from direct assay /// 0005515 // protein binding // inferred from physical interaction /// 0005525 // GTP binding // inferred from electronic annotation /// 0019905 // syntaxin binding // non-traceable author statement	15	15q	66183458
222811_at			0.005	0.955	7.5	7.8	-0.3	0.812252		FTSJD1	FTSJD1	FtsJ methyltransferase domain containing 1	---	0032259 // methylation // inferred from electronic annotation	0003676 // nucleic acid binding // inferred from electronic annotation /// 0008168 // methyltransferase activity // inferred from electronic annotation /// 0016740 // transferase activity // inferred from electronic annotation	16	16q	7.13181e+07
208352_x_at			0.006	0.955	3.4	3.8	-0.3	0.812252		ANK1	ANK1	ankyrin 1. erythrocytic	---	0006887 // exocytosis // non-traceable author statement /// 0007010 // cytoskeleton organization // non-traceable author statement /// 0007165 // signal transduction // inferred from electronic annotation /// 0045199 // maintenance of epithelial cell apical/basal polarity // traceable author statement	0005198 // structural molecule activity // non-traceable author statement /// 0005200 // structural constituent of cytoskeleton // traceable author statement /// 0005515 // protein binding // inferred from physical interaction /// 0005515 // protein binding // inferred from electronic annotation /// 0008093 // cytoskeletal adaptor activity // inferred from direct assay /// 0008093 // cytoskeletal…	8	8p	4.15178e+07
237393_at			0.007	0.955	3.1	3.4	-0.3	0.812252		LOC441617	LOC441617	hypothetical LOC441617	---	---	---	11	11q	74954541
221859_at			0.007	0.955	2.7	3	-0.3	0.812252		SYT13	SYT13	synaptotagmin XIII	---	0016192 // vesicle-mediated transport // inferred from electronic annotation	---	11	11p	45284799
221880_s_at			0.007	0.955	3.8	4.1	-0.3	0.812252		FAM174B	FAM174B	family with sequence similarity 174. member B	---	---	---	15	15q	9.31613e+07
1557729_at			0.008	0.955	3.1	3.4	-0.3	0.812252		GRK5	GRK5	G protein-coupled receptor kinase 5	Calcium_regulation_in_cardiac_cells // GenMAPP /// Smooth_muscle_contraction // GenMAPP	0006468 // protein phosphorylation // inferred from electronic annotation /// 0007165 // signal transduction // inferred from electronic annotation /// 0007188 // G-protein signaling. coupled to cAMP nucleotide second messenger // traceable author statement /// 0007217 // tachykinin receptor signaling pathway // inferred from direct assay /// 0008277 // regulation of G-protein coupled receptor pr…	0000166 // nucleotide binding // inferred from electronic annotation /// 0004672 // protein kinase activity // inferred from electronic annotation /// 0004674 // protein serine/threonine kinase activity // inferred from electronic annotation /// 0004703 // G-protein coupled receptor kinase activity // inferred from electronic annotation /// 0004871 // signal transducer activity // inferred from e…	10	10q	121217942
213739_at			0.008	0.955	4.4	4.8	-0.3	0.812252		---	---	---	---	---	---	10	10q	114585703
1556445_at			0.009	0.955	3.7	4.1	-0.3	0.812252		---	---	---	---	---	---	7	7p	163369
1559201_a_at			0.009	0.955	4	4.2	-0.3	0.812252		---	---	---	---	---	---	9	9q	7.77635e+07
205391_x_at			0.009	0.955	3.4	3.7	-0.3	0.812252		ANK1	ANK1	ankyrin 1. erythrocytic	---	0006887 // exocytosis // non-traceable author statement /// 0007010 // cytoskeleton organization // non-traceable author statement /// 0007165 // signal transduction // inferred from electronic annotation /// 0045199 // maintenance of epithelial cell apical/basal polarity // traceable author statement	0005198 // structural molecule activity // non-traceable author statement /// 0005200 // structural constituent of cytoskeleton // traceable author statement /// 0005515 // protein binding // inferred from physical interaction /// 0005515 // protein binding // inferred from electronic annotation /// 0008093 // cytoskeletal adaptor activity // inferred from direct assay /// 0008093 // cytoskeletal…	8	8p	4.1584e+07
243437_at			0.01	0.955	2.7	2.9	-0.3	0.812252		GCC1	GCC1	GRIP and coiled-coil domain containing 1	---	---	0005515 // protein binding // inferred from physical interaction	7	7q	127225168
237019_at			0.01	0.955	2.6	2.9	-0.3	0.812252		---	---	---	---	---	---	6	6p	20401207
239062_at			0.011	0.955	2.5	2.8	-0.3	0.812252		LOC100131096	LOC100131096	hypothetical LOC100131096	---	---	---	17	17q	7.61049e+07
206212_at			0.011	0.955	3	3.3	-0.3	0.812252		CPA2	CPA2	carboxypeptidase A2 (pancreatic)	---	0006508 // proteolysis // inferred from electronic annotation /// 0007039 // vacuolar protein catabolic process // traceable author statement	0004180 // carboxypeptidase activity // inferred from direct assay /// 0004180 // carboxypeptidase activity // inferred from electronic annotation /// 0004181 // metallocarboxypeptidase activity // inferred from direct assay /// 0004181 // metallocarboxypeptidase activity // inferred from electronic annotation /// 0004181 // metallocarboxypeptidase activity // traceable author statement /// 00055…	7	7q	129918179
207087_x_at			0.011	0.955	3.5	3.8	-0.3	0.812252		ANK1	ANK1	ankyrin 1. erythrocytic	---	0006887 // exocytosis // non-traceable author statement /// 0007010 // cytoskeleton organization // non-traceable author statement /// 0007165 // signal transduction // inferred from electronic annotation /// 0045199 // maintenance of epithelial cell apical/basal polarity // traceable author statement	0005198 // structural molecule activity // non-traceable author statement /// 0005200 // structural constituent of cytoskeleton // traceable author statement /// 0005515 // protein binding // inferred from physical interaction /// 0005515 // protein binding // inferred from electronic annotation /// 0008093 // cytoskeletal adaptor activity // inferred from direct assay /// 0008093 // cytoskeletal…	8	8p	4.15178e+07
213295_at			0.012	0.955	7.2	7.5	-0.3	0.812252		CYLD	CYLD	cylindromatosis (turban tumor syndrome)	---	0006412 // translation // inferred from electronic annotation /// 0006511 // ubiquitin-dependent protein catabolic process // inferred from electronic annotation /// 0007049 // cell cycle // inferred from electronic annotation /// 0007346 // regulation of mitotic cell cycle // inferred from mutant phenotype /// 0016055 // Wnt receptor signaling pathway // inferred from electronic annotation /// 0…	0003735 // structural constituent of ribosome // inferred from electronic annotation /// 0004221 // ubiquitin thiolesterase activity // inferred from electronic annotation /// 0004843 // ubiquitin-specific protease activity // inferred from direct assay /// 0005515 // protein binding // inferred from physical interaction /// 0005515 // protein binding // inferred from electronic annotation /// 00…	16	16q	5.08345e+07
221905_at			0.013	0.955	6.5	6.7	-0.3	0.812252		CYLD	CYLD	cylindromatosis (turban tumor syndrome)	---	0006412 // translation // inferred from electronic annotation /// 0006511 // ubiquitin-dependent protein catabolic process // inferred from electronic annotation /// 0007049 // cell cycle // inferred from electronic annotation /// 0007346 // regulation of mitotic cell cycle // inferred from mutant phenotype /// 0016055 // Wnt receptor signaling pathway // inferred from electronic annotation /// 0…	0003735 // structural constituent of ribosome // inferred from electronic annotation /// 0004221 // ubiquitin thiolesterase activity // inferred from electronic annotation /// 0004843 // ubiquitin-specific protease activity // inferred from direct assay /// 0005515 // protein binding // inferred from physical interaction /// 0005515 // protein binding // inferred from electronic annotation /// 00…	16	16q	5.08043e+07
205663_at			0.013	0.955	3.6	4	-0.3	0.812252		PCBP3	PCBP3	poly(rC) binding protein 3	---	0016071 // mRNA metabolic process // non-traceable author statement	0003677 // DNA binding // inferred from electronic annotation /// 0003723 // RNA binding // non-traceable author statement /// 0003723 // RNA binding // inferred from electronic annotation	21	21q	4.73161e+07
224073_at			0.015	0.955	2.7	3	-0.3	0.812252		FLJ20464	FLJ20464	hypothetical protein FLJ20464	---	---	---	22	22q	3.17436e+07
200954_at			0.015	0.955	8.5	8.7	-0.3	0.812252		ATP6V0C	ATP6V0C	ATPase. H+ transporting. lysosomal 16kDa. V0 subunit c	---	0006810 // transport // inferred from electronic annotation /// 0006811 // ion transport // inferred from electronic annotation /// 0015986 // ATP synthesis coupled proton transport // inferred from electronic annotation /// 0015992 // proton transport // traceable author statement /// 0015992 // proton transport // inferred from electronic annotation /// 0044419 // interspecies interaction betwe…	0005515 // protein binding // inferred from physical interaction /// 0015078 // hydrogen ion transmembrane transporter activity // inferred from electronic annotation /// 0046933 // hydrogen ion transporting ATP synthase activity. rotational mechanism // traceable author statement /// 0046961 // proton-transporting ATPase activity. rotational mechanism // traceable author statement	16	16p	2567041
207592_s_at			0.015	0.955	2.7	2.9	-0.3	0.812252		HCN2	HCN2	hyperpolarization activated cyclic nucleotide-gated potassium channel 2	---	0006810 // transport // inferred from electronic annotation /// 0006811 // ion transport // inferred from electronic annotation /// 0006812 // cation transport // traceable author statement /// 0006813 // potassium ion transport // inferred from electronic annotation /// 0006814 // sodium ion transport // inferred from electronic annotation /// 0006936 // muscle contraction // traceable author st…	0000166 // nucleotide binding // inferred from electronic annotation /// 0005216 // ion channel activity // inferred from electronic annotation /// 0005244 // voltage-gated ion channel activity // inferred from electronic annotation /// 0005249 // voltage-gated potassium channel activity // inferred from electronic annotation /// 0005261 // cation channel activity // traceable author statement //…	15	15q	3.26063e+07
241684_at			0.017	0.955	2.9	3.1	-0.3	0.812252		---	---	---	---	---	---	17	17q	4.09036e+07
230819_at			0.017	0.955	4.2	4.5	-0.3	0.812252		C2CD4C	C2CD4C	C2 calcium-dependent domain containing 4C	---	---	---	19	19p	406131
230013_s_at			0.018	0.955	3.4	3.7	-0.3	0.812252		ARHGAP23	ARHGAP23	Rho GTPase activating protein 23	---	0007165 // signal transduction // inferred from electronic annotation	0005096 // GTPase activator activity // inferred from electronic annotation /// 0005515 // protein binding // inferred from electronic annotation	17	17q	36657010
238753_at			0.02	0.955	5.5	5.9	-0.3	0.812252		NCS1	NCS1	neuronal calcium sensor 1	---	0010975 // regulation of neuron projection development // inferred from sequence or structural similarity /// 0010975 // regulation of neuron projection development // inferred from electronic annotation /// 0045921 // positive regulation of exocytosis // inferred from electronic annotation /// 0048015 // phosphoinositide-mediated signaling // inferred from electronic annotation /// 0051927 // ne…	0005509 // calcium ion binding // traceable author statement /// 0005509 // calcium ion binding // inferred from electronic annotation /// 0005515 // protein binding // inferred from physical interaction /// 0005515 // protein binding // inferred from electronic annotation	9	9q	1.32999e+08
212906_at			0.02	0.955	6	6.4	-0.3	0.812252		GRAMD1B	GRAMD1B	GRAM domain containing 1B	---	---	---	11	11q	1.23465e+08
1559526_at			0.02	0.955	2.5	2.8	-0.3	0.812252		---	---	---	---	---	---	10	10p	675394
226638_at			0.021	0.955	6.8	7.1	-0.3	0.812252		ARHGAP23	ARHGAP23	Rho GTPase activating protein 23	---	0007165 // signal transduction // inferred from electronic annotation	0005096 // GTPase activator activity // inferred from electronic annotation /// 0005515 // protein binding // inferred from electronic annotation	17	17q	36667909
224260_at			0.021	0.955	3.8	4.1	-0.3	0.812252		---	---	---	---	---	0005515 // protein binding // inferred from physical interaction	9	9q	134374879
1559009_at			0.021	0.955	2.2	2.5	-0.3	0.812252		---	---	---	---	---	---	14	14q	8.16882e+07
227669_at			0.021	0.955	6.4	6.7	-0.3	0.812252		BRP44	BRP44	brain protein 44	---	---	---	1	1q	1.67886e+08
223124_s_at			0.023	0.955	8.1	8.4	-0.3	0.812252		C1orf128	C1orf128	chromosome 1 open reading frame 128	---	---	---	1	1p	2.41098e+07
227899_at			0.023	0.955	2.4	2.7	-0.3	0.812252		VIT	VIT	vitrin	---	0010811 // positive regulation of cell-substrate adhesion // inferred from electronic annotation /// 0030198 // extracellular matrix organization // inferred from electronic annotation	0005539 // glycosaminoglycan binding // inferred from electronic annotation	2	2p	3.69829e+07
217606_at			0.023	0.955	4.7	4.9	-0.3	0.812252		---	---	---	---	---	---	2	2q	1.18773e+08
1560156_at			0.024	0.955	4.4	4.7	-0.3	0.812252		---	---	---	---	---	---	12	12p	9813676
229952_at			0.024	0.955	3.5	3.8	-0.3	0.812252		---	---	---	---	---	---	14	14q	65216492
211056_s_at			0.024	0.955	5	5.4	-0.3	0.812252		SRD5A1	SRD5A1	steroid-5-alpha-reductase. alpha polypeptide 1 (3-oxo-5 alpha-steroid delta 4-dehydrogenase alpha 1)	---	0006629 // lipid metabolic process // inferred from electronic annotation /// 0006702 // androgen biosynthetic process // inferred from electronic annotation /// 0007530 // sex determination // non-traceable author statement /// 0007548 // sex differentiation // inferred from electronic annotation /// 0008202 // steroid metabolic process // not recorded /// 0008202 // steroid metabolic process //…	0003865 // 3-oxo-5-alpha-steroid 4-dehydrogenase activity // inferred from direct assay /// 0003865 // 3-oxo-5-alpha-steroid 4-dehydrogenase activity // inferred from electronic annotation /// 0009055 // electron carrier activity // traceable author statement /// 0016491 // oxidoreductase activity // inferred from electronic annotation /// 0016627 // oxidoreductase activity. acting on the CH-CH g…	5	5p	6651545
216467_s_at			0.024	0.955	3.5	3.8	-0.3	0.812252		---	---	---	---	---	---	6	6q	146197171
217904_s_at			0.025	0.955	7.9	8.3	-0.3	0.812252		BACE1	BACE1	beta-site APP-cleaving enzyme 1	---	0006508 // proteolysis // inferred from direct assay /// 0006508 // proteolysis // inferred from electronic annotation /// 0006509 // membrane protein ectodomain proteolysis // traceable author statement /// 0050435 // beta-amyloid metabolic process // inferred from direct assay	0004175 // endopeptidase activity // inferred from electronic annotation /// 0004190 // aspartic-type endopeptidase activity // inferred from direct assay /// 0004190 // aspartic-type endopeptidase activity // inferred from electronic annotation /// 0005515 // protein binding // inferred from physical interaction /// 0008233 // peptidase activity // inferred from electronic annotation /// 0008798…	11	11q	1.17172e+08
230974_at			0.026	0.955	5.6	6	-0.3	0.812252		DDX19B	DDX19B	DEAD (Asp-Glu-Ala-As) box polypeptide 19B	---	0006406 // mRNA export from nucleus // traceable author statement /// 0006810 // transport // inferred from electronic annotation /// 0015031 // protein transport // inferred from electronic annotation /// 0051028 // mRNA transport // inferred from electronic annotation /// 0055085 // transmembrane transport // inferred from electronic annotation	0000166 // nucleotide binding // inferred from electronic annotation /// 0003676 // nucleic acid binding // inferred from electronic annotation /// 0003723 // RNA binding // inferred from electronic annotation /// 0003723 // RNA binding // traceable author statement /// 0004386 // helicase activity // inferred from electronic annotation /// 0004386 // helicase activity // traceable author stateme…	16	16q	70368940
205984_at			0.026	0.955	2.1	2.5	-0.3	0.812252		CRHBP	CRHBP	corticotropin releasing hormone binding protein	---	0007165 // signal transduction // traceable author statement /// 0007565 // female pregnancy // traceable author statement /// 0007611 // learning or memory // traceable author statement /// 0042445 // hormone metabolic process // inferred from electronic annotation	0017047 // adrenocorticotropin-releasing hormone binding // inferred from electronic annotation	5	5q	7.62569e+07
221041_s_at			0.026	0.955	6.3	6.6	-0.3	0.812252		SLC17A5	SLC17A5	solute carrier family 17 (anion/sugar transporter). member 5	---	0006810 // transport // inferred from electronic annotation /// 0006820 // anion transport // traceable author statement /// 0008643 // carbohydrate transport // inferred from electronic annotation /// 0015739 // sialic acid transport // inferred from direct assay /// 0015739 // sialic acid transport // inferred from electronic annotation /// 0055085 // transmembrane transport // inferred from el…	0005351 // sugar:hydrogen symporter activity // traceable author statement /// 0015136 // sialic acid transmembrane transporter activity // inferred from direct assay /// 0015136 // sialic acid transmembrane transporter activity // inferred from electronic annotation /// 0015293 // symporter activity // inferred from electronic annotation	6	6q	7.4334e+07
218297_at			0.027	0.955	6.3	6.6	-0.3	0.812252		FAM188A	FAM188A	family with sequence similarity 188. member A	---	0006915 // apoptosis // inferred from electronic annotation	0005509 // calcium ion binding // inferred from electronic annotation	10	10p	1.58613e+07
239105_at			0.027	0.955	3.5	3.8	-0.3	0.812252		---	---	---	---	---	---	14	14q	71373650
236329_at			0.027	0.955	3.2	3.5	-0.3	0.812252		FLJ33996	FLJ33996	hypothetical protein FLJ33996	---	---	---	12	12q	52205033
226249_at			0.028	0.955	6.7	7.1	-0.3	0.812252		SNX30	SNX30	sorting nexin family member 30	---	0006810 // transport // inferred from electronic annotation /// 0007154 // cell communication // inferred from electronic annotation /// 0015031 // protein transport // inferred from electronic annotation	0005515 // protein binding // inferred from electronic annotation /// 0035091 // phosphoinositide binding // inferred from electronic annotation	9	9q	115636003
236786_at			0.028	0.955	3.1	3.4	-0.3	0.812252		FAM135B	FAM135B	family with sequence similarity 135. member B	---	---	---	8	8q	1.39148e+08
235761_at			0.029	0.955	2.2	2.5	-0.3	0.812252		---	---	---	---	---	---	22	22q	2.692e+07
236142_at			0.029	0.955	2.6	2.9	-0.3	0.812252		PPIH	PPIH	Peptidylprolyl isomerase H (cyclophilin H)	---	0000398 // nuclear mRNA splicing. via spliceosome // inferred by curator /// 0006397 // mRNA processing // inferred from electronic annotation /// 0006457 // protein folding // inferred from electronic annotation /// 0006457 // protein folding // traceable author statement /// 0006461 // protein complex assembly // traceable author statement /// 0008380 // RNA splicing // inferred from electronic…	0003755 // peptidyl-prolyl cis-trans isomerase activity // inferred from direct assay /// 0003755 // peptidyl-prolyl cis-trans isomerase activity // inferred from electronic annotation /// 0005515 // protein binding // inferred from physical interaction /// 0016018 // cyclosporin A binding // traceable author statement /// 0016853 // isomerase activity // inferred from electronic annotation /// 0…	1	1p	43147079
238250_at			0.029	0.955	2.4	2.7	-0.3	0.812252		---	---	---	---	---	---	1	1q	2.06808e+08
202034_x_at			0.03	0.955	7.7	7.9	-0.3	0.812252		RB1CC1	RB1CC1	RB1-inducible coiled-coil 1	---	0000045 // autophagic vacuole assembly // inferred from electronic annotation /// 0001889 // liver development // inferred from electronic annotation /// 0001934 // positive regulation of protein phosphorylation // inferred from electronic annotation /// 0006350 // transcription // inferred from electronic annotation /// 0006914 // autophagy // inferred from electronic annotation /// 0007049 // c…	0005515 // protein binding // inferred from physical interaction /// 0005515 // protein binding // inferred from electronic annotation /// 0016301 // kinase activity // inferred from electronic annotation	8	8q	5.3581e+07
230678_at			0.03	0.955	3.3	3.6	-0.3	0.812252		LOC100505773	LOC100505773	hypothetical LOC100505773	---	---	---	1	1q	1.63215e+08
232252_at			0.03	0.955	2.7	3	-0.3	0.812252		DUSP27	DUSP27	dual specificity phosphatase 27 (putative)	---	0006470 // protein dephosphorylation // inferred from electronic annotation /// 0016311 // dephosphorylation // inferred from electronic annotation	0008138 // protein tyrosine/serine/threonine phosphatase activity // inferred from electronic annotation /// 0016791 // phosphatase activity // inferred from electronic annotation	1	1q	167097114
221053_s_at			0.03	0.955	2.9	3.3	-0.3	0.812252		TDRKH	TDRKH	tudor and KH domain containing	---	---	0003676 // nucleic acid binding // inferred from electronic annotation /// 0003723 // RNA binding // inferred from electronic annotation	1	1q	151753520
226167_at			0.031	0.955	4.2	4.6	-0.3	0.812252		SYT7	SYT7	synaptotagmin VII	---	0001778 // plasma membrane repair // inferred from electronic annotation /// 0006810 // transport // inferred from electronic annotation /// 0017158 // regulation of calcium ion-dependent exocytosis // inferred from electronic annotation /// 0050796 // regulation of insulin secretion // inferred from electronic annotation	0005215 // transporter activity // inferred from electronic annotation /// 0005509 // calcium ion binding // inferred from electronic annotation /// 0046872 // metal ion binding // inferred from electronic annotation	11	11q	61284003
226924_at			0.033	0.955	7	7.3	-0.3	0.812252		LOC400657	LOC400657	hypothetical LOC400657	---	---	---	18	18q	72262552
242442_x_at			0.033	0.955	3.5	3.8	-0.3	0.812252		RG9MTD2	RG9MTD2	RNA (guanine-9-) methyltransferase domain containing 2	---	---	0008168 // methyltransferase activity // inferred from electronic annotation /// 0016740 // transferase activity // inferred from electronic annotation	4	4q	100468434
201140_s_at			0.033	0.955	7.3	7.6	-0.3	0.812252		RAB5C	RAB5C	RAB5C. member RAS oncogene family	---	0006810 // transport // inferred from electronic annotation /// 0007032 // endosome organization // inferred from electronic annotation /// 0007264 // small GTPase mediated signal transduction // inferred from electronic annotation /// 0015031 // protein transport // inferred from electronic annotation /// 0030100 // regulation of endocytosis // inferred from electronic annotation	0000166 // nucleotide binding // inferred from electronic annotation /// 0003924 // GTPase activity // traceable author statement /// 0005515 // protein binding // inferred from physical interaction /// 0005525 // GTP binding // inferred from electronic annotation	17	17q	40291977
239328_at			0.034	0.955	3.2	3.5	-0.3	0.812252		---	---	---	---	---	---	1	1q	1.67612e+08
226339_at			0.034	0.955	7	7.3	-0.3	0.812252		TRUB1	TRUB1	TruB pseudouridine (psi) synthase homolog 1 (E. coli)	---	0001522 // pseudouridine synthesis // inferred from electronic annotation /// 0006396 // RNA processing // inferred from electronic annotation /// 0008033 // tRNA processing // inferred from electronic annotation /// 0009451 // RNA modification // inferred from electronic annotation	0003723 // RNA binding // inferred from electronic annotation /// 0009982 // pseudouridine synthase activity // inferred from electronic annotation /// 0016853 // isomerase activity // inferred from electronic annotation	10	10q	1.16736e+08
228172_at			0.034	0.955	4.6	4.9	-0.3	0.812252		---	---	---	---	---	---	9	9q	1.24578e+08
209397_at			0.034	0.955	8.9	9.2	-0.3	0.812252		ME2	ME2	malic enzyme 2. NAD(+)-dependent. mitochondrial	---	0006108 // malate metabolic process // inferred from electronic annotation /// 0008152 // metabolic process // inferred from electronic annotation /// 0055114 // oxidation reduction // inferred from electronic annotation	0003824 // catalytic activity // inferred from electronic annotation /// 0004470 // malic enzyme activity // inferred from electronic annotation /// 0004471 // malate dehydrogenase (decarboxylating) activity // traceable author statement /// 0005488 // binding // inferred from electronic annotation /// 0009055 // electron carrier activity // traceable author statement /// 0016491 // oxidoreductas…	18	18q	4.84399e+07
228275_at			0.035	0.955	6.9	7.2	-0.3	0.812252		---	---	---	---	---	---	3	3q	183169453
1561741_at			0.035	0.955	2.3	2.7	-0.3	0.812252		---	---	---	---	---	---	1	1q	200651005
212699_at			0.035	0.955	6.3	6.7	-0.3	0.812252		SCAMP5	SCAMP5	secretory carrier membrane protein 5	---	0006810 // transport // inferred from electronic annotation /// 0006887 // exocytosis // inferred from electronic annotation /// 0015031 // protein transport // inferred from electronic annotation /// 0034976 // response to endoplasmic reticulum stress // inferred from direct assay /// 0045806 // negative regulation of endocytosis // inferred from direct assay /// 0045956 // positive regulation o…	0005515 // protein binding // inferred from physical interaction	15	15q	7.53127e+07
202432_at			0.036	0.955	8.1	8.4	-0.3	0.812252		PPP3CB	PPP3CB	protein phosphatase 3. catalytic subunit. beta isozyme	---	0000082 // G1/S transition of mitotic cell cycle // inferred from electronic annotation /// 0001915 // negative regulation of T cell mediated cytotoxicity // inferred from electronic annotation /// 0001975 // response to amphetamine // inferred from electronic annotation /// 0006470 // protein dephosphorylation // inferred from electronic annotation /// 0006606 // protein import into nucleus // i…	0004721 // phosphoprotein phosphatase activity // inferred from electronic annotation /// 0004722 // protein serine/threonine phosphatase activity // inferred from electronic annotation /// 0004723 // calcium-dependent protein serine/threonine phosphatase activity // inferred from electronic annotation /// 0005515 // protein binding // inferred from electronic annotation /// 0005516 // calmodulin…	10	10q	7.52262e+07
220021_at			0.036	0.955	2.7	3	-0.3	0.812252		TMC7	TMC7	transmembrane channel-like 7	---	---	---	16	16p	1.90544e+07
212098_at			0.037	0.955	8	8.4	-0.3	0.812252		LOC151162	LOC151162 /// MGAT5	hypothetical LOC151162 /// mannosyl (alpha-1.6-)-glycoprotein beta-1.6-N-acetyl-glucosaminyltransferase	---	0006487 // protein N-linked glycosylation // non-traceable author statement /// 0006487 // protein N-linked glycosylation // inferred from electronic annotation	0008375 // acetylglucosaminyltransferase activity // inferred from electronic annotation /// 0016740 // transferase activity // inferred from electronic annotation /// 0016757 // transferase activity. transferring glycosyl groups // inferred from electronic annotation /// 0030144 // alpha-1.6-mannosyl-glycoprotein 6-beta-N-acetylglucosaminyltransferase activity // non-traceable author statement /…	2	2q	135210327
1569040_s_at			0.037	0.955	1.8	2.2	-0.3	0.812252		ANKRD36BP2	ANKRD36BP2	ankyrin repeat domain 36B pseudogene 2	---	---	---	2	2p	89085771
231047_at			0.039	0.955	3.2	3.5	-0.3	0.812252		---	---	---	---	---	---	10	10q	98590617
212895_s_at			0.039	0.955	8	8.3	-0.3	0.812252		ABR	ABR	active BCR-related gene	---	0006915 // apoptosis // not recorded /// 0007165 // signal transduction // inferred from electronic annotation /// 0007264 // small GTPase mediated signal transduction // traceable author statement /// 0008624 // induction of apoptosis by extracellular signals // not recorded /// 0035023 // regulation of Rho protein signal transduction // inferred from electronic annotation	0005085 // guanyl-nucleotide exchange factor activity // not recorded /// 0005085 // guanyl-nucleotide exchange factor activity // inferred from electronic annotation /// 0005089 // Rho guanyl-nucleotide exchange factor activity // inferred from electronic annotation /// 0005096 // GTPase activator activity // inferred from electronic annotation /// 0005096 // GTPase activator activity // traceab…	17	17p	907212
244111_at			0.039	0.955	1.8	2.2	-0.3	0.812252		KRT222	KRT222	keratin 222	---	---	0005198 // structural molecule activity // inferred from electronic annotation	17	17q	3.88126e+07
209525_at			0.04	0.955	5.4	5.7	-0.3	0.812252		HDGFRP3	HDGFRP3	Hepatoma-derived growth factor. related protein 3	---	0008283 // cell proliferation // non-traceable author statement	0008083 // growth factor activity // inferred from electronic annotation	15	15q	83840947
209028_s_at			0.04	0.955	7.4	7.8	-0.3	0.812252		ABI1	ABI1	abl-interactor 1	---	0001756 // somitogenesis // inferred from electronic annotation /// 0006928 // cellular component movement // inferred from direct assay /// 0007169 // transmembrane receptor protein tyrosine kinase signaling pathway // traceable author statement /// 0008154 // actin polymerization or depolymerization // non-traceable author statement /// 0008285 // negative regulation of cell proliferation // tr…	0005515 // protein binding // inferred from physical interaction /// 0005515 // protein binding // inferred from electronic annotation /// 0008092 // cytoskeletal protein binding // traceable author statement /// 0030296 // protein tyrosine kinase activator activity // inferred from electronic annotation	10	10p	2.70928e+07
1553589_a_at			0.04	0.955	2.7	3	-0.3	0.812252		PDZK1IP1	PDZK1IP1	PDZK1 interacting protein 1	---	---	---	1	1p	47652623
222990_at			0.04	0.955	9.1	9.3	-0.3	0.812252		UBQLN1	UBQLN1	ubiquilin 1	---	0001666 // response to hypoxia // inferred from mutant phenotype /// 0006915 // apoptosis // inferred from mutant phenotype /// 0031396 // regulation of protein ubiquitination // inferred from direct assay	0005488 // binding // inferred from electronic annotation /// 0005515 // protein binding // inferred from physical interaction /// 0005515 // protein binding // inferred from electronic annotation /// 0019900 // kinase binding // inferred from physical interaction	9	9q	86298907
241672_at			0.041	0.955	1.7	2.1	-0.3	0.812252		C13orf36	C13orf36	chromosome 13 open reading frame 36	---	---	---	13	13q	3.72718e+07
221874_at			0.041	0.955	2.7	3	-0.3	0.812252		KIAA1324	KIAA1324	KIAA1324	---	---	0005515 // protein binding // inferred from electronic annotation	1	1p	109740570
211379_x_at			0.042	0.955	6.7	7.1	-0.3	0.812252		B3GALNT1	B3GALNT1	beta-1.3-N-acetylgalactosaminyltransferase 1 (globoside blood group)	---	0006486 // protein glycosylation // inferred from electronic annotation /// 0006486 // protein glycosylation // traceable author statement /// 0009312 // oligosaccharide biosynthetic process // inferred from electronic annotation	0008378 // galactosyltransferase activity // inferred from electronic annotation /// 0008499 // UDP-galactose:beta-N-acetylglucosamine beta-1.3-galactosyltransferase activity // inferred from electronic annotation /// 0008499 // UDP-galactose:beta-N-acetylglucosamine beta-1.3-galactosyltransferase activity // traceable author statement /// 0016740 // transferase activity // inferred from electron…	3	3q	1.60804e+08
219884_at			0.042	0.955	3.9	4.2	-0.3	0.812252		LHX6	LHX6	LIM homeobox 6	---	0006350 // transcription // inferred from electronic annotation /// 0006355 // regulation of transcription. DNA-dependent // inferred from electronic annotation /// 0007275 // multicellular organismal development // inferred from electronic annotation /// 0007399 // nervous system development // inferred from electronic annotation /// 0021799 // cerebral cortex radially oriented cell migration //…	0003677 // DNA binding // inferred from electronic annotation /// 0003700 // sequence-specific DNA binding transcription factor activity // non-traceable author statement /// 0003700 // sequence-specific DNA binding transcription factor activity // inferred from electronic annotation /// 0005515 // protein binding // inferred from electronic annotation /// 0008270 // zinc ion binding // inferred …	9	9q	1.24978e+08
209935_at			0.043	0.955	6.7	6.9	-0.3	0.812252		ATP2C1	ATP2C1	ATPase. Ca++ transporting. type 2C. member 1	---	0006754 // ATP biosynthetic process // inferred from electronic annotation /// 0006810 // transport // inferred from electronic annotation /// 0006811 // ion transport // inferred from electronic annotation /// 0006812 // cation transport // inferred from electronic annotation /// 0006816 // calcium ion transport // inferred from direct assay /// 0006816 // calcium ion transport // inferred from …	0000166 // nucleotide binding // inferred from electronic annotation /// 0003824 // catalytic activity // inferred from electronic annotation /// 0004871 // signal transducer activity // inferred from mutant phenotype /// 0005388 // calcium-transporting ATPase activity // inferred from direct assay /// 0005388 // calcium-transporting ATPase activity // inferred from mutant phenotype /// 0005388 /…	3	3q	130674287
208056_s_at			0.043	0.955	3.2	3.5	-0.3	0.812252		CBFA2T3	CBFA2T3	core-binding factor. runt domain. alpha subunit 2; translocated to. 3	---	0006350 // transcription // inferred from electronic annotation /// 0006355 // regulation of transcription. DNA-dependent // inferred from electronic annotation /// 0008283 // cell proliferation // traceable author statement /// 0030154 // cell differentiation // inferred from electronic annotation /// 0030851 // granulocyte differentiation // inferred from direct assay /// 0045449 // regulation …	0003700 // sequence-specific DNA binding transcription factor activity // inferred from electronic annotation /// 0005515 // protein binding // inferred from physical interaction /// 0008270 // zinc ion binding // inferred from electronic annotation /// 0046872 // metal ion binding // inferred from electronic annotation	16	16q	8.89923e+07
32502_at			0.043	0.955	4.8	5.1	-0.3	0.812252		GDPD5	GDPD5	glycerophosphodiester phosphodiesterase domain containing 5	---	0006071 // glycerol metabolic process // inferred from electronic annotation /// 0006629 // lipid metabolic process // inferred from electronic annotation /// 0007399 // nervous system development // inferred from electronic annotation	0008081 // phosphoric diester hydrolase activity // inferred from electronic annotation /// 0008889 // glycerophosphodiester phosphodiesterase activity // inferred from electronic annotation /// 0016787 // hydrolase activity // inferred from electronic annotation	11	11q	7.51497e+07
211587_x_at			0.043	0.955	4.4	4.7	-0.3	0.812252		CHRNA3	CHRNA3	cholinergic receptor. nicotinic. alpha 3	---	0006810 // transport // inferred from electronic annotation /// 0006811 // ion transport // non-traceable author statement /// 0006811 // ion transport // inferred from electronic annotation /// 0006937 // regulation of muscle contraction // inferred from electronic annotation /// 0006940 // regulation of smooth muscle contraction // inferred from sequence or structural similarity /// 0006940 // …	0004872 // receptor activity // inferred from electronic annotation /// 0004889 // nicotinic acetylcholine-activated cation-selective channel activity // inferred from direct assay /// 0004889 // nicotinic acetylcholine-activated cation-selective channel activity // inferred from electronic annotation /// 0005216 // ion channel activity // inferred from electronic annotation /// 0005230 // extrac…	15	15q	78899299
221861_at			0.044	0.955	5.4	5.7	-0.3	0.812252		---	---	---	---	---	---	11	11q	74972339
221080_s_at			0.044	0.955	3.8	4.1	-0.3	0.812252		DENND1C	DENND1C	DENN/MADD domain containing 1C	---	---	---	19	19p	6474508
227733_at			0.044	0.955	3.7	4	-0.3	0.812252		TMEM63C	TMEM63C	transmembrane protein 63C	---	---	---	14	14q	77686906
230318_at			0.045	0.955	3	3.3	-0.3	0.812252		SERPINA1	SERPINA1	serpin peptidase inhibitor. clade A (alpha-1 antiproteinase. antitrypsin). member 1	---	0001666 // response to hypoxia // inferred from electronic annotation /// 0006953 // acute-phase response // inferred from electronic annotation /// 0007596 // blood coagulation // inferred from electronic annotation /// 0010035 // response to inorganic substance // inferred from electronic annotation /// 0010288 // response to lead ion // inferred from electronic annotation /// 0014070 // respon…	0002020 // protease binding // inferred from physical interaction /// 0004867 // serine-type endopeptidase inhibitor activity // inferred from direct assay /// 0004867 // serine-type endopeptidase inhibitor activity // non-traceable author statement /// 0004867 // serine-type endopeptidase inhibitor activity // inferred from electronic annotation /// 0005515 // protein binding // inferred from ph…	14	14q	94843316
229055_at			0.045	0.955	4	4.3	-0.3	0.812252		GPR68	GPR68	G protein-coupled receptor 68	GPCRDB_Class_A_Rhodopsin-like2 // GenMAPP	0006954 // inflammatory response // traceable author statement /// 0007165 // signal transduction // inferred from electronic annotation /// 0007186 // G-protein coupled receptor protein signaling pathway // traceable author statement /// 0007186 // G-protein coupled receptor protein signaling pathway // inferred from electronic annotation	0004871 // signal transducer activity // inferred from electronic annotation /// 0004872 // receptor activity // inferred from electronic annotation /// 0004930 // G-protein coupled receptor activity // inferred from electronic annotation /// 0004930 // G-protein coupled receptor activity // traceable author statement	14	14q	9.16991e+07
224962_at			0.045	0.955	6.1	6.4	-0.3	0.812252		C9orf69	C9orf69	chromosome 9 open reading frame 69	---	---	---	9	9q	1.39009e+08
1552803_a_at			0.045	0.955	2.4	2.7	-0.3	0.812252		STMN1	STMN1	stathmin 1	---	0007019 // microtubule depolymerization // inferred from direct assay /// 0007052 // mitotic spindle organization // inferred from direct assay /// 0007165 // signal transduction // non-traceable author statement /// 0007275 // multicellular organismal development // inferred from electronic annotation /// 0007399 // nervous system development // inferred from electronic annotation /// 0007409 //…	0004871 // signal transducer activity // traceable author statement /// 0005515 // protein binding // inferred from physical interaction /// 0015631 // tubulin binding // inferred from direct assay	1	1p	2.62149e+07
1554133_at			0.046	0.955	1.9	2.2	-0.3	0.812252		RUFY2	RUFY2	RUN and FYVE domain containing 2	---	---	0008270 // zinc ion binding // inferred from electronic annotation /// 0046872 // metal ion binding // inferred from electronic annotation	10	10q	70151986
1557465_at			0.046	0.955	2.2	2.5	-0.3	0.812252		NCRNA00282	NCRNA00282	non-protein coding RNA 282	---	---	---	13	13q	52388818
229385_s_at			0.046	0.955	2.7	3	-0.3	0.812252		PLAC2	PLAC2	placenta-specific 2 (non-protein coding)	---	---	---	19	19p	5558742
236377_at			0.047	0.955	2.7	2.9	-0.3	0.812252		TMEM132D	TMEM132D	transmembrane protein 132D	---	---	---	12	12q	1.29556e+08
205175_s_at			0.047	0.955	3.7	3.9	-0.3	0.812252		KHK	KHK	ketohexokinase (fructokinase)	---	0005975 // carbohydrate metabolic process // inferred from electronic annotation /// 0006000 // fructose metabolic process // inferred from electronic annotation /// 0009744 // response to sucrose stimulus // inferred from electronic annotation /// 0009749 // response to glucose stimulus // inferred from electronic annotation /// 0009750 // response to fructose stimulus // inferred from electroni…	0000166 // nucleotide binding // inferred from electronic annotation /// 0004454 // ketohexokinase activity // inferred from electronic annotation /// 0004454 // ketohexokinase activity // traceable author statement /// 0005515 // protein binding // inferred from physical interaction /// 0005524 // ATP binding // inferred from electronic annotation /// 0016301 // kinase activity // inferred from …	2	2p	27316860
230325_at			0.047	0.955	2.8	3.1	-0.3	0.812252		LOC100133985	LOC100133985	hypothetical LOC100133985	---	---	---	2	2p	70351781
90265_at			0.047	0.955	6.5	6.9	-0.3	0.812252		ADAP1	ADAP1	ArfGAP with dual PH domains 1	---	0007166 // cell surface receptor linked signaling pathway // traceable author statement /// 0032312 // regulation of ARF GTPase activity // inferred from electronic annotation /// 0043087 // regulation of GTPase activity // inferred from mutant phenotype	0005096 // GTPase activator activity // inferred from electronic annotation /// 0005515 // protein binding // inferred from physical interaction /// 0005547 // phosphatidylinositol-3.4.5-trisphosphate binding // inferred from electronic annotation /// 0008060 // ARF GTPase activator activity // inferred from direct assay /// 0008060 // ARF GTPase activator activity // inferred from electronic ann…	7	7p	937782
232164_s_at			0.048	0.955	2.5	2.7	-0.3	0.812252		EPPK1	EPPK1	epiplakin 1	---	---	0005198 // structural molecule activity // non-traceable author statement /// 0005515 // protein binding // inferred from physical interaction	8	8q	1.4494e+08
242973_at			0.048	0.955	3.9	4.2	-0.3	0.812252		CACNA1C	CACNA1C	calcium channel. voltage-dependent. L type. alpha 1C subunit	Calcium_regulation_in_cardiac_cells // GenMAPP	0006810 // transport // inferred from electronic annotation /// 0006811 // ion transport // inferred from electronic annotation /// 0006816 // calcium ion transport // inferred from electronic annotation /// 0007204 // elevation of cytosolic calcium ion concentration // inferred from direct assay /// 0055085 // transmembrane transport // inferred from electronic annotation /// 0060402 // calcium …	0005216 // ion channel activity // inferred from electronic annotation /// 0005244 // voltage-gated ion channel activity // inferred from electronic annotation /// 0005245 // voltage-gated calcium channel activity // inferred from direct assay /// 0005245 // voltage-gated calcium channel activity // inferred from electronic annotation /// 0005262 // calcium channel activity // inferred from elect…	12	12p	2806936
206046_at			0.048	0.955	5.8	6.2	-0.3	0.812252		ADAM23	ADAM23	ADAM metallopeptidase domain 23	---	0006508 // proteolysis // inferred from electronic annotation /// 0007155 // cell adhesion // inferred from electronic annotation /// 0007229 // integrin-mediated signaling pathway // inferred from electronic annotation /// 0007417 // central nervous system development // traceable author statement	0004222 // metalloendopeptidase activity // inferred from electronic annotation /// 0005178 // integrin binding // traceable author statement /// 0008233 // peptidase activity // inferred from electronic annotation /// 0008237 // metallopeptidase activity // traceable author statement /// 0008237 // metallopeptidase activity // inferred from electronic annotation /// 0008270 // zinc ion binding /…	2	2q	207395522
1553141_at			0.049	0.955	2.8	3.1	-0.3	0.812252		C13orf31	C13orf31	chromosome 13 open reading frame 31	---	---	---	13	13q	4.44602e+07
32137_at			0.049	0.955	5.1	5.4	-0.3	0.812252		JAG2	JAG2	jagged 2	---	0001501 // skeletal system development // inferred from electronic annotation /// 0001666 // response to hypoxia // inferred from electronic annotation /// 0001701 // in utero embryonic development // inferred from electronic annotation /// 0003016 // respiratory system process // inferred from electronic annotation /// 0007049 // cell cycle // non-traceable author statement /// 0007154 // cell c…	0005112 // Notch binding // inferred from physical interaction /// 0005509 // calcium ion binding // inferred from electronic annotation /// 0005515 // protein binding // inferred from physical interaction /// 0008083 // growth factor activity // inferred from direct assay	14	14q	105621618
1555691_a_at			0.049	0.955	2.7	3.1	-0.3	0.812252		KLRK1	KLRK1	killer cell lectin-like receptor subfamily K. member 1	---	0002223 // stimulatory C-type lectin receptor signaling pathway // inferred from electronic annotation /// 0007165 // signal transduction // traceable author statement /// 0030101 // natural killer cell activation // traceable author statement /// 0030101 // natural killer cell activation // inferred from electronic annotation /// 0031295 // T cell costimulation // traceable author statement /// …	0004872 // receptor activity // inferred from electronic annotation /// 0004872 // receptor activity // traceable author statement /// 0005488 // binding // inferred from electronic annotation /// 0005515 // protein binding // inferred from physical interaction /// 0005515 // protein binding // inferred from electronic annotation /// 0005529 // sugar binding // inferred from electronic annotation…	12	12p	10535128
1555009_a_at			0.049	0.955	3	3.3	-0.3	0.812252		SYNJ2	SYNJ2	synaptojanin 2	---	0007420 // brain development // inferred from electronic annotation /// 0016311 // dephosphorylation // inferred from electronic annotation /// 0046855 // inositol phosphate dephosphorylation // inferred from electronic annotation /// 0046856 // phosphoinositide dephosphorylation // inferred from electronic annotation /// 0048312 // intracellular distribution of mitochondria // inferred from elec…	0000166 // nucleotide binding // inferred from electronic annotation /// 0003676 // nucleic acid binding // inferred from electronic annotation /// 0003723 // RNA binding // inferred from electronic annotation /// 0004437 // inositol or phosphatidylinositol phosphatase activity // inferred from electronic annotation /// 0004439 // phosphatidylinositol-4.5-bisphosphate 5-phosphatase activity // in…	6	6q	158504327
1556639_at			0.049	0.955	3.7	4	-0.3	0.812252		LOC439914	LOC439914	hypothetical LOC439914	---	---	---	11	11q	64217836
233781_s_at			0	0.864	2.9	3.1	-0.2	0.870551		RIF1	RIF1	RAP1 interacting factor homolog (yeast)	---	0006974 // response to DNA damage stimulus // inferred from electronic annotation /// 0007049 // cell cycle // inferred from electronic annotation /// 0019827 // stem cell maintenance // inferred from electronic annotation	0005488 // binding // inferred from electronic annotation /// 0005515 // protein binding // inferred from electronic annotation	2	2q	1.52353e+08
1561650_s_at			0	0.955	1.9	2.1	-0.2	0.870551		LOC285692	LOC285692	hypothetical LOC285692	---	---	---	5	5p	9.65014e+06
1558300_at			0	0.955	1.9	2.1	-0.2	0.870551		EFCAB5	EFCAB5	EF-hand calcium binding domain 5	---	---	0005509 // calcium ion binding // inferred from electronic annotation	17	17q	2.84265e+07
220806_x_at			0	0.955	2.3	2.5	-0.2	0.870551		GNG13	GNG13	guanine nucleotide binding protein (G protein). gamma 13	Calcium_regulation_in_cardiac_cells // GenMAPP /// G_Protein_Signaling // GenMAPP /// Smooth_muscle_contraction // GenMAPP	0007165 // signal transduction // inferred from electronic annotation /// 0007186 // G-protein coupled receptor protein signaling pathway // inferred from electronic annotation /// 0007200 // activation of phospholipase C activity by G-protein coupled receptor protein signaling pathway coupled to IP3 second messenger // inferred from electronic annotation /// 0009755 // hormone-mediated signaling…	0003924 // GTPase activity // inferred from electronic annotation /// 0004871 // signal transducer activity // inferred from electronic annotation	16	16p	849370
203161_s_at			0	0.955	2.3	2.4	-0.2	0.870551		RNF8	RNF8	ring finger protein 8	---	0006281 // DNA repair // inferred from electronic annotation /// 0006302 // double-strand break repair // inferred from direct assay /// 0006974 // response to DNA damage stimulus // inferred from electronic annotation /// 0007049 // cell cycle // inferred from electronic annotation /// 0007067 // mitosis // inferred from electronic annotation /// 0010212 // response to ionizing radiation // infe…	0003682 // chromatin binding // inferred from direct assay /// 0004842 // ubiquitin-protein ligase activity // inferred from direct assay /// 0005515 // protein binding // inferred from physical interaction /// 0005515 // protein binding // inferred from electronic annotation /// 0008270 // zinc ion binding // inferred from electronic annotation /// 0016874 // ligase activity // inferred from ele…	6	6p	3.73422e+07
242373_at			0.001	0.955	3.7	3.9	-0.2	0.870551		---	---	---	---	---	---	17	17q	3.74038e+07
218862_at			0.001	0.955	6.2	6.4	-0.2	0.870551		ASB13	ASB13	ankyrin repeat and SOCS box-containing 13	---	---	0005515 // protein binding // inferred from physical interaction	10	10p	5.69469e+06
1569417_at			0.001	0.955	2.5	2.7	-0.2	0.870551		---	---	---	---	---	---	5	5q	169660117
211738_x_at			0.001	0.955	3.2	3.3	-0.2	0.870551		CELA3A	CELA3A	chymotrypsin-like elastase family. member 3A	GPCRDB_Class_A_Rhodopsin-like // GenMAPP /// GPCRDB_Other // GenMAPP /// Peptide_GPCRs // GenMAPP	0006508 // proteolysis // inferred from electronic annotation /// 0006508 // proteolysis // non-traceable author statement /// 0006508 // proteolysis // traceable author statement /// 0007586 // digestion // traceable author statement /// 0008203 // cholesterol metabolic process // traceable author statement	0003824 // catalytic activity // inferred from electronic annotation /// 0004252 // serine-type endopeptidase activity // inferred from electronic annotation /// 0004252 // serine-type endopeptidase activity // non-traceable author statement /// 0004252 // serine-type endopeptidase activity // traceable author statement /// 0008233 // peptidase activity // inferred from electronic annotation /// …	1	1p	2.23336e+07
239532_at			0.001	0.955	4.7	4.8	-0.2	0.870551		---	---	---	---	---	---	2	2p	4.4395e+07
1569809_at			0.002	0.955	1.8	2	-0.2	0.870551		---	---	---	---	---	---	1	1p	3.24291e+07
206719_at			0.002	0.955	2.7	3	-0.2	0.870551		SYNGR4	SYNGR4	synaptogyrin 4	---	---	---	19	19q	4.88743e+07
237431_at			0.002	0.955	3.3	3.6	-0.2	0.870551		LOC100506882	LOC100506882	hypothetical LOC100506882	---	---	---	17	17q	58499133
205840_x_at			0.002	0.955	3.9	4	-0.2	0.870551		GH1	GH1	growth hormone 1	---	0002092 // positive regulation of receptor internalization // inferred from direct assay /// 0006355 // regulation of transcription. DNA-dependent // non-traceable author statement /// 0007259 // JAK-STAT cascade // inferred from direct assay /// 0010535 // positive regulation of activation of JAK2 kinase activity // inferred from direct assay /// 0014068 // positive regulation of phosphoinositid…	0005131 // growth hormone receptor binding // inferred from direct assay /// 0005131 // growth hormone receptor binding // inferred from physical interaction /// 0005148 // prolactin receptor binding // inferred from physical interaction /// 0005179 // hormone activity // inferred from electronic annotation /// 0005515 // protein binding // inferred from physical interaction /// 0008083 // growth…	17	17q	61995380
1562695_at			0.002	0.955	3.2	3.4	-0.2	0.870551		FOXN4	FOXN4	forkhead box N4	---	0006350 // transcription // inferred from electronic annotation /// 0006355 // regulation of transcription. DNA-dependent // inferred from electronic annotation /// 0007389 // pattern specification process // inferred from sequence or structural similarity /// 0008016 // regulation of heart contraction // inferred from sequence or structural similarity /// 0009790 // embryo development // inferre…	0003677 // DNA binding // inferred from electronic annotation /// 0003690 // double-stranded DNA binding // inferred from sequence or structural similarity /// 0003700 // sequence-specific DNA binding transcription factor activity // inferred from sequence or structural similarity /// 0003700 // sequence-specific DNA binding transcription factor activity // inferred from electronic annotation ///…	12	12q	1.09723e+08
239870_at			0.002	0.955	3	3.1	-0.2	0.870551		SPATS1	SPATS1 /// TMEM151B	spermatogenesis associated. serine-rich 1 /// transmembrane protein 151B	---	---	---	6	6p	44332729
1559033_at			0.002	0.955	2.3	2.5	-0.2	0.870551		LOC255167	LOC255167	hypothetical LOC255167	---	---	---	5	5p	6.58582e+06
1569339_s_at			0.002	0.955	3.5	3.6	-0.2	0.870551		LOC100287558	LOC100287558	hypothetical LOC100287558	---	---	---	14	14q	7.37117e+07
1555189_a_at			0.002	0.955	2.2	2.4	-0.2	0.870551		TAT	TAT	tyrosine aminotransferase	---	0006103 // 2-oxoglutarate metabolic process // inferred from direct assay /// 0006519 // cellular amino acid and derivative metabolic process // inferred from electronic annotation /// 0006520 // cellular amino acid metabolic process // inferred from electronic annotation /// 0006536 // glutamate metabolic process // inferred from direct assay /// 0006559 // L-phenylalanine catabolic process // n…	0003824 // catalytic activity // inferred from electronic annotation /// 0004838 // L-tyrosine:2-oxoglutarate aminotransferase activity // inferred from direct assay /// 0004838 // L-tyrosine:2-oxoglutarate aminotransferase activity // non-traceable author statement /// 0004838 // L-tyrosine:2-oxoglutarate aminotransferase activity // inferred from electronic annotation /// 0008483 // transaminas…	16	16q	7.16102e+07
1554318_at			0.002	0.955	2.8	3	-0.2	0.870551		LOC541473	LOC541473	FK506 binding protein 6. 36kDa pseudogene	---	---	---	7	7q	7.24419e+07
216730_at			0.002	0.955	4.2	4.4	-0.2	0.870551		---	---	---	---	---	---	9	9p	1.69152e+07
233189_at			0.002	0.955	2.3	2.4	-0.2	0.870551		---	---	---	---	---	---	7	7q	88426435
216732_at			0.003	0.955	2.2	2.3	-0.2	0.870551		---	---	---	---	---	---	9	9q	9.07936e+07
238330_s_at			0.003	0.955	3.1	3.3	-0.2	0.870551		MPRIP	MPRIP	Myosin phosphatase Rho interacting protein	---	---	0003779 // actin binding // inferred from electronic annotation /// 0005515 // protein binding // inferred from physical interaction	17	17p	16996528
230564_at			0.003	0.955	2.7	2.8	-0.2	0.870551		SIPA1L3	SIPA1L3	Signal-induced proliferation-associated 1 like 3	---	0051056 // regulation of small GTPase mediated signal transduction // inferred from electronic annotation	0005096 // GTPase activator activity // inferred from electronic annotation /// 0005515 // protein binding // inferred from electronic annotation	19	19q	38576343
208274_at			0.003	0.955	3.1	3.3	-0.2	0.870551		OCLM	OCLM	oculomedin	---	0007601 // visual perception // traceable author statement	---	1	1q	186370145
1562055_at			0.003	0.955	2.7	2.9	-0.2	0.870551		---	---	---	---	---	---	19	19p	23656094
1560971_a_at			0.003	0.955	2.2	2.4	-0.2	0.870551		---	---	---	---	---	---	12	12q	92889516
243446_at			0.003	0.955	2.2	2.4	-0.2	0.870551		JUB	JUB	Jub. ajuba homolog (Xenopus laevis)	---	0007049 // cell cycle // inferred from electronic annotation /// 0007155 // cell adhesion // inferred from electronic annotation /// 0030032 // lamellipodium assembly // inferred from electronic annotation /// 0030334 // regulation of cell migration // inferred from electronic annotation /// 0035313 // wound healing. spreading of epidermal cells // inferred from electronic annotation /// 0043087 …	0005515 // protein binding // inferred from electronic annotation /// 0008270 // zinc ion binding // inferred from electronic annotation /// 0046872 // metal ion binding // inferred from electronic annotation	14	14q	2.3448e+07
1560812_at			0.003	0.955	2.6	2.8	-0.2	0.870551		---	---	---	---	---	---	16	16q	87252876
237024_at			0.003	0.955	3	3.2	-0.2	0.870551		C3orf45	C3orf45	chromosome 3 open reading frame 45	---	---	---	3	3p	5.03243e+07
205502_at			0.003	0.955	2.5	2.7	-0.2	0.870551		CYP17A1	CYP17A1	cytochrome P450. family 17. subfamily A. polypeptide 1	Glucocorticoid_Mineralocorticoid_Metabolism // GenMAPP /// Steroid_Biosynthesis // GenMAPP	0006694 // steroid biosynthetic process // inferred from electronic annotation /// 0006694 // steroid biosynthetic process // traceable author statement /// 0006704 // glucocorticoid biosynthetic process // inferred from electronic annotation /// 0007548 // sex differentiation // traceable author statement /// 0008202 // steroid metabolic process // not recorded /// 0009636 // response to toxin /…	0004497 // monooxygenase activity // inferred from electronic annotation /// 0004508 // steroid 17-alpha-monooxygenase activity // not recorded /// 0004508 // steroid 17-alpha-monooxygenase activity // inferred from electronic annotation /// 0004508 // steroid 17-alpha-monooxygenase activity // traceable author statement /// 0005506 // iron ion binding // inferred from electronic annotation /// 0…	10	10q	104593725
39763_at			0.004	0.955	4.3	4.5	-0.2	0.870551		HPX	HPX	hemopexin	---	0002639 // positive regulation of immunoglobulin production // inferred from electronic annotation /// 0002925 // positive regulation of humoral immune response mediated by circulating immunoglobulin // inferred from electronic annotation /// 0006810 // transport // inferred from electronic annotation /// 0006879 // cellular iron ion homeostasis // traceable author statement /// 0015886 // heme t…	0005488 // binding // traceable author statement /// 0015232 // heme transporter activity // traceable author statement /// 0046872 // metal ion binding // inferred from electronic annotation	11	11p	6457246
1569789_at			0.004	0.955	2.4	2.6	-0.2	0.870551		---	---	---	---	---	---	3	3p	8.23737e+07
1566837_at			0.004	0.955	2.7	2.9	-0.2	0.870551		---	---	---	---	---	---	5	5q	63971972
232062_at			0.004	0.955	3.3	3.5	-0.2	0.870551		ADCY1	ADCY1	adenylate cyclase 1 (brain)	Calcium_regulation_in_cardiac_cells // GenMAPP /// G_Protein_Signaling // GenMAPP /// Smooth_muscle_contraction // GenMAPP	0006171 // cAMP biosynthetic process // non-traceable author statement /// 0006171 // cAMP biosynthetic process // inferred from electronic annotation /// 0007189 // activation of adenylate cyclase activity by G-protein signaling pathway // not recorded /// 0007193 // inhibition of adenylate cyclase activity by G-protein signaling pathway // not recorded /// 0007409 // axonogenesis // inferred fr…	0000166 // nucleotide binding // inferred from electronic annotation /// 0004016 // adenylate cyclase activity // not recorded /// 0004016 // adenylate cyclase activity // inferred from electronic annotation /// 0005516 // calmodulin binding // non-traceable author statement /// 0005516 // calmodulin binding // inferred from electronic annotation /// 0005524 // ATP binding // inferred from electr…	7	7p	4.57561e+07
1555237_at			0.004	0.955	3.1	3.2	-0.2	0.870551		---	---	---	---	---	---	16	16p	9.07986e+06
234667_at			0.004	0.955	2.9	3.1	-0.2	0.870551		---	---	---	---	---	---	3	3p	62954353
215430_at			0.004	0.955	2.2	2.3	-0.2	0.870551		GK2	GK2	glycerol kinase 2	Fatty_Acid_Degradation // GenMAPP	0005975 // carbohydrate metabolic process // inferred from electronic annotation /// 0006071 // glycerol metabolic process // non-traceable author statement /// 0006071 // glycerol metabolic process // inferred from electronic annotation /// 0006072 // glycerol-3-phosphate metabolic process // inferred from electronic annotation	0000166 // nucleotide binding // inferred from electronic annotation /// 0004370 // glycerol kinase activity // non-traceable author statement /// 0004370 // glycerol kinase activity // inferred from electronic annotation /// 0005524 // ATP binding // inferred from electronic annotation /// 0016301 // kinase activity // inferred from electronic annotation /// 0016740 // transferase activity // in…	4	4q	80328439
1555465_at			0.004	0.955	2.6	2.8	-0.2	0.870551		MCOLN2	MCOLN2	mucolipin 2	---	0006810 // transport // inferred from electronic annotation /// 0006811 // ion transport // inferred from electronic annotation	0005216 // ion channel activity // inferred from electronic annotation	1	1p	8.54119e+07
1552414_at			0.005	0.955	2	2.1	-0.2	0.870551		WFDC9	WFDC9	WAP four-disulfide core domain 9	---	---	---	20	20q	4.42482e+07
1553354_a_at			0.005	0.955	3.2	3.4	-0.2	0.870551		FLJ31958	FLJ31958	hypothetical LOC143153	---	---	---	10	10q	5.24187e+07
214969_at			0.005	0.955	3.1	3.3	-0.2	0.870551		MAP3K9	MAP3K9	mitogen-activated protein kinase kinase kinase 9	---	0006468 // protein phosphorylation // inferred from direct assay /// 0006468 // protein phosphorylation // non-traceable author statement /// 0006468 // protein phosphorylation // inferred from electronic annotation /// 0007257 // activation of JUN kinase activity // inferred from sequence or structural similarity /// 0008219 // cell death // inferred from electronic annotation /// 0043065 // pos…	0000166 // nucleotide binding // inferred from electronic annotation /// 0004672 // protein kinase activity // inferred from electronic annotation /// 0004674 // protein serine/threonine kinase activity // inferred from direct assay /// 0004674 // protein serine/threonine kinase activity // inferred from electronic annotation /// 0004706 // JUN kinase kinase kinase activity // inferred from seque…	14	14q	71236050
1556084_at			0.005	0.955	2	2.2	-0.2	0.870551		HNRNPM	HNRNPM	heterogeneous nuclear ribonucleoprotein M	---	0000380 // alternative nuclear mRNA splicing. via spliceosome // inferred from mutant phenotype /// 0000398 // nuclear mRNA splicing. via spliceosome // inferred by curator /// 0008380 // RNA splicing // not recorded	0000166 // nucleotide binding // inferred from electronic annotation /// 0003723 // RNA binding // non-traceable author statement /// 0005515 // protein binding // inferred from physical interaction /// 0019904 // protein domain specific binding // inferred from physical interaction	19	19p	8510050
210229_s_at			0.005	0.955	3.1	3.3	-0.2	0.870551		CSF2	CSF2	colony stimulating factor 2 (granulocyte-macrophage)	---	0006955 // immune response // inferred from electronic annotation /// 0008284 // positive regulation of cell proliferation // inferred from electronic annotation /// 0010468 // regulation of gene expression // inferred from electronic annotation /// 0010628 // positive regulation of gene expression // inferred from direct assay /// 0010744 // positive regulation of macrophage derived foam cell di…	0005125 // cytokine activity // inferred from electronic annotation /// 0005129 // granulocyte macrophage colony-stimulating factor receptor binding // inferred from electronic annotation /// 0005129 // granulocyte macrophage colony-stimulating factor receptor binding // traceable author statement /// 0005515 // protein binding // inferred from physical interaction /// 0008083 // growth factor ac…	5	5q	1.31411e+08
239641_at			0.005	0.955	4	4.2	-0.2	0.870551		---	---	---	---	---	---	11	11q	1.28562e+08
234515_at			0.005	0.955	2.4	2.6	-0.2	0.870551		PCGEM1	PCGEM1	prostate-specific transcript 1 (non-protein coding)	---	---	---	2	2q	1.93628e+08
1552555_at			0.005	0.955	4.1	4.3	-0.2	0.870551		PRSS36	PRSS36	protease. serine. 36	---	0006508 // proteolysis // inferred from electronic annotation	0003824 // catalytic activity // inferred from electronic annotation /// 0004252 // serine-type endopeptidase activity // inferred from direct assay /// 0004252 // serine-type endopeptidase activity // inferred from electronic annotation /// 0008233 // peptidase activity // inferred from electronic annotation /// 0008236 // serine-type peptidase activity // inferred from electronic annotation ///…	16	16p	3.11558e+07
1569415_at			0.005	0.955	4.6	4.8	-0.2	0.870551		---	---	---	---	---	---	2	2p	3.25824e+07
231649_at			0.005	0.955	3.1	3.2	-0.2	0.870551		---	---	---	---	---	---	11	11p	6.65695e+06
1569949_at			0.005	0.955	5.4	5.6	-0.2	0.870551		GRK5	GRK5	G protein-coupled receptor kinase 5	Calcium_regulation_in_cardiac_cells // GenMAPP /// Smooth_muscle_contraction // GenMAPP	0006468 // protein phosphorylation // inferred from electronic annotation /// 0007165 // signal transduction // inferred from electronic annotation /// 0007188 // G-protein signaling. coupled to cAMP nucleotide second messenger // traceable author statement /// 0007217 // tachykinin receptor signaling pathway // inferred from direct assay /// 0008277 // regulation of G-protein coupled receptor pr…	0000166 // nucleotide binding // inferred from electronic annotation /// 0004672 // protein kinase activity // inferred from electronic annotation /// 0004674 // protein serine/threonine kinase activity // inferred from electronic annotation /// 0004703 // G-protein coupled receptor kinase activity // inferred from electronic annotation /// 0004871 // signal transducer activity // inferred from e…	10	10q	1.21317e+08
221242_at			0.005	0.955	4.3	4.5	-0.2	0.870551		---	---	---	---	---	---	17	17p	1.74487e+07
1570197_at			0.005	0.955	4.4	4.5	-0.2	0.870551		---	---	---	---	---	---	19	19p	17504787
1559537_at			0.006	0.955	2.5	2.7	-0.2	0.870551		LOC100129309	LOC100129309	Similar to DnaJ (Hsp40) homolog. subfamily B. member 7	---	---	---	5	5q	1.79347e+08
1552903_at			0.006	0.955	2.4	2.5	-0.2	0.870551		B4GALNT2	B4GALNT2	beta-1.4-N-acetyl-galactosaminyl transferase 2	---	0006047 // UDP-N-acetylglucosamine metabolic process // inferred from electronic annotation /// 0006486 // protein glycosylation // inferred from electronic annotation /// 0019276 // UDP-N-acetylgalactosamine metabolic process // inferred from direct assay /// 0022408 // negative regulation of cell-cell adhesion // inferred from direct assay /// 0030259 // lipid glycosylation // inferred from ele…	0008376 // acetylgalactosaminyltransferase activity // inferred from direct assay /// 0016740 // transferase activity // inferred from electronic annotation /// 0016757 // transferase activity. transferring glycosyl groups // inferred from electronic annotation /// 0016758 // transferase activity. transferring hexosyl groups // inferred from electronic annotation	17	17q	47228782
1552629_a_at			0.006	0.955	2.2	2.4	-0.2	0.870551		JMJD6	JMJD6	jumonji domain containing 6	---	0001568 // blood vessel development // inferred from electronic annotation /// 0001822 // kidney development // inferred from electronic annotation /// 0006350 // transcription // inferred from electronic annotation /// 0006397 // mRNA processing // inferred from electronic annotation /// 0006915 // apoptosis // inferred from electronic annotation /// 0007166 // cell surface receptor linked signa…	0004872 // receptor activity // inferred from electronic annotation /// 0005515 // protein binding // inferred from physical interaction /// 0016491 // oxidoreductase activity // inferred from electronic annotation /// 0016702 // oxidoreductase activity. acting on single donors with incorporation of molecular oxygen. incorporation of two atoms of oxygen // inferred from electronic annotation /// …	17	17q	74717483
1570140_at			0.006	0.955	2.7	2.9	-0.2	0.870551		LOC653110	LOC653110	hypothetical LOC653110	---	---	---	10	10q	4.70929e+07
223567_at			0.006	0.955	2.4	2.7	-0.2	0.870551		SEMA6B	SEMA6B	sema domain. transmembrane domain (TM). and cytoplasmic domain. (semaphorin) 6B	---	0007275 // multicellular organismal development // inferred from electronic annotation /// 0007399 // nervous system development // inferred from electronic annotation /// 0030154 // cell differentiation // inferred from electronic annotation	0004872 // receptor activity // inferred from electronic annotation	19	19p	4550648
239855_at			0.007	0.955	3.1	3.3	-0.2	0.870551		PPM1L	PPM1L	Protein phosphatase. Mg2+/Mn2+ dependent. 1L	---	0000165 // MAPKKK cascade // inferred from electronic annotation /// 0006470 // protein dephosphorylation // inferred from electronic annotation /// 0007178 // transmembrane receptor protein serine/threonine kinase signaling pathway // inferred from electronic annotation	0003824 // catalytic activity // inferred from electronic annotation /// 0004721 // phosphoprotein phosphatase activity // inferred from electronic annotation /// 0004722 // protein serine/threonine phosphatase activity // not recorded /// 0004722 // protein serine/threonine phosphatase activity // inferred from electronic annotation /// 0005515 // protein binding // inferred from electronic anno…	3	3q	160787383
231681_x_at			0.007	0.955	2.5	2.7	-0.2	0.870551		HIST3H2A	HIST3H2A	Histone cluster 3. H2a	---	0006334 // nucleosome assembly // inferred from electronic annotation	0003677 // DNA binding // inferred from electronic annotation	1	1q	228645320
234903_at			0.007	0.955	2.2	2.4	-0.2	0.870551		OR2B3	OR2B3	olfactory receptor. family 2. subfamily B. member 3	---	0007165 // signal transduction // inferred from electronic annotation /// 0007186 // G-protein coupled receptor protein signaling pathway // inferred from electronic annotation /// 0007608 // sensory perception of smell // inferred from electronic annotation /// 0050896 // response to stimulus // inferred from electronic annotation	0004871 // signal transducer activity // inferred from electronic annotation /// 0004872 // receptor activity // inferred from electronic annotation /// 0004930 // G-protein coupled receptor activity // inferred from electronic annotation /// 0004984 // olfactory receptor activity // inferred from electronic annotation	6	6p	29054554
203206_at			0.007	0.955	5.1	5.4	-0.2	0.870551		FAM53B	FAM53B	family with sequence similarity 53. member B	---	---	---	10	10q	126351659
1557651_x_at			0.007	0.955	4.3	4.5	-0.2	0.870551		GALE	GALE	UDP-galactose-4-epimerase	---	0005975 // carbohydrate metabolic process // inferred from electronic annotation /// 0006012 // galactose metabolic process // inferred from electronic annotation /// 0008152 // metabolic process // inferred from electronic annotation /// 0019388 // galactose catabolic process // inferred from direct assay /// 0044237 // cellular metabolic process // inferred from electronic annotation	0003824 // catalytic activity // inferred from electronic annotation /// 0003978 // UDP-glucose 4-epimerase activity // inferred from direct assay /// 0003978 // UDP-glucose 4-epimerase activity // inferred from electronic annotation /// 0005488 // binding // inferred from electronic annotation /// 0016853 // isomerase activity // inferred from electronic annotation /// 0016857 // racemase and ep…	1	1p	24126029
208387_s_at			0.008	0.955	2.7	2.8	-0.2	0.870551		MMP24	MMP24	matrix metallopeptidase 24 (membrane-inserted)	Matrix_Metalloproteinases // GenMAPP	0006508 // proteolysis // inferred from electronic annotation /// 0006508 // proteolysis // traceable author statement /// 0008152 // metabolic process // inferred from electronic annotation	0004222 // metalloendopeptidase activity // inferred from electronic annotation /// 0004222 // metalloendopeptidase activity // traceable author statement /// 0005509 // calcium ion binding // inferred from electronic annotation /// 0008047 // enzyme activator activity // traceable author statement /// 0008233 // peptidase activity // inferred from electronic annotation /// 0008237 // metallopept…	20	20q	3.38388e+07
1561127_at			0.008	0.955	3.6	3.7	-0.2	0.870551		NCRNA00168	NCRNA00168	non-protein coding RNA 168	---	---	---	10	10p	1584001
1556855_a_at			0.008	0.955	3.2	3.4	-0.2	0.870551		LOC283501	LOC283501	hypothetical protein LOC283501	---	---	---	13	13q	113408029
1559687_at			0.008	0.955	3.4	3.5	-0.2	0.870551		TMEM221	TMEM221	transmembrane protein 221	---	---	---	19	19p	17557577
216323_x_at			0.008	0.955	6.7	6.9	-0.2	0.870551		TUBA3D	TUBA3D	tubulin. alpha 3d	---	0007017 // microtubule-based process // non-traceable author statement /// 0007017 // microtubule-based process // inferred from electronic annotation /// 0007018 // microtubule-based movement // inferred from electronic annotation /// 0051258 // protein polymerization // inferred from electronic annotation	0000166 // nucleotide binding // inferred from electronic annotation /// 0003924 // GTPase activity // inferred from electronic annotation /// 0005198 // structural molecule activity // inferred from electronic annotation /// 0005515 // protein binding // inferred from physical interaction /// 0005525 // GTP binding // non-traceable author statement /// 0005525 // GTP binding // inferred from ele…	2	2q	1.3224e+08
220689_at			0.008	0.955	2.9	3.1	-0.2	0.870551		---	---	---	---	---	---	10	10q	72195449
1562011_at			0.008	0.955	1.9	2.1	-0.2	0.870551		---	---	---	---	---	---	7	7q	111455205
1559204_x_at			0.008	0.955	4.5	4.7	-0.2	0.870551		KRAS	KRAS	v-Ki-ras2 Kirsten rat sarcoma viral oncogene homolog	G_Protein_Signaling // GenMAPP /// MAPK_Cascade // GenMAPP	0006915 // apoptosis // inferred from electronic annotation /// 0007165 // signal transduction // inferred from electronic annotation /// 0007264 // small GTPase mediated signal transduction // not recorded /// 0007264 // small GTPase mediated signal transduction // inferred from electronic annotation /// 0007265 // Ras protein signal transduction // not recorded /// 0007265 // Ras protein signal…	0000166 // nucleotide binding // inferred from electronic annotation /// 0003924 // GTPase activity // inferred from electronic annotation /// 0005515 // protein binding // inferred from physical interaction /// 0005515 // protein binding // inferred from electronic annotation /// 0005525 // GTP binding // inferred from electronic annotation /// 0019002 // GMP binding // inferred from electronic …	12	12p	2.53953e+07
221709_s_at			0.008	0.955	4.8	5	-0.2	0.870551		ZNF839	ZNF839	zinc finger protein 839	---	---	0008270 // zinc ion binding // inferred from electronic annotation /// 0046872 // metal ion binding // inferred from electronic annotation	14	14q	1.02803e+08
1561847_at			0.008	0.955	3.6	3.8	-0.2	0.870551		NUDT17	NUDT17	nudix (nucleoside diphosphate linked moiety X)-type motif 17	---	---	0016787 // hydrolase activity // inferred from electronic annotation /// 0046872 // metal ion binding // inferred from electronic annotation	1	1q	1.45588e+08
231378_at			0.008	0.955	4.5	4.7	-0.2	0.870551		---	---	---	---	---	---	8	8p	4.21283e+07
1566427_at			0.009	0.955	2.1	2.3	-0.2	0.870551		---	---	---	---	---	---	9	9p	36731600
211151_x_at			0.009	0.955	2.2	2.4	-0.2	0.870551		GH1	GH1	growth hormone 1	---	0002092 // positive regulation of receptor internalization // inferred from direct assay /// 0006355 // regulation of transcription. DNA-dependent // non-traceable author statement /// 0007259 // JAK-STAT cascade // inferred from direct assay /// 0010535 // positive regulation of activation of JAK2 kinase activity // inferred from direct assay /// 0014068 // positive regulation of phosphoinositid…	0005131 // growth hormone receptor binding // inferred from direct assay /// 0005131 // growth hormone receptor binding // inferred from physical interaction /// 0005148 // prolactin receptor binding // inferred from physical interaction /// 0005179 // hormone activity // inferred from electronic annotation /// 0005515 // protein binding // inferred from physical interaction /// 0008083 // growth…	17	17q	61995366
223793_at			0.009	0.955	3.8	4	-0.2	0.870551		BAT2L1	BAT2L1	HLA-B associated transcript 2-like 1	---	---	0005515 // protein binding // inferred from physical interaction	9	9q	1.34314e+08
237603_at			0.009	0.955	2.1	2.2	-0.2	0.870551		C1orf100	C1orf100	chromosome 1 open reading frame 100	---	---	---	1	1q	244534188
1565582_at			0.009	0.955	2.6	2.8	-0.2	0.870551		---	---	---	---	---	---	2	2q	2.3993e+08
1560198_at			0.009	0.955	4.8	5	-0.2	0.870551		C14orf70	C14orf70	chromosome 14 open reading frame 70	---	---	---	14	14q	101131350
234144_at			0.01	0.955	2.6	2.7	-0.2	0.870551		---	---	---	---	---	---	4	4q	1.45609e+08
221378_at			0.01	0.955	2.7	2.9	-0.2	0.870551		CER1	CER1	cerberus 1. cysteine knot superfamily. homolog (Xenopus laevis)	---	0007369 // gastrulation // inferred from electronic annotation /// 0008285 // negative regulation of cell proliferation // inferred from electronic annotation /// 0009948 // anterior/posterior axis specification // inferred from electronic annotation /// 0009952 // anterior/posterior pattern formation // inferred from electronic annotation /// 0030509 // BMP signaling pathway // not recorded /// …	0005125 // cytokine activity // inferred from electronic annotation	9	9p	1.47214e+07
207310_s_at			0.01	0.955	4.4	4.6	-0.2	0.870551		NOS1	NOS1	nitric oxide synthase 1 (neuronal)	Smooth_muscle_contraction // GenMAPP	0001666 // response to hypoxia // inferred from expression pattern /// 0002028 // regulation of sodium ion transport // inferred from electronic annotation /// 0006527 // arginine catabolic process // inferred by curator /// 0006809 // nitric oxide biosynthetic process // inferred from sequence or structural similarity /// 0006809 // nitric oxide biosynthetic process // inferred from electronic a…	0004517 // nitric-oxide synthase activity // not recorded /// 0004517 // nitric-oxide synthase activity // inferred from sequence or structural similarity /// 0004517 // nitric-oxide synthase activity // inferred from electronic annotation /// 0005506 // iron ion binding // inferred from electronic annotation /// 0005515 // protein binding // inferred from physical interaction /// 0005515 // prot…	12	12q	1.17711e+08
226411_at			0.01	0.955	4.8	5.1	-0.2	0.870551		EVI5L	EVI5L	ecotropic viral integration site 5-like	---	0032313 // regulation of Rab GTPase activity // inferred from electronic annotation	0005096 // GTPase activator activity // inferred from electronic annotation /// 0005097 // Rab GTPase activator activity // inferred from electronic annotation /// 0005515 // protein binding // inferred from physical interaction	19	19p	7929281
1555052_a_at			0.01	0.955	1.9	2.2	-0.2	0.870551		SYT9	SYT9	synaptotagmin IX	---	0006810 // transport // inferred from electronic annotation /// 0017158 // regulation of calcium ion-dependent exocytosis // inferred from electronic annotation /// 0050796 // regulation of insulin secretion // inferred from electronic annotation	0005215 // transporter activity // inferred from electronic annotation /// 0005515 // protein binding // inferred from electronic annotation /// 0046872 // metal ion binding // inferred from electronic annotation	11	11p	7.39502e+06
210060_at			0.01	0.955	4.9	5.1	-0.2	0.870551		PDE6G	PDE6G	phosphodiesterase 6G. cGMP-specific. rod. gamma	---	0000187 // activation of MAPK activity // inferred from electronic annotation /// 0007601 // visual perception // inferred from electronic annotation /// 0007601 // visual perception // traceable author statement /// 0045742 // positive regulation of epidermal growth factor receptor signaling pathway // inferred from electronic annotation /// 0045745 // positive regulation of G-protein coupled re…	0004114 // 3'.5'-cyclic-nucleotide phosphodiesterase activity // inferred from electronic annotation /// 0004857 // enzyme inhibitor activity // traceable author statement /// 0005515 // protein binding // inferred from electronic annotation /// 0016787 // hydrolase activity // inferred from electronic annotation /// 0030553 // cGMP binding // inferred from electronic annotation	17	17q	7.96205e+07
1556042_s_at			0.01	0.955	5.5	5.7	-0.2	0.870551		LOC338799	LOC338799	hypothetical LOC338799	---	---	---	12	12q	122237281
237256_at			0.01	0.955	2.7	2.9	-0.2	0.870551		FBXL12	FBXL12	F-box and leucine-rich repeat protein 12	---	0006511 // ubiquitin-dependent protein catabolic process // inferred from electronic annotation	---	19	19p	9.92908e+06
1553594_a_at			0.01	0.955	3.4	3.6	-0.2	0.870551		INSL3	INSL3	insulin-like 3 (Leydig cell)	---	0001556 // oocyte maturation // inferred from electronic annotation /// 0001701 // in utero embryonic development // inferred from electronic annotation /// 0007193 // inhibition of adenylate cyclase activity by G-protein signaling pathway // inferred from electronic annotation /// 0007267 // cell-cell signaling // traceable author statement /// 0007283 // spermatogenesis // traceable author stat…	0001664 // G-protein-coupled receptor binding // inferred from electronic annotation /// 0004871 // signal transducer activity // traceable author statement /// 0005102 // receptor binding // traceable author statement /// 0005158 // insulin receptor binding // traceable author statement /// 0005179 // hormone activity // inferred from electronic annotation	19	19p	1.793e+07
1569305_a_at			0.01	0.955	2.8	3.1	-0.2	0.870551		---	---	---	---	---	---	19	19q	31399085
234355_s_at			0.011	0.955	4.2	4.5	-0.2	0.870551		PTCHD2	PTCHD2	patched domain containing 2	---	---	0008158 // hedgehog receptor activity // inferred from electronic annotation	1	1p	1.15745e+07
222746_s_at			0.011	0.955	2.4	2.7	-0.2	0.870551		BSPRY	BSPRY	B-box and SPRY domain containing	---	0006810 // transport // inferred from electronic annotation /// 0006811 // ion transport // inferred from electronic annotation /// 0006816 // calcium ion transport // inferred from electronic annotation	0005515 // protein binding // inferred from electronic annotation /// 0008270 // zinc ion binding // inferred from electronic annotation /// 0046872 // metal ion binding // inferred from electronic annotation	9	9q	116122664
215748_at			0.011	0.955	3	3.2	-0.2	0.870551		KLHL35	KLHL35	kelch-like 35 (Drosophila)	---	---	---	11	11q	75134694
240518_at			0.011	0.955	2.7	2.9	-0.2	0.870551		LOC729291	LOC729291	Hypothetical protein LOC729291	---	---	---	12	12p	2.83409e+07
213669_at			0.011	0.955	4.3	4.6	-0.2	0.870551		FCHO1	FCHO1	FCH domain only 1	---	---	---	19	19p	17882397
241899_at			0.011	0.955	3.8	4	-0.2	0.870551		LOC553103	LOC553103	hypothetical LOC553103	---	---	---	5	5q	1.31647e+08
216579_at			0.011	0.955	3.5	3.7	-0.2	0.870551		GJB4	GJB4	gap junction protein. beta 4. 30.3kDa	Calcium_regulation_in_cardiac_cells // GenMAPP	0007154 // cell communication // non-traceable author statement /// 0007154 // cell communication // inferred from electronic annotation	0005243 // gap junction channel activity // non-traceable author statement	1	1p	35227541
217423_at			0.011	0.955	2.1	2.2	-0.2	0.870551		---	---	---	---	---	---	6	6q	1.67764e+08
1555855_at			0.012	0.955	2.6	2.8	-0.2	0.870551		---	---	---	---	---	---	10	10p	5.02284e+06
211154_at			0.012	0.955	2.1	2.3	-0.2	0.870551		THPO	THPO	thrombopoietin	---	0007275 // multicellular organismal development // traceable author statement /// 0008283 // cell proliferation // traceable author statement /// 0008283 // cell proliferation // inferred from electronic annotation /// 0008284 // positive regulation of cell proliferation // inferred from electronic annotation /// 0030099 // myeloid cell differentiation // inferred from electronic annotation /// 0…	0005102 // receptor binding // inferred from electronic annotation /// 0005125 // cytokine activity // inferred from electronic annotation /// 0005179 // hormone activity // inferred from electronic annotation /// 0008083 // growth factor activity // traceable author statement	3	3q	184091921
210399_x_at			0.012	0.955	4.9	5.1	-0.2	0.870551		FUT6	FUT6	fucosyltransferase 6 (alpha (1.3) fucosyltransferase)	---	0006486 // protein glycosylation // traceable author statement /// 0006486 // protein glycosylation // inferred from electronic annotation /// 0042355 // L-fucose catabolic process // non-traceable author statement	0008417 // fucosyltransferase activity // traceable author statement /// 0008417 // fucosyltransferase activity // inferred from electronic annotation /// 0016740 // transferase activity // inferred from electronic annotation /// 0016757 // transferase activity. transferring glycosyl groups // inferred from electronic annotation /// 0017060 // 3-galactosyl-N-acetylglucosaminide 4-alpha-L-fucosylt…	19	19p	5834905
1560579_s_at			0.012	0.955	3.5	3.8	-0.2	0.870551		---	---	---	---	---	---	1	1p	1.13501e+08
1553196_a_at			0.012	0.955	1.9	2.1	-0.2	0.870551		FCRL3	FCRL3	Fc receptor-like 3	---	---	0004872 // receptor activity // inferred from electronic annotation	1	1q	1.57659e+08
237827_at			0.012	0.955	2.5	2.6	-0.2	0.870551		---	---	---	---	---	---	9	9p	34889291
1568849_at			0.012	0.955	2.6	2.8	-0.2	0.870551		NCRNA00165	NCRNA00165	non-protein coding RNA 165	---	---	---	21	21q	4.64149e+07
214903_at			0.012	0.955	4.3	4.5	-0.2	0.870551		SYT2	SYT2	synaptotagmin II	---	0006810 // transport // inferred from electronic annotation	0005215 // transporter activity // inferred from electronic annotation /// 0005509 // calcium ion binding // inferred from electronic annotation /// 0005515 // protein binding // inferred from physical interaction /// 0005515 // protein binding // inferred from electronic annotation /// 0005544 // calcium-dependent phospholipid binding // inferred from electronic annotation /// 0046872 // metal i…	1	1q	202560656
234770_at			0.012	0.955	2.9	3.1	-0.2	0.870551		---	---	---	---	---	---	11	11p	5192106
1566903_at			0.012	0.955	4	4.1	-0.2	0.870551		---	---	---	---	---	---	1	1p	53769067
206485_at			0.012	0.955	4.2	4.4	-0.2	0.870551		CD5	CD5	CD5 molecule	---	0008037 // cell recognition // non-traceable author statement /// 0008283 // cell proliferation // non-traceable author statement /// 0008624 // induction of apoptosis by extracellular signals // inferred from electronic annotation /// 0031295 // T cell costimulation // inferred from electronic annotation /// 0050670 // regulation of lymphocyte proliferation // inferred from electronic annotation	0001948 // glycoprotein binding // inferred from electronic annotation /// 0004872 // receptor activity // non-traceable author statement /// 0004888 // transmembrane receptor activity // non-traceable author statement /// 0005044 // scavenger receptor activity // inferred from electronic annotation /// 0005515 // protein binding // inferred from physical interaction /// 0005515 // protein bindin…	11	11q	60882239
231456_at			0.013	0.955	2	2.1	-0.2	0.870551		---	---	---	---	---	---	12	12p	7340897
1555371_at			0.013	0.955	3.1	3.3	-0.2	0.870551		ABCB5	ABCB5	ATP-binding cassette. sub-family B (MDR/TAP). member 5	---	0006810 // transport // inferred from electronic annotation /// 0042391 // regulation of membrane potential // inferred from direct assay /// 0055085 // transmembrane transport // inferred from direct assay /// 0055085 // transmembrane transport // inferred from sequence or structural similarity /// 0055085 // transmembrane transport // inferred from electronic annotation	0000166 // nucleotide binding // inferred from electronic annotation /// 0005524 // ATP binding // inferred from electronic annotation /// 0015562 // efflux transmembrane transporter activity // inferred from direct assay /// 0016887 // ATPase activity // inferred from electronic annotation /// 0017111 // nucleoside-triphosphatase activity // inferred from electronic annotation /// 0042626 // ATP…	7	7p	20758195
236593_at			0.013	0.955	3.9	4	-0.2	0.870551		LOC100131303	LOC100131303	Similar to hCG1775037	---	---	---	16	16q	6.80476e+07
1559586_at			0.013	0.955	2.2	2.4	-0.2	0.870551		LOC728868	LOC728868	hypothetical protein LOC728868	---	---	---	8	8p	1.02827e+07
1555209_at			0.013	0.955	2.4	2.6	-0.2	0.870551		LOC439951	LOC439951	hypothetical LOC439951	---	---	---	10	10p	1.16538e+07
1562324_a_at			0.013	0.955	2.8	3	-0.2	0.870551		---	---	---	---	---	---	16	16q	85177952
214216_s_at			0.014	0.955	2.2	2.4	-0.2	0.870551		LARP4B	LARP4B	La ribonucleoprotein domain family. member 4B	---	---	0000166 // nucleotide binding // inferred from electronic annotation /// 0003676 // nucleic acid binding // inferred from electronic annotation /// 0003723 // RNA binding // inferred from electronic annotation	10	10p	910288
221296_at			0.014	0.955	2.8	3	-0.2	0.870551		TECTA	TECTA	tectorin alpha	---	0007160 // cell-matrix adhesion // inferred from electronic annotation /// 0007605 // sensory perception of sound // inferred from electronic annotation /// 0007605 // sensory perception of sound // traceable author statement	0005201 // extracellular matrix structural constituent // inferred from electronic annotation	11	11q	1.21017e+08
1563577_at			0.014	0.955	4.5	4.7	-0.2	0.870551		---	---	---	---	---	---	4	4q	165847122
1566824_at			0.014	0.955	3.4	3.6	-0.2	0.870551		---	---	---	---	---	---	4	4q	8.65984e+07
215746_at			0.014	0.955	2.1	2.3	-0.2	0.870551		---	---	---	---	---	---	4	4p	2960238
39582_at			0.014	0.955	6.8	7	-0.2	0.870551		CYLD	CYLD	cylindromatosis (turban tumor syndrome)	---	0006412 // translation // inferred from electronic annotation /// 0006511 // ubiquitin-dependent protein catabolic process // inferred from electronic annotation /// 0007049 // cell cycle // inferred from electronic annotation /// 0007346 // regulation of mitotic cell cycle // inferred from mutant phenotype /// 0016055 // Wnt receptor signaling pathway // inferred from electronic annotation /// 0…	0003735 // structural constituent of ribosome // inferred from electronic annotation /// 0004221 // ubiquitin thiolesterase activity // inferred from electronic annotation /// 0004843 // ubiquitin-specific protease activity // inferred from direct assay /// 0005515 // protein binding // inferred from physical interaction /// 0005515 // protein binding // inferred from electronic annotation /// 00…	16	16q	5.08345e+07
231608_at			0.014	0.955	1.9	2.1	-0.2	0.870551		---	---	---	---	---	---	22	22q	35153429
233135_at			0.014	0.955	3.1	3.3	-0.2	0.870551		---	---	---	---	---	---	7	7q	1.0121e+08
1568899_at			0.015	0.955	2	2.1	-0.2	0.870551		---	---	---	---	---	---	17	17q	80249783
243757_at			0.015	0.955	3	3.2	-0.2	0.870551		---	---	---	---	---	---	7	7q	9.98319e+07
242978_x_at			0.015	0.955	4.9	5	-0.2	0.870551		---	---	---	---	---	---	1	1q	1.60956e+08
220446_s_at			0.015	0.955	3.3	3.5	-0.2	0.870551		CHST4	CHST4	carbohydrate (N-acetylglucosamine 6-O) sulfotransferase 4	---	0005975 // carbohydrate metabolic process // inferred from electronic annotation /// 0006044 // N-acetylglucosamine metabolic process // inferred from direct assay /// 0006477 // protein sulfation // traceable author statement /// 0006790 // sulfur compound metabolic process // inferred from direct assay /// 0006928 // cellular component movement // traceable author statement /// 0006954 // infla…	0001517 // N-acetylglucosamine 6-O-sulfotransferase activity // inferred from direct assay /// 0008146 // sulfotransferase activity // traceable author statement /// 0008146 // sulfotransferase activity // inferred from electronic annotation /// 0016740 // transferase activity // inferred from electronic annotation	16	16q	71566238
203461_at			0.015	0.955	2.1	2.3	-0.2	0.870551		CHD2	CHD2	chromodomain helicase DNA binding protein 2	---	0006333 // chromatin assembly or disassembly // inferred from electronic annotation /// 0006357 // regulation of transcription from RNA polymerase II promoter // traceable author statement	0000166 // nucleotide binding // inferred from electronic annotation /// 0003676 // nucleic acid binding // inferred from electronic annotation /// 0003677 // DNA binding // inferred from electronic annotation /// 0003677 // DNA binding // traceable author statement /// 0003682 // chromatin binding // inferred from electronic annotation /// 0004003 // ATP-dependent DNA helicase activity // tracea…	15	15q	9.35041e+07
216651_s_at			0.015	0.955	2.9	3.1	-0.2	0.870551		GAD2	GAD2	glutamate decarboxylase 2 (pancreatic islets and brain. 65kDa)	Biogenic_Amine_Synthesis // GenMAPP	0006540 // glutamate decarboxylation to succinate // inferred from electronic annotation /// 0006540 // glutamate decarboxylation to succinate // traceable author statement /// 0007268 // synaptic transmission // traceable author statement /// 0019752 // carboxylic acid metabolic process // inferred from electronic annotation /// 0042136 // neurotransmitter biosynthetic process // inferred from e…	0003824 // catalytic activity // inferred from electronic annotation /// 0004351 // glutamate decarboxylase activity // inferred from electronic annotation /// 0005515 // protein binding // inferred from physical interaction /// 0016829 // lyase activity // inferred from electronic annotation /// 0016831 // carboxy-lyase activity // inferred from electronic annotation /// 0030170 // pyridoxal pho…	10	10p	2.65478e+07
228309_at			0.016	0.955	4.4	4.6	-0.2	0.870551		---	---	---	---	---	---	20	20p	2.49439e+07
223336_s_at			0.016	0.955	8.8	9	-0.2	0.870551		RAB18	RAB18	RAB18. member RAS oncogene family	---	0006355 // regulation of transcription. DNA-dependent // inferred from electronic annotation /// 0006810 // transport // inferred from electronic annotation /// 0006897 // endocytosis // non-traceable author statement /// 0007264 // small GTPase mediated signal transduction // non-traceable author statement /// 0007264 // small GTPase mediated signal transduction // inferred from electronic annot…	0000166 // nucleotide binding // inferred from electronic annotation /// 0003924 // GTPase activity // non-traceable author statement /// 0005524 // ATP binding // inferred from electronic annotation /// 0005525 // GTP binding // inferred from electronic annotation /// 0008134 // transcription factor binding // inferred from electronic annotation	10	10p	27811003
206674_at			0.016	0.955	2.8	3	-0.2	0.870551		FLT3	FLT3	fms-related tyrosine kinase 3	---	0002318 // myeloid progenitor cell differentiation // inferred from electronic annotation /// 0002320 // lymphoid progenitor cell differentiation // inferred from electronic annotation /// 0002328 // pro-B cell differentiation // inferred from electronic annotation /// 0002572 // pro-T cell differentiation // inferred from electronic annotation /// 0006468 // protein phosphorylation // inferred f…	0000166 // nucleotide binding // inferred from electronic annotation /// 0004672 // protein kinase activity // inferred from electronic annotation /// 0004713 // protein tyrosine kinase activity // inferred from electronic annotation /// 0004714 // transmembrane receptor protein tyrosine kinase activity // inferred from electronic annotation /// 0004872 // receptor activity // inferred from elect…	13	13q	2.86262e+07
1552964_at			0.016	0.955	3.2	3.4	-0.2	0.870551		C10orf93	C10orf93	chromosome 10 open reading frame 93	---	---	0005488 // binding // inferred from electronic annotation	10	10q	134749377
1570133_at			0.016	0.955	3.1	3.3	-0.2	0.870551		---	---	---	---	---	---	19	19p	15490771
242220_at			0.016	0.955	2.8	3	-0.2	0.870551		SPTBN1	SPTBN1	spectrin. beta. non-erythrocytic 1	---	0007182 // common-partner SMAD protein phosphorylation // inferred from electronic annotation /// 0007184 // SMAD protein nuclear translocation // inferred from electronic annotation /// 0051693 // actin filament capping // inferred from electronic annotation	0003779 // actin binding // inferred from electronic annotation /// 0003779 // actin binding // traceable author statement /// 0005200 // structural constituent of cytoskeleton // inferred from electronic annotation /// 0005200 // structural constituent of cytoskeleton // traceable author statement /// 0005515 // protein binding // inferred from physical interaction /// 0005515 // protein binding…	2	2p	5.48984e+07
1553253_at			0.016	0.955	5	5.2	-0.2	0.870551		ASB16	ASB16	ankyrin repeat and SOCS box-containing 16	---	0023034 // intracellular signaling pathway // inferred from electronic annotation	0005515 // protein binding // inferred from physical interaction	17	17q	4.22524e+07
237447_at			0.016	0.955	2.9	3.1	-0.2	0.870551		C22orf45	C22orf45	chromosome 22 open reading frame 45	---	---	---	22	22q	24825500
223951_at			0.016	0.955	2.2	2.4	-0.2	0.870551		C21orf116	C21orf116	chromosome 21 open reading frame 116	---	---	---	21	21q	1.64236e+07
1565082_x_at			0.017	0.955	3.3	3.5	-0.2	0.870551		SRC	SRC	v-src sarcoma (Schmidt-Ruppin A-2) viral oncogene homolog (avian)	Integrin-mediated_cell_adhesion_KEGG // GenMAPP	0001101 // response to acid // inferred from electronic annotation /// 0006468 // protein phosphorylation // inferred from electronic annotation /// 0006950 // response to stress // inferred from electronic annotation /// 0007165 // signal transduction // inferred from electronic annotation /// 0007165 // signal transduction // traceable author statement /// 0007172 // signal complex assembly // …	0000166 // nucleotide binding // inferred from electronic annotation /// 0004672 // protein kinase activity // inferred from direct assay /// 0004672 // protein kinase activity // inferred from electronic annotation /// 0004713 // protein tyrosine kinase activity // not recorded /// 0004713 // protein tyrosine kinase activity // inferred from electronic annotation /// 0004713 // protein tyrosine …	20	20q	3.59921e+07
1570388_a_at			0.017	0.955	2	2.2	-0.2	0.870551		LOC440896	LOC440896	hypothetical LOC440896	---	---	---	9	9q	69186999
231621_at			0.017	0.955	3.4	3.6	-0.2	0.870551		MPZL1	MPZL1	myelin protein zero-like 1	---	0007169 // transmembrane receptor protein tyrosine kinase signaling pathway // traceable author statement /// 0007267 // cell-cell signaling // traceable author statement	0005198 // structural molecule activity // traceable author statement /// 0005515 // protein binding // inferred from physical interaction	1	1q	167760917
220017_x_at			0.017	0.955	3	3.1	-0.2	0.870551		CYP2C9	CYP2C9	cytochrome P450. family 2. subfamily C. polypeptide 9	---	0008202 // steroid metabolic process // inferred from mutant phenotype /// 0016098 // monoterpenoid metabolic process // inferred from direct assay /// 0017144 // drug metabolic process // inferred from direct assay /// 0019627 // urea metabolic process // inferred from direct assay /// 0032787 // monocarboxylic acid metabolic process // inferred from direct assay /// 0042737 // drug catabolic pr…	0004497 // monooxygenase activity // inferred from direct assay /// 0004497 // monooxygenase activity // non-traceable author statement /// 0004497 // monooxygenase activity // inferred from electronic annotation /// 0005506 // iron ion binding // inferred from electronic annotation /// 0008144 // drug binding // inferred from direct assay /// 0008395 // steroid hydroxylase activity // inferred f…	10	10q	96723793
1561233_at			0.017	0.955	3.1	3.3	-0.2	0.870551		LOC283387	LOC283387	hypothetical protein LOC283387	---	---	---	12	12q	5.82769e+07
1559991_s_at			0.018	0.955	3	3.2	-0.2	0.870551		---	---	---	---	0007155 // cell adhesion // inferred from electronic annotation /// 0007160 // cell-matrix adhesion // inferred from mutant phenotype /// 0007346 // regulation of mitotic cell cycle // traceable author statement /// 0040008 // regulation of growth // inferred from electronic annotation	0005515 // protein binding // inferred from physical interaction	10	10p	1.28742e+07
229079_at			0.018	0.955	3.7	3.9	-0.2	0.870551		EHMT2	EHMT2	Euchromatic histone-lysine N-methyltransferase 2	---	0000122 // negative regulation of transcription from RNA polymerase II promoter // inferred from electronic annotation /// 0000239 // pachytene // inferred from electronic annotation /// 0006357 // regulation of transcription from RNA polymerase II promoter // inferred from electronic annotation /// 0007130 // synaptonemal complex assembly // inferred from electronic annotation /// 0007281 // ger…	0005515 // protein binding // inferred from physical interaction /// 0008168 // methyltransferase activity // inferred from electronic annotation /// 0008270 // zinc ion binding // inferred from electronic annotation /// 0016740 // transferase activity // inferred from electronic annotation /// 0018024 // histone-lysine N-methyltransferase activity // inferred from electronic annotation /// 00468…	6	6p	3.18627e+07
225989_at			0.018	0.955	6.2	6.4	-0.2	0.870551		HERC4	HERC4	hect domain and RLD 4	---	0006464 // protein modification process // inferred from electronic annotation /// 0007283 // spermatogenesis // inferred from electronic annotation /// 0030154 // cell differentiation // inferred from electronic annotation	0016874 // ligase activity // inferred from electronic annotation /// 0016881 // acid-amino acid ligase activity // inferred from electronic annotation	10	10q	69740900
220100_at			0.018	0.955	2.2	2.4	-0.2	0.870551		SLC22A11	SLC22A11	solute carrier family 22 (organic anion/urate transporter). member 11	---	0006810 // transport // inferred from electronic annotation /// 0006811 // ion transport // inferred from electronic annotation /// 0015711 // organic anion transport // inferred from direct assay /// 0046415 // urate metabolic process // inferred from mutant phenotype /// 0055085 // transmembrane transport // inferred from electronic annotation	0005215 // transporter activity // inferred from electronic annotation /// 0005452 // inorganic anion exchanger activity // inferred from direct assay /// 0005515 // protein binding // inferred from physical interaction /// 0008514 // organic anion transmembrane transporter activity // inferred from direct assay /// 0015347 // sodium-independent organic anion transmembrane transporter activity //…	11	11q	6.43312e+07
1562698_x_at			0.018	0.955	3.9	4.1	-0.2	0.870551		LOC339988	LOC339988	hypothetical LOC339988	---	---	---	4	4p	6.69081e+06
242530_at			0.018	0.955	2.7	3	-0.2	0.870551		SV2C	SV2C	synaptic vesicle glycoprotein 2C	---	0006810 // transport // inferred from electronic annotation /// 0006836 // neurotransmitter transport // inferred from electronic annotation /// 0055085 // transmembrane transport // inferred from electronic annotation	0005215 // transporter activity // inferred from electronic annotation	5	5q	75628883
234790_at			0.019	0.955	2.9	3.1	-0.2	0.870551		---	---	---	---	---	---	1	1p	60033836
1562896_at			0.019	0.955	5	5.2	-0.2	0.870551		TNRC18	TNRC18	trinucleotide repeat containing 18	---	---	0003677 // DNA binding // inferred from electronic annotation	7	7p	5.44707e+06
1558230_at			0.019	0.955	3.5	3.7	-0.2	0.870551		SF3B2	SF3B2	splicing factor 3b. subunit 2. 145kDa	mRNA_processing_Reactome // GenMAPP	0000398 // nuclear mRNA splicing. via spliceosome // inferred by curator /// 0006397 // mRNA processing // traceable author statement /// 0006397 // mRNA processing // inferred from electronic annotation /// 0008380 // RNA splicing // not recorded /// 0008380 // RNA splicing // inferred from electronic annotation /// 0008380 // RNA splicing // traceable author statement /// 0044419 // interspecie…	0003676 // nucleic acid binding // inferred from electronic annotation /// 0005515 // protein binding // inferred from physical interaction /// 0005515 // protein binding // inferred from electronic annotation	11	11q	6.58353e+07
210301_at			0.019	0.955	3.3	3.5	-0.2	0.870551		XDH	XDH	xanthine dehydrogenase	---	0007595 // lactation // inferred from electronic annotation /// 0009115 // xanthine catabolic process // inferred from direct assay /// 0030856 // regulation of epithelial cell differentiation // inferred from electronic annotation /// 0055114 // oxidation reduction // inferred from electronic annotation	0003824 // catalytic activity // inferred from electronic annotation /// 0004854 // xanthine dehydrogenase activity // inferred from electronic annotation /// 0004854 // xanthine dehydrogenase activity // traceable author statement /// 0004855 // xanthine oxidase activity // inferred from direct assay /// 0004855 // xanthine oxidase activity // inferred from electronic annotation /// 0005488 // b…	2	2p	31598150
232443_at			0.02	0.955	2.6	2.8	-0.2	0.870551		LOC441052	LOC441052	hypothetical LOC441052	---	---	---	4	4q	1.72735e+08
1559105_at			0.02	0.955	2	2.2	-0.2	0.870551		LEKR1	LEKR1	leucine. glutamate and lysine rich 1	---	---	---	3	3q	156591297
228127_at			0.02	0.955	4.9	5.1	-0.2	0.870551		KCNK3	KCNK3	potassium channel. subfamily K. member 3	---	0006810 // transport // inferred from electronic annotation /// 0006811 // ion transport // inferred from electronic annotation /// 0006813 // potassium ion transport // inferred from electronic annotation /// 0006813 // potassium ion transport // traceable author statement /// 0007268 // synaptic transmission // traceable author statement /// 0007420 // brain development // inferred from electro…	0005216 // ion channel activity // inferred from electronic annotation /// 0005244 // voltage-gated ion channel activity // inferred from electronic annotation /// 0005252 // open rectifier potassium channel activity // inferred from electronic annotation /// 0005267 // potassium channel activity // inferred from electronic annotation /// 0005267 // potassium channel activity // traceable author …	2	2p	2.69534e+07
1553430_a_at			0.02	0.955	2.6	2.7	-0.2	0.870551		EDARADD	EDARADD	EDAR-associated death domain	---	0001942 // hair follicle development // inferred from electronic annotation /// 0007165 // signal transduction // inferred from electronic annotation /// 0007275 // multicellular organismal development // inferred from electronic annotation /// 0030154 // cell differentiation // inferred from electronic annotation /// 0042475 // odontogenesis of dentine-containing tooth // inferred from electroni…	0005515 // protein binding // inferred from electronic annotation	1	1q	2.36603e+08
1568812_at			0.02	0.955	1.9	2.1	-0.2	0.870551		---	---	---	---	---	---	2	2q	2.01579e+08
1560921_at			0.02	0.955	4.4	4.6	-0.2	0.870551		ZNF169	ZNF169	zinc finger protein 169	---	0006350 // transcription // inferred from electronic annotation /// 0006355 // regulation of transcription. DNA-dependent // non-traceable author statement /// 0006355 // regulation of transcription. DNA-dependent // inferred from electronic annotation /// 0045449 // regulation of transcription // inferred from electronic annotation	0003676 // nucleic acid binding // inferred from electronic annotation /// 0003677 // DNA binding // inferred from electronic annotation /// 0003700 // sequence-specific DNA binding transcription factor activity // non-traceable author statement /// 0008270 // zinc ion binding // inferred from electronic annotation /// 0046872 // metal ion binding // inferred from electronic annotation	9	9q	9.70523e+07
209851_at			0.02	0.955	2.5	2.7	-0.2	0.870551		ZC3H13	ZC3H13	zinc finger CCCH-type containing 13	---	---	0003676 // nucleic acid binding // inferred from electronic annotation /// 0008270 // zinc ion binding // inferred from electronic annotation /// 0046872 // metal ion binding // inferred from electronic annotation	13	13q	4.65568e+07
215178_x_at			0.02	0.955	4.6	4.8	-0.2	0.870551		NAAA	NAAA	N-acylethanolamine acid amidase	---	0006629 // lipid metabolic process // inferred from electronic annotation	0016787 // hydrolase activity // inferred from electronic annotation	4	4q	7.68512e+07
203651_at			0.02	0.955	7.9	8.1	-0.2	0.870551		ZFYVE16	ZFYVE16	zinc finger. FYVE domain containing 16	---	0006622 // protein targeting to lysosome // inferred from mutant phenotype /// 0007165 // signal transduction // non-traceable author statement /// 0016050 // vesicle organization // non-traceable author statement /// 0016197 // endosome transport // inferred from mutant phenotype /// 0030100 // regulation of endocytosis // traceable author statement /// 0030509 // BMP signaling pathway // not re…	0005515 // protein binding // inferred from physical interaction /// 0005545 // phosphatidylinositol binding // inferred from direct assay /// 0005547 // phosphatidylinositol-3.4.5-trisphosphate binding // inferred from direct assay /// 0008270 // zinc ion binding // inferred from electronic annotation /// 0008565 // protein transporter activity // inferred from mutant phenotype /// 0046872 // me…	5	5q	79739425
229445_at			0.02	0.955	4	4.2	-0.2	0.870551		CYBA	CYBA	cytochrome b-245. alpha polypeptide	---	0006801 // superoxide metabolic process // inferred from mutant phenotype /// 0006801 // superoxide metabolic process // inferred from electronic annotation /// 0006810 // transport // inferred from electronic annotation /// 0006954 // inflammatory response // inferred from mutant phenotype /// 0008217 // regulation of blood pressure // inferred from electronic annotation /// 0014895 // smooth mu…	0005515 // protein binding // inferred from physical interaction /// 0005515 // protein binding // inferred from electronic annotation /// 0009055 // electron carrier activity // inferred from direct assay /// 0009055 // electron carrier activity // traceable author statement /// 0016175 // superoxide-generating NADPH oxidase activity // inferred from mutant phenotype /// 0016175 // superoxide-ge…	16	16q	8.87105e+07
1561538_at			0.02	0.955	3.1	3.3	-0.2	0.870551		---	---	---	---	---	---	3	3p	1.4461e+07
1563792_at			0.02	0.955	3.5	3.7	-0.2	0.870551		---	---	---	---	---	---	14	14q	103397457
216661_x_at			0.02	0.955	2.8	3	-0.2	0.870551		CYP2C9	CYP2C9	cytochrome P450. family 2. subfamily C. polypeptide 9	---	0008202 // steroid metabolic process // inferred from mutant phenotype /// 0016098 // monoterpenoid metabolic process // inferred from direct assay /// 0017144 // drug metabolic process // inferred from direct assay /// 0019627 // urea metabolic process // inferred from direct assay /// 0032787 // monocarboxylic acid metabolic process // inferred from direct assay /// 0042737 // drug catabolic pr…	0004497 // monooxygenase activity // inferred from direct assay /// 0004497 // monooxygenase activity // non-traceable author statement /// 0004497 // monooxygenase activity // inferred from electronic annotation /// 0005506 // iron ion binding // inferred from electronic annotation /// 0008144 // drug binding // inferred from direct assay /// 0008395 // steroid hydroxylase activity // inferred f…	10	10q	96723656
1554212_s_at			0.02	0.955	3.6	3.8	-0.2	0.870551		KCNS2	KCNS2	potassium voltage-gated channel. delayed-rectifier. subfamily S. member 2	---	0006810 // transport // inferred from electronic annotation /// 0006811 // ion transport // inferred from electronic annotation /// 0006813 // potassium ion transport // inferred from electronic annotation /// 0055085 // transmembrane transport // inferred from electronic annotation	0005216 // ion channel activity // inferred from electronic annotation /// 0005244 // voltage-gated ion channel activity // inferred from electronic annotation /// 0005249 // voltage-gated potassium channel activity // inferred from electronic annotation /// 0005267 // potassium channel activity // inferred from electronic annotation /// 0005515 // protein binding // inferred from electronic anno…	8	8q	99441135
229219_s_at			0.02	0.955	4.7	4.9	-0.2	0.870551		---	---	---	---	---	---	16	16p	1.51409e+07
1554950_at			0.021	0.955	2.4	2.6	-0.2	0.870551		ACAN	ACAN	aggrecan	---	0001501 // skeletal system development // non-traceable author statement /// 0001502 // cartilage condensation // inferred from electronic annotation /// 0002063 // chondrocyte development // inferred from electronic annotation /// 0006508 // proteolysis // non-traceable author statement /// 0007155 // cell adhesion // inferred from electronic annotation /// 0030166 // proteoglycan biosynthetic p…	0005201 // extracellular matrix structural constituent // traceable author statement /// 0005488 // binding // inferred from electronic annotation /// 0005515 // protein binding // inferred from physical interaction /// 0005515 // protein binding // inferred from electronic annotation /// 0005529 // sugar binding // inferred from electronic annotation /// 0005540 // hyaluronic acid binding // inf…	15	15q	89370732
224907_s_at			0.021	0.955	4.8	4.9	-0.2	0.870551		SH3GLB2	SH3GLB2	SH3-domain GRB2-like endophilin B2	---	0007165 // signal transduction // inferred from electronic annotation /// 0046847 // filopodium assembly // inferred from electronic annotation	0005515 // protein binding // inferred from physical interaction /// 0005515 // protein binding // inferred from electronic annotation /// 0008093 // cytoskeletal adaptor activity // inferred from electronic annotation /// 0017124 // SH3 domain binding // inferred from electronic annotation	9	9q	131771806
234773_x_at			0.021	0.955	2.6	2.8	-0.2	0.870551		---	---	---	---	---	---	4	4q	172213692
1557325_at			0.021	0.955	3.2	3.4	-0.2	0.870551		---	---	---	---	---	---	19	19p	16970725
1552884_at			0.021	0.955	2.8	3	-0.2	0.870551		NKX6-3	NKX6-3	NK6 homeobox 3	---	0006350 // transcription // inferred from electronic annotation /// 0006355 // regulation of transcription. DNA-dependent // inferred from electronic annotation /// 0045449 // regulation of transcription // inferred from electronic annotation	0003677 // DNA binding // inferred from electronic annotation /// 0003700 // sequence-specific DNA binding transcription factor activity // inferred from electronic annotation /// 0030528 // transcription regulator activity // inferred from electronic annotation /// 0043565 // sequence-specific DNA binding // inferred from electronic annotation	8	8p	41503787
209118_s_at			0.021	0.955	12.5	12.7	-0.2	0.870551		TUBA1A	TUBA1A	tubulin. alpha 1a	---	0007017 // microtubule-based process // inferred from electronic annotation /// 0007018 // microtubule-based movement // inferred from electronic annotation /// 0051258 // protein polymerization // inferred from electronic annotation	0000166 // nucleotide binding // inferred from electronic annotation /// 0003924 // GTPase activity // inferred from electronic annotation /// 0005198 // structural molecule activity // inferred from electronic annotation /// 0005525 // GTP binding // inferred from electronic annotation /// 0019904 // protein domain specific binding // inferred from electronic annotation	12	12q	4.95807e+07
215809_at			0.021	0.955	4.7	4.9	-0.2	0.870551		CYP2D6	CYP2D6	cytochrome P450. family 2. subfamily D. polypeptide 6	---	0006805 // xenobiotic metabolic process // traceable author statement /// 0008202 // steroid metabolic process // inferred from mutant phenotype /// 0009804 // coumarin metabolic process // inferred from direct assay /// 0009820 // alkaloid metabolic process // inferred from direct assay /// 0009822 // alkaloid catabolic process // inferred from direct assay /// 0009892 // negative regulation of …	0004497 // monooxygenase activity // inferred from direct assay /// 0004497 // monooxygenase activity // inferred from electronic annotation /// 0005506 // iron ion binding // inferred from electronic annotation /// 0008144 // drug binding // inferred from direct assay /// 0009055 // electron carrier activity // inferred from electronic annotation /// 0016491 // oxidoreductase activity // inferre…	22	22q	42537175
213619_at			0.022	0.955	11.4	11.5	-0.2	0.870551		HNRNPH1	HNRNPH1	Heterogeneous nuclear ribonucleoprotein H1 (H)	mRNA_processing_Reactome // GenMAPP	0006396 // RNA processing // traceable author statement /// 0006397 // mRNA processing // inferred from electronic annotation /// 0008380 // RNA splicing // not recorded /// 0008380 // RNA splicing // inferred from electronic annotation /// 0043484 // regulation of RNA splicing // inferred from direct assay	0000166 // nucleotide binding // inferred from electronic annotation /// 0003676 // nucleic acid binding // inferred from electronic annotation /// 0003723 // RNA binding // inferred from direct assay /// 0003723 // RNA binding // inferred from electronic annotation /// 0005515 // protein binding // inferred from physical interaction /// 0008266 // poly(U) RNA binding // traceable author statement	5	5q	179041509
1555823_at			0.022	0.955	7.8	8	-0.2	0.870551		PACS2	PACS2	phosphofurin acidic cluster sorting protein 2	---	0006915 // apoptosis // inferred from electronic annotation /// 0044419 // interspecies interaction between organisms // inferred from electronic annotation	---	14	14q	1.05863e+08
214272_at			0.022	0.955	4.5	4.8	-0.2	0.870551		CYLD	CYLD	cylindromatosis (turban tumor syndrome)	---	0006412 // translation // inferred from electronic annotation /// 0006511 // ubiquitin-dependent protein catabolic process // inferred from electronic annotation /// 0007049 // cell cycle // inferred from electronic annotation /// 0007346 // regulation of mitotic cell cycle // inferred from mutant phenotype /// 0016055 // Wnt receptor signaling pathway // inferred from electronic annotation /// 0…	0003735 // structural constituent of ribosome // inferred from electronic annotation /// 0004221 // ubiquitin thiolesterase activity // inferred from electronic annotation /// 0004843 // ubiquitin-specific protease activity // inferred from direct assay /// 0005515 // protein binding // inferred from physical interaction /// 0005515 // protein binding // inferred from electronic annotation /// 00…	16	16q	5.08331e+07
59999_at			0.023	0.955	5.5	5.6	-0.2	0.870551		HIF1AN	HIF1AN	hypoxia inducible factor 1. alpha subunit inhibitor	---	0006350 // transcription // inferred from electronic annotation /// 0045449 // regulation of transcription // inferred from electronic annotation /// 0055114 // oxidation reduction // inferred from electronic annotation	0004597 // peptide-aspartate beta-dioxygenase activity // inferred from electronic annotation /// 0005515 // protein binding // inferred from physical interaction /// 0016491 // oxidoreductase activity // inferred from electronic annotation /// 0016702 // oxidoreductase activity. acting on single donors with incorporation of molecular oxygen. incorporation of two atoms of oxygen // inferred from …	10	10q	1.02309e+08
235921_at			0.023	0.955	2.7	2.9	-0.2	0.870551		---	---	---	---	---	---	10	10p	6.78061e+06
239325_at			0.023	0.955	2.4	2.6	-0.2	0.870551		LOC729723	LOC729723	hypothetical LOC729723	---	---	---	2	2p	2.52597e+07
201156_s_at			0.023	0.955	6.7	6.9	-0.2	0.870551		RAB5C	RAB5C	RAB5C. member RAS oncogene family	---	0006810 // transport // inferred from electronic annotation /// 0007032 // endosome organization // inferred from electronic annotation /// 0007264 // small GTPase mediated signal transduction // inferred from electronic annotation /// 0015031 // protein transport // inferred from electronic annotation /// 0030100 // regulation of endocytosis // inferred from electronic annotation	0000166 // nucleotide binding // inferred from electronic annotation /// 0003924 // GTPase activity // traceable author statement /// 0005515 // protein binding // inferred from physical interaction /// 0005525 // GTP binding // inferred from electronic annotation	17	17q	4.0292e+07
221817_at			0.023	0.955	6.6	6.8	-0.2	0.870551		DOLPP1	DOLPP1	dolichyl pyrophosphate phosphatase 1	---	0006487 // protein N-linked glycosylation // inferred from sequence or structural similarity /// 0006487 // protein N-linked glycosylation // inferred from electronic annotation /// 0006488 // dolichol-linked oligosaccharide biosynthetic process // not recorded	0003824 // catalytic activity // inferred from electronic annotation /// 0016787 // hydrolase activity // inferred from electronic annotation /// 0047874 // dolichyldiphosphatase activity // not recorded /// 0047874 // dolichyldiphosphatase activity // inferred from sequence or structural similarity /// 0047874 // dolichyldiphosphatase activity // inferred from electronic annotation	9	9q	131848066
222075_s_at			0.023	0.955	3.6	3.8	-0.2	0.870551		OAZ3	OAZ3	ornithine decarboxylase antizyme 3	---	0007283 // spermatogenesis // traceable author statement	0004857 // enzyme inhibitor activity // inferred from electronic annotation /// 0005515 // protein binding // inferred from electronic annotation /// 0008073 // ornithine decarboxylase inhibitor activity // inferred from electronic annotation /// 0008073 // ornithine decarboxylase inhibitor activity // traceable author statement	1	1q	151741721
214145_s_at			0.023	0.955	3.8	4	-0.2	0.870551		SPTB	SPTB	spectrin. beta. erythrocytic	---	0006779 // porphyrin biosynthetic process // inferred from electronic annotation /// 0051693 // actin filament capping // inferred from electronic annotation	0003779 // actin binding // traceable author statement /// 0003779 // actin binding // inferred from electronic annotation /// 0005200 // structural constituent of cytoskeleton // inferred from electronic annotation /// 0005515 // protein binding // inferred from physical interaction /// 0051015 // actin filament binding // inferred from direct assay	14	14q	65213397
244666_at			0.023	0.955	3.2	3.4	-0.2	0.870551		---	---	---	---	---	---	17	17p	1.90466e+07
232577_at			0.023	0.955	3.2	3.4	-0.2	0.870551		LOC145945	LOC145945	hypothetical protein LOC145945	---	---	---	15	15q	9.73075e+07
220867_s_at			0.023	0.955	2.7	2.9	-0.2	0.870551		SLC24A2	SLC24A2	solute carrier family 24 (sodium/potassium/calcium exchanger). member 2	---	0006810 // transport // inferred from electronic annotation /// 0006811 // ion transport // inferred from electronic annotation /// 0006813 // potassium ion transport // inferred from electronic annotation /// 0006814 // sodium ion transport // inferred from electronic annotation /// 0006816 // calcium ion transport // inferred from electronic annotation /// 0006874 // cellular calcium ion homeos…	0005262 // calcium channel activity // inferred from electronic annotation /// 0015293 // symporter activity // inferred from electronic annotation /// 0015297 // antiporter activity // inferred from electronic annotation /// 0046983 // protein dimerization activity // inferred from electronic annotation	9	9p	1.96515e+07
231945_at			0.023	0.955	3.3	3.5	-0.2	0.870551		FILIP1	FILIP1	filamin A interacting protein 1	---	---	---	6	6q	76045260
229805_at			0.023	0.955	4	4.1	-0.2	0.870551		ZDHHC22	ZDHHC22	Zinc finger. DHHC-type containing 22	---	---	0008270 // zinc ion binding // inferred from electronic annotation /// 0008415 // acyltransferase activity // inferred from electronic annotation /// 0016740 // transferase activity // inferred from electronic annotation /// 0046872 // metal ion binding // inferred from electronic annotation	14	14q	7.7598e+07
222183_x_at			0.023	0.955	5.3	5.5	-0.2	0.870551		SNW1	SNW1	SNW domain containing 1	---	0000398 // nuclear mRNA splicing. via spliceosome // inferred from direct assay /// 0000398 // nuclear mRNA splicing. via spliceosome // inferred from electronic annotation /// 0006357 // regulation of transcription from RNA polymerase II promoter // traceable author statement /// 0006397 // mRNA processing // inferred from electronic annotation /// 0008380 // RNA splicing // inferred from electr…	0004872 // receptor activity // inferred from electronic annotation /// 0005112 // Notch binding // inferred from physical interaction /// 0005515 // protein binding // inferred from physical interaction /// 0005515 // protein binding // inferred from electronic annotation /// 0016564 // transcription repressor activity // inferred from direct assay	19	19p	1.57432e+06
1560563_at			0.024	0.955	2.5	2.7	-0.2	0.870551		---	---	---	---	---	---	17	17q	8.0673e+07
213854_at			0.024	0.955	4.2	4.3	-0.2	0.870551		SYNGR1	SYNGR1	synaptogyrin 1	---	0006605 // protein targeting // inferred from electronic annotation /// 0048169 // regulation of long-term neuronal synaptic plasticity // inferred from sequence or structural similarity /// 0048169 // regulation of long-term neuronal synaptic plasticity // inferred from electronic annotation /// 0048172 // regulation of short-term neuronal synaptic plasticity // inferred from sequence or structu…	---	22	22q	39767280
213604_at			0.024	0.955	7.3	7.5	-0.2	0.870551		TCEB3	TCEB3	transcription elongation factor B (SIII). polypeptide 3 (110kDa. elongin A)	---	0006350 // transcription // inferred from electronic annotation /// 0006354 // RNA elongation // inferred from electronic annotation /// 0006355 // regulation of transcription. DNA-dependent // inferred from electronic annotation /// 0006357 // regulation of transcription from RNA polymerase II promoter // inferred from electronic annotation /// 0006357 // regulation of transcription from RNA pol…	0003677 // DNA binding // inferred from electronic annotation /// 0003702 // RNA polymerase II transcription factor activity // inferred from electronic annotation /// 0003746 // translation elongation factor activity // inferred from electronic annotation /// 0005515 // protein binding // inferred from electronic annotation /// 0016944 // RNA polymerase II transcription elongation factor activit…	1	1p	2.40877e+07
1554201_at			0.024	0.955	4.8	5	-0.2	0.870551		CABP4	CABP4	calcium binding protein 4	---	0007165 // signal transduction // non-traceable author statement /// 0007601 // visual perception // inferred from mutant phenotype /// 0007602 // phototransduction // inferred from electronic annotation /// 0008594 // photoreceptor cell morphogenesis // inferred from electronic annotation /// 0046549 // retinal cone cell development // inferred from electronic annotation /// 0060040 // retinal b…	0005509 // calcium ion binding // non-traceable author statement /// 0005509 // calcium ion binding // traceable author statement /// 0005509 // calcium ion binding // inferred from electronic annotation	11	11q	67223269
219302_s_at			0.024	0.955	1.8	2	-0.2	0.870551		CNTNAP2	CNTNAP2	contactin associated protein-like 2	---	0007155 // cell adhesion // inferred from electronic annotation /// 0007165 // signal transduction // inferred from electronic annotation /// 0007420 // brain development // traceable author statement /// 0007610 // behavior // inferred from mutant phenotype /// 0008038 // neuron recognition // non-traceable author statement /// 0019226 // transmission of nerve impulse // non-traceable author sta…	0005102 // receptor binding // inferred from electronic annotation	7	7q	146963680
212112_s_at			0.025	0.955	9.1	9.3	-0.2	0.870551		STX12	STX12	syntaxin 12	---	0006810 // transport // inferred from electronic annotation /// 0006886 // intracellular protein transport // inferred from electronic annotation /// 0015031 // protein transport // inferred from electronic annotation /// 0016192 // vesicle-mediated transport // inferred from electronic annotation /// 0033344 // cholesterol efflux // inferred from direct assay /// 0050821 // protein stabilization…	0005484 // SNAP receptor activity // inferred from electronic annotation /// 0005515 // protein binding // inferred from physical interaction /// 0005515 // protein binding // inferred from electronic annotation	1	1p	2.81253e+07
222927_s_at			0.025	0.955	3.5	3.7	-0.2	0.870551		CPLX3	CPLX3 /// LMAN1L	complexin 3 /// lectin. mannose-binding. 1 like	---	0006810 // transport // inferred from electronic annotation /// 0006836 // neurotransmitter transport // inferred from electronic annotation /// 0006887 // exocytosis // inferred from electronic annotation /// 0016079 // synaptic vesicle exocytosis // inferred from electronic annotation /// 0030073 // insulin secretion // inferred from electronic annotation /// 0046928 // regulation of neurotrans…	0000149 // SNARE binding // inferred from electronic annotation /// 0005326 // neurotransmitter transporter activity // inferred from electronic annotation /// 0005529 // sugar binding // inferred from electronic annotation /// 0019905 // syntaxin binding // inferred from electronic annotation	15	15q	75121543
1552272_a_at			0.025	0.955	3.3	3.5	-0.2	0.870551		PRR22	PRR22	proline rich 22	---	---	---	19	19p	5783790
234469_at			0.025	0.955	2.4	2.5	-0.2	0.870551		OR51B4	OR51B4	olfactory receptor. family 51. subfamily B. member 4	---	0007165 // signal transduction // inferred from electronic annotation /// 0007186 // G-protein coupled receptor protein signaling pathway // inferred from electronic annotation /// 0007608 // sensory perception of smell // non-traceable author statement /// 0007608 // sensory perception of smell // inferred from electronic annotation /// 0050896 // response to stimulus // inferred from electronic…	0004871 // signal transducer activity // inferred from electronic annotation /// 0004872 // receptor activity // inferred from electronic annotation /// 0004930 // G-protein coupled receptor activity // inferred from electronic annotation /// 0004984 // olfactory receptor activity // non-traceable author statement /// 0004984 // olfactory receptor activity // inferred from electronic annotation	11	11p	5.32271e+06
222328_x_at			0.026	0.955	2.5	2.7	-0.2	0.870551		MEG3	MEG3	Maternally expressed 3 (non-protein coding)	---	---	---	14	14q	1.01317e+08
1556078_at			0.026	0.955	2.5	2.6	-0.2	0.870551		LOC100289632	LOC100289632	Hypothetical protein LOC100289632	---	---	---	10	10q	102728896
211624_s_at			0.026	0.955	4	4.2	-0.2	0.870551		DRD2	DRD2	dopamine receptor D2	GPCRDB_Class_A_Rhodopsin-like // GenMAPP /// Monoamine_GPCRs // GenMAPP	0001659 // temperature homeostasis // inferred from sequence or structural similarity /// 0001659 // temperature homeostasis // inferred from electronic annotation /// 0001666 // response to hypoxia // inferred from electronic annotation /// 0001963 // synaptic transmission. dopaminergic // inferred from electronic annotation /// 0001964 // startle response // inferred from electronic annotation …	0001591 // dopamine receptor activity. coupled via Gi/Go // inferred from direct assay /// 0001591 // dopamine receptor activity. coupled via Gi/Go // inferred from electronic annotation /// 0001670 // dopamine D2 receptor activity // inferred from direct assay /// 0001670 // dopamine D2 receptor activity // inferred from electronic annotation /// 0004871 // signal transducer activity // inferred…	11	11q	1.13314e+08
230095_at			0.026	0.955	3.6	3.8	-0.2	0.870551		---	---	---	---	---	---	10	10q	1.31981e+08
1553602_at			0.026	0.955	3	3.2	-0.2	0.870551		MUCL1	MUCL1	mucin-like 1	---	---	---	12	12q	5.52502e+07
204757_s_at			0.026	0.955	5	5.3	-0.2	0.870551		C2CD2L	C2CD2L	C2CD2-like	---	---	---	11	11q	118983913
1562930_at			0.027	0.955	3.1	3.2	-0.2	0.870551		LOC100128788	LOC100128788	hypothetical LOC100128788	---	---	---	16	16p	2.79095e+06
208788_at			0.027	0.955	10.4	10.6	-0.2	0.870551		ELOVL5	ELOVL5	ELOVL family member 5. elongation of long chain fatty acids (FEN1/Elo2. SUR4/Elo3-like. yeast)	---	0006633 // fatty acid biosynthetic process // inferred from electronic annotation /// 0008610 // lipid biosynthetic process // inferred from electronic annotation /// 0019432 // triglyceride biosynthetic process // not recorded	0009922 // fatty acid elongase activity // not recorded	6	6p	5.3173e+07
232781_at			0.027	0.955	2.5	2.7	-0.2	0.870551		---	---	---	---	---	---	1	1q	180246600
1553478_at			0.027	0.955	2.3	2.4	-0.2	0.870551		NCRNA00288	NCRNA00288	non-protein coding RNA 288	---	---	---	11	11q	1.26874e+08
224144_at			0.027	0.955	3.5	3.7	-0.2	0.870551		SPTBN4	SPTBN4	spectrin. beta. non-erythrocytic 4	---	0007016 // cytoskeletal anchoring at plasma membrane // traceable author statement /// 0016192 // vesicle-mediated transport // traceable author statement /// 0051693 // actin filament capping // inferred from electronic annotation	0003779 // actin binding // traceable author statement /// 0003779 // actin binding // inferred from electronic annotation /// 0005200 // structural constituent of cytoskeleton // traceable author statement /// 0005200 // structural constituent of cytoskeleton // inferred from electronic annotation /// 0005515 // protein binding // inferred from physical interaction /// 0030506 // ankyrin binding…	19	19q	4.10515e+07
1559795_at			0.028	0.955	4.5	4.7	-0.2	0.870551		---	---	---	---	---	---	20	20p	25022449
220135_s_at			0.028	0.955	3.1	3.3	-0.2	0.870551		SLC7A9	SLC7A9	solute carrier family 7 (cationic amino acid transporter. y+ system). member 9	---	0006461 // protein complex assembly // traceable author statement /// 0006520 // cellular amino acid metabolic process // traceable author statement /// 0006810 // transport // traceable author statement /// 0006810 // transport // inferred from electronic annotation /// 0006865 // amino acid transport // not recorded /// 0006865 // amino acid transport // inferred from electronic annotation /// …	0015171 // amino acid transmembrane transporter activity // traceable author statement /// 0015171 // amino acid transmembrane transporter activity // inferred from electronic annotation /// 0015175 // neutral amino acid transmembrane transporter activity // inferred from sequence or structural similarity /// 0015184 // L-cystine transmembrane transporter activity // traceable author statement //…	19	19q	33341034
242124_at			0.028	0.955	3.5	3.7	-0.2	0.870551		---	---	---	---	---	---	11	11p	45669439
210552_s_at			0.028	0.955	3.2	3.4	-0.2	0.870551		RALGPS1	RALGPS1	Ral GEF with PH domain and SH3 binding motif 1	---	0007264 // small GTPase mediated signal transduction // inferred from electronic annotation /// 0023034 // intracellular signaling pathway // non-traceable author statement	0005085 // guanyl-nucleotide exchange factor activity // non-traceable author statement /// 0005085 // guanyl-nucleotide exchange factor activity // inferred from electronic annotation	9	9q	129852058
240771_at			0.028	0.955	2	2.3	-0.2	0.870551		C1orf101	C1orf101	chromosome 1 open reading frame 101	---	---	---	1	1q	244792244
1564822_at			0.028	0.955	2.4	2.6	-0.2	0.870551		---	---	---	---	---	---	2	2q	9.89903e+07
220684_at			0.029	0.955	3	3.2	-0.2	0.870551		TBX21	TBX21	T-box 21	---	0006350 // transcription // inferred from electronic annotation /// 0006355 // regulation of transcription. DNA-dependent // traceable author statement /// 0006355 // regulation of transcription. DNA-dependent // inferred from electronic annotation /// 0007275 // multicellular organismal development // traceable author statement /// 0045449 // regulation of transcription // inferred from electron…	0003677 // DNA binding // inferred from electronic annotation /// 0003700 // sequence-specific DNA binding transcription factor activity // traceable author statement /// 0003700 // sequence-specific DNA binding transcription factor activity // inferred from electronic annotation	17	17q	45817047
1556222_at			0.029	0.955	2.4	2.5	-0.2	0.870551		SEPT7L	SEPT7L	septin 7-like	---	0007049 // cell cycle // inferred from electronic annotation	0000166 // nucleotide binding // inferred from electronic annotation /// 0005525 // GTP binding // inferred from electronic annotation	10	10p	3.86819e+07
1562899_at			0.029	0.955	2.7	2.9	-0.2	0.870551		---	---	---	---	---	---	16	16q	47311133
206043_s_at			0.029	0.955	2.5	2.7	-0.2	0.870551		ATP2C2	ATP2C2	ATPase. Ca++ transporting. type 2C. member 2	---	0006754 // ATP biosynthetic process // inferred from electronic annotation /// 0006810 // transport // inferred from electronic annotation /// 0006811 // ion transport // inferred from electronic annotation /// 0006812 // cation transport // inferred from electronic annotation /// 0006816 // calcium ion transport // inferred from electronic annotation /// 0008152 // metabolic process // inferred …	0000166 // nucleotide binding // inferred from electronic annotation /// 0003824 // catalytic activity // inferred from electronic annotation /// 0005388 // calcium-transporting ATPase activity // inferred from electronic annotation /// 0005524 // ATP binding // inferred from electronic annotation /// 0015662 // ATPase activity. coupled to transmembrane movement of ions. phosphorylative mechanism…	16	16q	84467819
210199_at			0.029	0.955	3	3.2	-0.2	0.870551		CRYAA	CRYAA	crystallin. alpha A	---	0000072 // M phase specific microtubule process // inferred from electronic annotation /// 0001666 // response to hypoxia // inferred from electronic annotation /// 0001934 // positive regulation of protein phosphorylation // inferred from electronic annotation /// 0002088 // lens development in camera-type eye // inferred from electronic annotation /// 0002089 // lens morphogenesis in camera-typ…	0005212 // structural constituent of eye lens // inferred from electronic annotation /// 0005515 // protein binding // inferred from physical interaction /// 0005515 // protein binding // inferred from electronic annotation /// 0051082 // unfolded protein binding // inferred from mutant phenotype /// 0051082 // unfolded protein binding // inferred from physical interaction	21	21q	44590908
238836_at			0.029	0.955	3	3.2	-0.2	0.870551		---	---	---	---	---	---	10	10q	6.01599e+07
212111_at			0.029	0.955	8.8	9	-0.2	0.870551		STX12	STX12	syntaxin 12	---	0006810 // transport // inferred from electronic annotation /// 0006886 // intracellular protein transport // inferred from electronic annotation /// 0015031 // protein transport // inferred from electronic annotation /// 0016192 // vesicle-mediated transport // inferred from electronic annotation /// 0033344 // cholesterol efflux // inferred from direct assay /// 0050821 // protein stabilization…	0005484 // SNAP receptor activity // inferred from electronic annotation /// 0005515 // protein binding // inferred from physical interaction /// 0005515 // protein binding // inferred from electronic annotation	1	1p	2.81253e+07
205274_at			0.029	0.955	2.6	2.7	-0.2	0.870551		GTPBP1	GTPBP1	GTP binding protein 1	---	0006955 // immune response // traceable author statement /// 0007165 // signal transduction // traceable author statement	0000166 // nucleotide binding // inferred from electronic annotation /// 0003924 // GTPase activity // inferred from electronic annotation /// 0005525 // GTP binding // inferred from electronic annotation /// 0005525 // GTP binding // traceable author statement	22	22q	3.91145e+07
204810_s_at			0.03	0.955	2.3	2.5	-0.2	0.870551		CKM	CKM	creatine kinase. muscle	---	0006600 // creatine metabolic process // not recorded /// 0046314 // phosphocreatine biosynthetic process // inferred from electronic annotation	0000166 // nucleotide binding // inferred from electronic annotation /// 0003824 // catalytic activity // inferred from electronic annotation /// 0004111 // creatine kinase activity // inferred from electronic annotation /// 0004111 // creatine kinase activity // traceable author statement /// 0005524 // ATP binding // inferred from electronic annotation /// 0016301 // kinase activity // inferred…	19	19q	4.58179e+07
1562625_at			0.031	0.955	2.5	2.7	-0.2	0.870551		FRYL	FRYL	FRY-like	---	0006350 // transcription // inferred from electronic annotation /// 0045449 // regulation of transcription // inferred from electronic annotation	0005488 // binding // inferred from electronic annotation /// 0005515 // protein binding // inferred from physical interaction /// 0005515 // protein binding // inferred from electronic annotation	4	4p	4.87106e+07
1570131_at			0.031	0.955	2.4	2.6	-0.2	0.870551		LOC285847	LOC285847	hypothetical LOC285847	---	---	---	6	6p	35699098
212640_at			0.031	0.955	8.2	8.4	-0.2	0.870551		PTPLB	PTPLB	protein tyrosine phosphatase-like (proline instead of catalytic arginine). member b	---	0006633 // fatty acid biosynthetic process // inferred from electronic annotation /// 0008610 // lipid biosynthetic process // inferred from electronic annotation	0005515 // protein binding // inferred from physical interaction /// 0016829 // lyase activity // inferred from electronic annotation	3	3q	123211084
238543_x_at			0.032	0.955	4.3	4.5	-0.2	0.870551		MDGA1	MDGA1	MAM domain containing glycosylphosphatidylinositol anchor 1	---	0001764 // neuron migration // inferred from sequence or structural similarity /// 0007275 // multicellular organismal development // inferred from electronic annotation /// 0007399 // nervous system development // inferred from electronic annotation /// 0007420 // brain development // inferred from sequence or structural similarity /// 0007420 // brain development // inferred from electronic ann…	---	6	6p	3.76012e+07
226277_at			0.032	0.955	7.5	7.7	-0.2	0.870551		COL4A3BP	COL4A3BP	collagen. type IV. alpha 3 (Goodpasture antigen) binding protein	---	0000902 // cell morphogenesis // inferred from electronic annotation /// 0001701 // in utero embryonic development // inferred from electronic annotation /// 0003007 // heart morphogenesis // inferred from electronic annotation /// 0006468 // protein phosphorylation // traceable author statement /// 0006672 // ceramide metabolic process // inferred from electronic annotation /// 0006810 // transp…	0004672 // protein kinase activity // traceable author statement /// 0005515 // protein binding // inferred from physical interaction /// 0016301 // kinase activity // inferred from electronic annotation	5	5q	7.46676e+07
208184_s_at			0.032	0.955	4.6	4.7	-0.2	0.870551		TRAPPC10	TRAPPC10	trafficking protein particle complex 10	---	0006810 // transport // inferred from electronic annotation /// 0006814 // sodium ion transport // traceable author statement /// 0016192 // vesicle-mediated transport // inferred from electronic annotation	0005488 // binding // inferred from electronic annotation /// 0015081 // sodium ion transmembrane transporter activity // traceable author statement	21	21q	45478429
209594_x_at			0.032	0.955	2.6	2.8	-0.2	0.870551		PSG9	PSG9	pregnancy specific beta-1-glycoprotein 9	---	0006952 // defense response // non-traceable author statement /// 0007565 // female pregnancy // traceable author statement /// 0007565 // female pregnancy // inferred from electronic annotation	---	19	19q	43765681
214824_at			0.033	0.955	2.6	2.8	-0.2	0.870551		---	---	---	---	0006810 // transport // inferred from electronic annotation /// 0006811 // ion transport // inferred from electronic annotation /// 0006816 // calcium ion transport // inferred from electronic annotation /// 0006816 // calcium ion transport // traceable author statement /// 0046541 // saliva secretion // inferred from electronic annotation /// 0051281 // positive regulation of release of sequeste…	0005216 // ion channel activity // inferred from electronic annotation /// 0005262 // calcium channel activity // inferred from electronic annotation /// 0005262 // calcium channel activity // traceable author statement /// 0005515 // protein binding // inferred from electronic annotation /// 0005515 // protein binding // inferred from physical interaction /// 0015279 // store-operated calcium ch…	3	3q	142484723
221077_at			0.033	0.955	3.1	3.3	-0.2	0.870551		ARMC4	ARMC4	armadillo repeat containing 4	---	---	0005488 // binding // inferred from electronic annotation	10	10p	2.82612e+07
202913_at			0.033	0.955	5.5	5.6	-0.2	0.870551		ARHGEF11	ARHGEF11	Rho guanine nucleotide exchange factor (GEF) 11	---	0000910 // cytokinesis // non-traceable author statement /// 0001558 // regulation of cell growth // non-traceable author statement /// 0006915 // apoptosis // not recorded /// 0006928 // cellular component movement // non-traceable author statement /// 0006941 // striated muscle contraction // non-traceable author statement /// 0007186 // G-protein coupled receptor protein signaling pathway // i…	0001664 // G-protein-coupled receptor binding // inferred from direct assay /// 0004871 // signal transducer activity // inferred from electronic annotation /// 0005085 // guanyl-nucleotide exchange factor activity // not recorded /// 0005085 // guanyl-nucleotide exchange factor activity // inferred from electronic annotation /// 0005089 // Rho guanyl-nucleotide exchange factor activity // tracea…	1	1q	1.5696e+08
36994_at			0.033	0.955	9.7	9.9	-0.2	0.870551		ATP6V0C	ATP6V0C	ATPase. H+ transporting. lysosomal 16kDa. V0 subunit c	---	0006810 // transport // inferred from electronic annotation /// 0006811 // ion transport // inferred from electronic annotation /// 0015986 // ATP synthesis coupled proton transport // inferred from electronic annotation /// 0015992 // proton transport // traceable author statement /// 0015992 // proton transport // inferred from electronic annotation /// 0044419 // interspecies interaction betwe…	0005515 // protein binding // inferred from physical interaction /// 0015078 // hydrogen ion transmembrane transporter activity // inferred from electronic annotation /// 0046933 // hydrogen ion transporting ATP synthase activity. rotational mechanism // traceable author statement /// 0046961 // proton-transporting ATPase activity. rotational mechanism // traceable author statement	16	16p	2.56704e+06
210550_s_at			0.033	0.955	2.3	2.5	-0.2	0.870551		RASGRF1	RASGRF1	Ras protein-specific guanine nucleotide-releasing factor 1	---	0006915 // apoptosis // not recorded /// 0007165 // signal transduction // traceable author statement /// 0007264 // small GTPase mediated signal transduction // inferred from electronic annotation /// 0007616 // long-term memory // non-traceable author statement /// 0008283 // cell proliferation // inferred from electronic annotation /// 0008624 // induction of apoptosis by extracellular signals…	0005085 // guanyl-nucleotide exchange factor activity // not recorded /// 0005085 // guanyl-nucleotide exchange factor activity // inferred from electronic annotation /// 0005085 // guanyl-nucleotide exchange factor activity // traceable author statement /// 0005088 // Ras guanyl-nucleotide exchange factor activity // traceable author statement /// 0005089 // Rho guanyl-nucleotide exchange factor…	15	15q	7.93186e+07
218895_at			0.033	0.955	5	5.2	-0.2	0.870551		GPATCH3	GPATCH3	G patch domain containing 3	---	---	0003676 // nucleic acid binding // inferred from electronic annotation	1	1p	27221968
1562604_at			0.033	0.955	2.2	2.4	-0.2	0.870551		---	---	---	---	---	---	2	2p	47506583
243272_at			0.033	0.955	3.2	3.4	-0.2	0.870551		---	---	---	---	---	---	12	12q	1.22713e+08
205340_at			0.034	0.955	6.2	6.4	-0.2	0.870551		ZBTB24	ZBTB24	zinc finger and BTB domain containing 24	---	0006350 // transcription // inferred from electronic annotation /// 0045449 // regulation of transcription // inferred from electronic annotation	0003676 // nucleic acid binding // inferred from electronic annotation /// 0003677 // DNA binding // inferred from electronic annotation /// 0005515 // protein binding // inferred from physical interaction /// 0005515 // protein binding // inferred from electronic annotation /// 0008270 // zinc ion binding // inferred from electronic annotation /// 0046872 // metal ion binding // inferred from el…	6	6q	109794079
233158_at			0.034	0.955	3	3.2	-0.2	0.870551		KRT82	KRT82	keratin 82	---	---	0005198 // structural molecule activity // inferred from electronic annotation /// 0005515 // protein binding // inferred from physical interaction /// 0030280 // structural constituent of epidermis // non-traceable author statement	12	12q	5.2794e+07
1555740_a_at			0.034	0.955	1.9	2.1	-0.2	0.870551		MRAP	MRAP	melanocortin 2 receptor accessory protein	---	0030819 // positive regulation of cAMP biosynthetic process // inferred from direct assay /// 0034394 // protein localization at cell surface // inferred from direct assay /// 0050873 // brown fat cell differentiation // inferred from electronic annotation	0031780 // adrenocorticotropin hormone receptor binding // inferred from physical interaction /// 0031781 // type 3 melanocortin receptor binding // inferred from physical interaction /// 0031782 // type 4 melanocortin receptor binding // inferred from physical interaction /// 0031783 // type 5 melanocortin receptor binding // inferred from physical interaction /// 0070996 // type 1 melanocortin …	21	21q	33679187
241234_at			0.034	0.955	3.9	4.1	-0.2	0.870551		LOC100506797	LOC100506797	hypothetical LOC100506797	---	---	---	2	2q	118942192
1558899_s_at			0.034	0.955	2.5	2.6	-0.2	0.870551		FLJ35946	FLJ35946	hypothetical protein FLJ35946	---	---	---	5	5q	9.81071e+07
241678_at			0.034	0.955	1.7	1.9	-0.2	0.870551		---	---	---	---	---	---	13	13q	3.55155e+07
1556582_at			0.034	0.955	5.2	5.4	-0.2	0.870551		PVR	PVR	poliovirus receptor	---	0002860 // positive regulation of natural killer cell mediated cytotoxicity directed against tumor cell target // inferred from mutant phenotype /// 0007155 // cell adhesion // inferred from electronic annotation /// 0016337 // cell-cell adhesion // inferred from electronic annotation /// 0016477 // cell migration // inferred from electronic annotation /// 0042271 // susceptibility to natural kil…	0001618 // viral receptor activity // inferred from electronic annotation /// 0004872 // receptor activity // traceable author statement /// 0004872 // receptor activity // inferred from electronic annotation /// 0005515 // protein binding // inferred from physical interaction /// 0005515 // protein binding // inferred from electronic annotation /// 0050839 // cell adhesion molecule binding // in…	19	19q	45168254
226059_at			0.034	0.955	6	6.2	-0.2	0.870551		TOMM40L	TOMM40L	translocase of outer mitochondrial membrane 40 homolog (yeast)-like	---	0006810 // transport // inferred from electronic annotation /// 0006811 // ion transport // inferred from electronic annotation /// 0006820 // anion transport // inferred from electronic annotation /// 0015031 // protein transport // inferred from electronic annotation /// 0055085 // transmembrane transport // inferred from electronic annotation	0004872 // receptor activity // inferred from electronic annotation /// 0008308 // voltage-gated anion channel activity // inferred from electronic annotation /// 0015288 // porin activity // inferred from electronic annotation	1	1q	1.61198e+08
216887_s_at			0.034	0.955	2.5	2.7	-0.2	0.870551		LDB3	LDB3	LIM domain binding 3	---	---	0005080 // protein kinase C binding // inferred from electronic annotation /// 0005515 // protein binding // inferred from physical interaction /// 0005515 // protein binding // inferred from electronic annotation /// 0008270 // zinc ion binding // inferred from electronic annotation /// 0046872 // metal ion binding // inferred from electronic annotation	10	10q	88461600
1564658_at			0.035	0.955	4.1	4.3	-0.2	0.870551		C7orf52	C7orf52	chromosome 7 open reading frame 52	---	0008152 // metabolic process // inferred from electronic annotation	0008080 // N-acetyltransferase activity // inferred from electronic annotation /// 0008415 // acyltransferase activity // inferred from electronic annotation /// 0016740 // transferase activity // inferred from electronic annotation	7	7q	100820240
1564285_at			0.035	0.955	2.3	2.5	-0.2	0.870551		HFM1	HFM1	HFM1. ATP-dependent DNA helicase homolog (S. cerevisiae)	---	---	0000166 // nucleotide binding // inferred from electronic annotation /// 0003676 // nucleic acid binding // inferred from electronic annotation /// 0004386 // helicase activity // inferred from electronic annotation /// 0005524 // ATP binding // inferred from electronic annotation /// 0008026 // ATP-dependent helicase activity // inferred from electronic annotation /// 0016787 // hydrolase activi…	1	1p	9.18548e+07
231596_at			0.035	0.955	3.5	3.6	-0.2	0.870551		---	---	---	---	---	---	8	8q	9.91945e+07
[truncated: 1,505 more rows]

## Sheet: Supp Table 5
	Fold Change Non-Responders / responders and p-value
	Initial series (t-test)	Independent series (Mann-Whytney-test)
[truncated: 6 more rows]

## Sheet: Supp Table 6
	Nb corresponding cases in population	Nb corresponding cases in list	Hypergeometric test p-value	Hyperg. adj. p (BH)	corresponding elements in list
[truncated: 11 more rows]

[truncated: 1 more sheets: Supp Table 7]
